# Supplementary material for: A novel computational pipeline for var gene expression augments the discovery of changes in the Plasmodium falciparum transcriptome during transition from in vivo to short-term in vitro culture
Source: bioRxiv preprint, doi:10.1101/2023.03.21.533599, version 4 (2023-12-08)
Supplement: Supplementary File 2 [file 533599_file29.xlsx]

## Sheet: Summary
		severe (s) vs non-severe (ns)	naive (n) vs pre-exposed (p)				Position D1	Position D1	Position D2	Position D2	Position D2	Position D2	Position D3	Position D3	Position D3	Position D3	Position D3		Position D4	Position D4	Position D4	Position D4	Position D4	Position D4	Position D4	Position D4	Position D5	Position D5	Position D5	Position D5	Position D5	Position D5	Position D5	Position D5	Position D6	Position D6	Position D6	Position D6	Position D6	Position D6	Position D6	Position D6	Domain 07	Domain 07	Domain 07	Domain 07	Domain 07	Domain 07	Domain 07
Sample no.	Sample description	s vs ns	n vs p	total reads	reads (>10 seqs per cluster)	number of cluster with >10 sequences	NTSA	NTSB	DBLa0	DBLa1	DBLa2	DBLpam1	CIDRa1exclvar1	CIDRa2-6	CIDRb	CIDRg	CIDRd	CIDRa1.2-3	DBLb	DBLg	DBLd	DBLe	DBLz	CIDRb	CIDRg	CIDRd	DBLb	DBLg	DBLd	DBLe	DBLz	CIDRb	CIDRg	CIDRd	DBLb	DBLg	DBLd	DBLe	DBLz	CIDRb	CIDRg	CIDRd	DBLb	DBLg	DBLd	DBLe	DBLz	CIDRb	CIDRg
#6	Ex-vivo P&L	ns	n	2060	1820	25	0.215385	0.450549	0.462088	0.215385	0.0620879	0	0.0912088	0.462088	0	0	0.0104396	0.0291209	0.247802	0	0.305495	0	0	0	0	0	0	0.11044	0.0406593	0	0	0.17033	0	0	0	0	0	0.0291209	0.0192308	0.0406593	0	0	0	0.0291209	0	0.0192308	0	0	0
	1.Gen	ns	n	3323	2947	26	0.0804208	0.591449	0.787241	0.0804208	0.020699	0	0.0342721	0.787241	0	0	0.00610791	0.00916186	0.391585	0	0.386155	0	0	0	0	0	0	0.173057	0.19172	0	0	0.199186	0	0	0	0	0.0084832	0.00916186	0.134713	0.19172	0	0	0	0.00916186	0	0.134713	0	0.0084832	0
	2.Gen	ns	n	1734	1476	23	0.260163	0.515583	0.571816	0.260163	0.0440379	0	0.0657182	0.571816	0	0	0	0.0189702	0.184282	0	0.450542	0	0	0	0	0	0	0.0806233	0.0691057	0	0	0.262195	0	0	0	0	0	0.0189702	0.0176152	0.0691057	0	0	0	0.0189702	0	0.0176152	0	0	0
	3.Gen	ns	n	2995	2576	32	0.151398	0.566382	0.71972	0.151398	0.0190217	0	0.0368789	0.71972	0	0	0.00892857	0.0248447	0.248835	0	0.60986	0	0	0	0	0	0	0.0799689	0.0458075	0	0	0.307453	0	0	0	0	0.00427019	0.0248447	0.0256211	0.0520186	0	0	0	0.0248447	0	0.0256211	0	0.00427019	0
#9	Ex-vivo P&B	ns	n	1547	1347	16	0.0222717	0.74536	0.76095	0.0222717	0	0	0	0.76095	0	0	0	0.0222717	0.0393467	0.240535	0.44395	0	0	0	0	0	0	0.0393467	0.240535	0	0	0.385301	0.0586488	0	0	0	0.0081663	0.0764662	0.0445434	0	0.240535	0	0	0.0222717	0	0.285078	0	0	0
	1.Gen	ns	n	1997	1804	14	0.0947894	0.663525	0.663525	0.0947894	0	0	0	0.663525	0	0	0	0.0947894	0.0947894	0.0338137	0.629712	0	0	0	0	0	0	0.0947894	0.0338137	0	0	0.587029	0.0426829	0	0	0	0	0.144124	0.0260532	0	0.0338137	0	0	0.0947894	0	0.059867	0	0	0
	2.Gen	ns	n	2149	1912	14	0.0460251	0.511506	0.517259	0.0460251	0	0	0	0.517259	0	0	0	0.0460251	0.0460251	0.0460251	0.460251	0	0	0	0	0	0	0.0460251	0.0460251	0	0	0.402197	0.0580544	0	0	0	0	0.137552	0.042364	0	0.0460251	0	0	0.0460251	0	0.0883891	0	0	0
#14	Ex-vivo P&B	ns	n	1976	1740	35	0.0798851	0.574138	0.664943	0.0798851	0.0281609	0	0.0614943	0.664943	0	0	0	0.0114943	0.108621	0.0350575	0.579885	0	0	0	0	0	0	0.108621	0	0	0	0.236207	0.154598	0	0	0.00862069	0.0247126	0.0206897	0.0281609	0	0	0	0	0.0114943	0.00862069	0.0281609	0	0	0
	2.Gen	ns	n	2655	2293	33	0.126908	0.753162	0.758831	0.126908	0.0418666	0	0.132141	0.758831	0	0.00479721	0	0.011775	0.197122	0.0196249	0.682512	0	0	0	0	0	0	0.191888	0	0.00479721	0	0.1099	0.0148277	0	0	0.079372	0.0174444	0.0536415	0.0566943	0	0	0	0	0.011775	0.079372	0.0614915	0	0	0.00654165
#25	Ex-vivo P&B	s	n	2638	2495	28	0.369138	0.540281	0.439279	0.369138	0.176353	0	0.362325	0.324248	0	0.0168337	0.151904	0.0144289	0.785571	0.0557114	0.135471	0	0	0	0	0	0.0144289	0.524248	0.0725451	0	0	0.135471	0	0	0	0.141483	0.202405	0.0388778	0.00681363	0.0653307	0	0	0.0557114	0.0188377	0	0.0312625	0	0.142285	0.00641283
	1.Gen	s	n	2176	2003	27	0.222167	0.662506	0.614079	0.222167	0.144783	0	0.235647	0.476286	0	0.0134798	0.105342	0.0124813	0.756365	0.0214678	0.203195	0	0	0	0	0	0.0214678	0.50025	0.0619071	0	0	0.188218	0	0	0	0.0828757	0.281078	0.0124813	0.01997	0.0524214	0	0	0.0214678	0.0434348	0	0.01997	0	0.203694	0.00698952
#26	Ex-vivo P&B	s	n	1413	1209	26	0.328371	0.53598	0.5244	0.328371	0.101737	0	0.291977	0.5244	0.0909843	0.038048	0	0.00909843	0.404467	0.129032	0.421009	0	0	0	0	0	0	0.354012	0.038048	0.0909843	0	0.142266	0.0330852	0	0	0.139785	0.205128	0.0248139	0.103391	0.0479735	0	0	0.038048	0.019024	0.139785	0.119107	0	0.0645161	0
	1.Gen	s	n	3631	3073	47	0.0817121	0.877756	0.846304	0.0817121	0.0588235	0	0.075227	0.846304	0.0269131	0.0301556	0	0	0.314202	0.0525292	0.522374	0	0	0	0	0	0.0035668	0.314202	0.0301556	0.0223735	0	0.116083	0.219844	0	0	0.0415045	0.22406	0	0.0327497	0.00875486	0	0.0256161	0.00453956	0.0042153	0.0246433	0.0327497	0.0424773	0.156291	0
#29	Ex-vivo P&B	ns	p	4098	2254	23	0.0288376	0.895741	0.895741	0.0288376	0	0	0	0.895741	0	0.0288376	0	0	0.0905058	0.0288376	0.679237	0	0	0	0	0	0	0.0905058	0.0288376	0	0	0.0350488	0.530169	0	0	0	0.0652174	0	0	0	0	0.0288376	0	0	0	0	0.0288376	0.0110914	0
	1.Gen	ns	p	4053	3583	48	0.131454	0.718392	0.746302	0.131454	0.00362824	0	0.0750768	0.746302	0	0.0237231	0.00753558	0.0287469	0.181412	0.034887	0.530282	0	0	0	0	0	0.0304214	0.140385	0.0454926	0	0	0.152665	0.303098	0	0	0.0304214	0.0865197	0.100754	0	0.0106056	0.00362824	0.0237231	0	0.0393525	0	0	0.0237231	0.0209322	0
	2.Gen	ns	p	1994	1647	33	0.15847	0.795993	0.792957	0.15847	0.0261081	0	0.0261081	0.792957	0.102611	0.0455373	0	0.0103218	0.151791	0.139041	0.559199	0	0	0	0	0	0	0.151791	0.0455373	0.0935033	0	0.165149	0.319976	0	0	0	0.0716454	0.0103218	0.100789	0	0	0.0455373	0	0.0103218	0	0.100789	0.0455373	0.044323	0
#4	Ex-vivo P&L	ns	p	3710	1297	9	0.660756	0.175019	0.339244	0.660756	0	0	0	0.339244	0	0	0	0.660756	0.705474	0.181187	0.0346955	0	0	0	0	0	0	0.682344	0	0	0.140324	0.0239013	0	0	0	0	0	0.801079	0	0	0	0	0	0.660756	0	0	0	0	0
	1.Gen	ns	p	2897	2565	33	0.253801	0.575049	0.626901	0.253801	0.0440546	0	0.0530214	0.626901	0	0	0	0.177388	0.28577	0.0709552	0.458869	0	0	0	0	0	0	0.226121	0.0502924	0	0.0424951	0.0838207	0	0	0	0	0	0.219883	0.00467836	0.0502924	0	0	0	0.177388	0	0.00467836	0	0	0
	2.Gen	ns	p	6875	6393	46	0.240888	0.376662	0.748788	0.240888	0.00375411	0	0.0452057	0.748788	0	0	0.00172063	0.197716	0.256531	0.356171	0.359299	0	0	0	0	0	0	0.245112	0.281871	0	0.062412	0.141405	0.00406695	0	0	0.02972	0.00625684	0.306585	0	0.270452	0	0	0	0.468168	0.02972	0	0	0.00250274	0
#12	Ex-vivo	ns	p	1667	1414	15	0.0933522	0.781471	0.792786	0.0933522	0	0	0	0.792786	0	0	0	0.0933522	0.157001	0	0.729137	0	0	0	0	0	0	0.157001	0	0	0	0.303395	0.00777935	0	0	0	0.0636492	0.0933522	0	0	0	0	0	0.0933522	0	0	0	0.0636492	0
	1.Gen	ns	p	1884	1611	18	0.0142768	0.921167	0.921167	0.0142768	0	0	0	0.921167	0	0	0	0.0142768	0.352576	0	0.582868	0	0	0	0	0	0	0.352576	0	0	0	0.358163	0.088144	0	0	0	0.338299	0.0142768	0	0	0	0	0	0.0142768	0	0	0	0.338299	0
	2.Gen	ns	p	1461	1152	12	0.0173611	0.956597	0.956597	0.0173611	0	0	0.0173611	0.956597	0	0	0	0	0.155382	0.375868	0.442708	0	0	0	0	0	0	0.155382	0	0	0.375868	0.424479	0.0182292	0	0	0	0.155382	0	0	0	0	0	0	0	0	0	0	0.138021	0
#5	Ex-vivo P&B	ns	p	2585	2421	19	0.0227179	0.849649	0.927716	0.0227179	0	0	0	0.927716	0	0	0	0.0227179	0.344899	0	0.425444	0.180091	0	0	0	0	0	0.344899	0	0	0.180091	0.35316	0	0	0	0	0	0.275919	0.291202	0	0	0	0	0.0227179	0	0.256919	0.0731103	0	0
	1.Gen	ns	p	1627	1483	17	0.0701281	0.730951	0.899528	0.0701281	0	0	0	0.899528	0	0	0	0.0701281	0.443695	0	0.507755	0.0182063	0	0	0	0	0	0.443695	0	0	0.0182063	0.450438	0	0	0	0	0	0.242751	0.342549	0	0	0	0	0.0701281	0	0.308159	0.154417	0	0
#7	Ex-vivo P&B	ns	p	3639	3368	17	0.0317696	0.640439	0.759798	0.0317696	0	0	0	0.759798	0	0	0	0.0317696	0.0317696	0	0.61728	0.0688836	0	0	0	0	0	0.0317696	0	0.0688836	0	0.31829	0.29899	0	0	0	0	0.121734	0	0	0	0	0	0.0528504	0	0	0	0	0
	1.Gen	ns	p	2766	2588	17	0.011592	0.593895	0.713679	0.011592	0	0	0	0.713679	0	0	0	0.011592	0.011592	0	0.713679	0	0	0	0	0	0	0.011592	0	0	0	0.448609	0.186244	0	0	0	0	0.112056	0	0	0	0	0	0.112056	0	0	0	0	0
	2.Gen	ns	p	1929	1689	23	0.0307874	0.551214	0.682652	0.0307874	0.0153937	0	0.0284192	0.682652	0	0	0	0.017762	0.0331557	0	0.682652	0	0	0	0	0	0	0.0331557	0	0	0	0.327413	0.16045	0	0	0	0.0153937	0.0917703	0	0	0	0	0	0.0408526	0	0	0	0.0153937	0
#17	Ex-vivo	ns	p	2428	2312	11	0.00648789	0.92301	0.92301	0.00648789	0	0.0705017	0	0.92301	0.00648789	0	0	0	0.0705017	0.00648789	0.92301	0	0	0	0	0	0	0	0	0.0769896	0	0.798443	0.124567	0	0	0	0	0.466696	0.00648789	0	0	0	0	0	0	0.00648789	0.466696	0	0
	1.Gen	ns	p	2145	1987	11	0.0941117	0.905888	0.905888	0.0941117	0	0	0.0941117	0.905888	0	0	0	0	0.0941117	0.00553598	0.900352	0	0	0	0	0	0.0941117	0	0	0	0.00553598	0.258178	0.642174	0	0	0.0941117	0	0.00553598	0	0	0	0	0	0	0	0	0	0	0
	2.Gen	ns	p	2081	1925	14	0.0119481	0.936623	0.936623	0.0119481	0	0.0514286	0	0.936623	0.0119481	0	0	0	0.0820779	0.0909091	0.827013	0	0	0	0	0	0	0.0306494	0	0.0633766	0.078961	0.622338	0.196883	0	0	0	0	0.512208	0.0119481	0	0	0	0	0	0	0.0119481	0.433247	0	0
[truncated: 179 more columns]

## Sheet: #6_ex vivo
	Total reads	Singletons
	2060	106
						Position D1	Position D1	Position D2	Position D2	Position D2	Position D2	Position D3	Position D3	Position D3	Position D3	Position D3	Position D4	Position D4	Position D4	Position D4	Position D4	Position D4	Position D4	Position D4	Position D5	Position D5	Position D5	Position D5	Position D5	Position D5	Position D5	Position D5	Position D6	Position D6	Position D6	Position D6	Position D6	Position D6	Position D6	Position D6	Domain 07	Domain 07	Domain 07	Domain 07	Domain 07	Domain 07	Domain 07	Domain 07	Domain 08
Sample_ID_cluster_no	Cluster_size	Blast_cluster_sequence	Best Blast hit	E-value	# hits in varDB	NTSA	NTSB	DBLa0	DBLa1	DBLa2	DBLpam1	CIDRa1	CIDRa2-6	CIDRb	CIDRg	CIDRd	DBLb	DBLg	DBLd	DBLe	DBLz	CIDRb	CIDRg	CIDRd	DBLb	DBLg	DBLd	DBLe	DBLz	CIDRb	CIDRg	CIDRd	DBLb	DBLg	DBLd	DBLe	DBLz	CIDRb	CIDRg	CIDRd	DBLb	DBLg	DBLd	DBLe	DBLz	CIDRb	CIDRg	CIDRd	DBLb
#6_exvivo_cluster_149	267	GCGATATTATCAGAGGAAGAGATATGTTTAAATCTAATGGAAAAGTAGAAAAAGCTCTAAGAGAAGTTTTCAAGAAAATACATAGTGGTTTGAATAAAAGCAAAATTAATGATTATGATCATGATGGTACTGGAAACTACGTAAAATTAAGGGAAGATTGGTGGACGGCTAACCGCGATCAAGTATGGAAAGCATTAACATGTTCTGCACCGTATGATGCTAACTATTATCGAAAATATTCAGATAAAAGTATGGATTTTACAAGTCAAGGACAATGTGGCCACACGGAAGGAACTGTTCCTACAAATCTTGATTATGTCCCTCAATTTTTAAGA	DBLa1.7	0	62	39	0	0	40	0	0	18	0	2	1	20	28	13	0	0	0	0	0	0	14	20	5	1	0	0	0	0	0	13	13	3	0	3	1	0	3	1	3	0	1	10	1	1	1
#6_exvivo_cluster_67	228	GAGACATTATAAGAGGAAAAGATCTGTATCTCGGTAATCCGCAAGAAAGTGCACAAAGAGATAAATTAGAAAAGAATTTGAAAGAAATTTTCGAGAAAATACATAGTGGATTGGATGATAAAATAAAATCAAAGTATAATGGTGATACTGAAAATTATTATCAATTAAGGGAAGATTGGTGGTATGCTAATCGAGAAACAGTATGGAAAGCCATCACGTATGAAGTTAAGAGTGGTTCTGACTATTTTCGACCAACATGTGGTGGTGATAGTGAAAGTCCATCTCAAGCTCATGACAAATGCCGATGTCACAATGGTAAAAATGCCGACCAGGTTCCCACCTATTTCGATTATGTGCCACAATATTTGAGA	DBLa0.14	2.57272e-78	1	0	0	0	0	0	0	0	0	0	0	0	0	0	0	0	0	0	0	0	0	0	0	0	0	0	0	0	0	0	0	0	0	0	0	0	0	0	0	0	0	0	0	0	0
#6_exvivo_cluster_90	136	AGACATTGTACGAGGAAAAGATCTTTTCCTCGGTAATGATaaagaaaaagaaaaaagaaaacaattagaaaaggaattgaaagATATTTTCAAGAATATATATGACAAATTGAAGAATGGGAAGACGAATGGCGCAGAAGCACGCTACAAAGATACTGATAATTATTATGAATTAAGAGAAGATTGGTGGACAGAGAATCGAGAAACAGTATGGAAAGCATTAACATGCAAGGCTGACGATAGTAATAGATATTTTCGACCAACATGTGCTGGAGGAACAACTTCAACTCAAGGTAAATGCCGATGTCCCAATGGTAACAACCAGGTCCCCACATATTTTGACTATGTGCCACAGTATCTTCGC	DBLa0.18	0	3	0	2	2	0	0	0	0	2	0	0	0	2	0	0	0	0	0	0	0	0	1	0	0	1	0	0	0	0	0	0	1	1	0	0	0	0	0	0	1	0	0	0	0	0
#6_exvivo_cluster_142	113	TGATATTATTCGTGGAAAAGATCTTTATCGTGGAAATAAACAAGAAAAAGATGCATTACAAGAGCAATTAAAGAAATATTTCAAGCAATTACATATTAATTTGCAACATCCAGCAAAAAGCCATTATAATGACCCAAGCGGAAATTTTTATCAACTAAGGGAAGATTGGTGGAATGCCAATAGGCAAGAAATATGGAAAGCTATTACATGCAAGGCAACTGATACTCAATATTTTAGAAATACATGTTCTGGTGGTGAAAGTCCGACAACTGTAGAATGTCACTGCATTGATGGAACTGTCCCTACAAATTTAGATTATGTCCCTCAATTTTTACGTT	DBLa0.18	0	18	0	9	12	0	0	0	0	12	0	0	0	3	0	9	0	0	0	0	0	0	0	2	0	0	6	2	0	0	0	0	0	0	2	0	0	0	0	0	0	0	0	0	0	0
#6_exvivo_cluster_143	101	GTGATATTATTCGCGGCAAAGATCTTTATATTCGTAATAAACAAGAAAAAGATAGATTAGAAGAGAATTTACAAAAAATTTTCGGGCATATATATGAAGAATTGACGAACGGCGCACAAACTTACTACAATGATGATAAAGAAAATTATTATAAATTAAGGGAAGATTGGTGGAACGCTAATAGACAACAAGTATGGAATGCTATAATATGTGGTGTAGAAAAAAACGAGAAATATTTTAAAAACACATGTTCATCTAAAGGTGGGCATTATGAAAAATGCCGATGTATTAATGGCGACGTTCTTACGAATTTCGATTATGTTCCGCAGTATCTTCGC	DBLa2	0	5	0	3	0	0	4	0	4	0	0	0	0	4	0	0	0	0	0	0	0	0	3	0	0	0	0	0	0	0	0	0	1	1	0	0	0	0	0	0	2	0	0	0	0	0
#6_exvivo_cluster_40	96	AGATATTATAAGAGGAAAAGATCTATTTCGTGGTTATGATGATgaagaaaaaaaccgaagagaaaaattagaaaataagttgaaagaaaTTTTCAAGAATATATATATAAGGACGTGATGAAGACGAGCGGGAGTAATGGGCAGAAGTCGGCGGAAGCAAAAGATCGCTACAAAGATACTAAAAATTATTATCAATTACGAGAAGATTGGTGGGACGCAAATCGCGCCAAAGTATGGTATGCTATGACGTGTGGTGCAGGACAAAATGATAAATATTTTCGACAATCATGTTCTGGTGGAAAAACTTGGACTAATGAAAAATGCCGATGCGTAAACCGTGCAGATGTTCCCACATATTTCGATTATGTGCCGCAGTTTCTTCGC	DBLa0.9	0	3	0	3	3	0	0	0	0	3	0	0	0	0	0	3	0	0	0	0	0	0	0	0	0	0	2	1	0	0	0	0	0	0	0	0	0	0	0	0	0	0	0	0	0	0
#6_exvivo_cluster_137	78	GCGATATTGTAAGAGGAAAAGATCTATATAGTGGTAATAACaaagaaaaagttaaattagaaaagaaattaaaaaGAATTTTCGGGATAATATATGGAAAATTGAATGGTGTAAAAGACCACTACAAAGATGCAACTGGAGATTTTTTTAAATTAAGAGAAGATTGGTGGACTGCTAATAGAAACGATGTATGGAAAGCATTAACATGTAACGCTCAAGGTAATACATATTTTCGACAAACAGCGTGTGCAGGAACGCGGACTAATGACAAATGCCGATGTGACGACAAGGCAAATGTCGATCCCCCAACCTATTTCGATTATGTGCCGCAGTATCTTCGC	DBLa0.8	2.85985e-122	1	0	0	0	0	0	0	0	0	0	0	0	0	0	0	0	0	0	0	0	0	0	0	0	0	0	0	0	0	0	0	0	0	0	0	0	0	0	0	0	0	0	0	0	0
#6_exvivo_cluster_66	74	GTGATATCGTACGCGGCAAAGATCTTTTCCTTGGTAATACATATGAAAGTGCACAAAGAGATCAATTAGAGAAGAATTTGAAAGATATTTTCACGCAAATATATAATGACGTGACAAATGATCAGACGAAGAAGGCGGAAGCAGAAAAACGCTACAATGATACTACAAATTATTTTCAATTAAGAGAAGACTGGTGGGCACTTAATAGAGAAACGGTATGGAAAGCCATAACATGTAGCGAGGACCTAAAAAATTCTTCATATTTTCGAGCAACATGTGGTAGTAGTGGAGAAACTCCGACTGATGATAAATGCCGATGTAGCGACAACCAAGTCCCAACATATTTTGAATACGTGCCACAGTATCTTCGC	DBLa0.5	0	1	0	0	1	0	0	0	0	1	0	0	0	1	0	0	0	0	0	0	0	0	0	1	0	0	0	0	0	0	0	0	0	0	1	0	0	0	0	0	0	0	0	0	0	0
#6_exvivo_cluster_20	73	TGATATCGTACGCGGCAAAGATCTTTTCCTTGGTAATACATATGAAAGTGCACAAAGAGATCAATTAGAGAAGAATTTGAAAGATATTTTCGCGAAAATACATAGTGAAGTGAGGAGAGGGAGTAATTGGCAGGCTCTAAAAACACGCTACGAAAATGATAATGAAAATTATTATCAATTACGAGAAGATTGGTGGACTGCGAATCGCGCCACAATCTGGGAAGCTATCACGTGCAACGACGACAAGAAGCTATCAAGTGCTTCATATTTTCGAGAAACGTGCAGTGATCGTAATGGAAATAGTCAGTATCAAACTCAAAACCAATGCCGATGTCCCAATGGTAACAACCAGGTCCCCACATATTTTGACTATGTGCCACAGTATCTTCGC	DBLa0.14	2.57272e-78	1	0	0	0	0	0	0	0	0	0	0	0	0	0	0	0	0	0	0	0	0	0	0	0	0	0	0	0	0	0	0	0	0	0	0	0	0	0	0	0	0	0	0	0	0
#6_exvivo_cluster_28	72	AGATATTGTCAGAGGAAAAGATCTATTTTATGGAAATACACaagaaaaagatcaaagaaaaaaattacaacaaaatttgaaaaaaattttcgagaaaaTACATGGTAACGTGACGAGCGACAAGAATGGGCAGGCTCTAAAAACACGCTACGAAGGTGATaaaaaaaaTTATTTTTATCAATTAAGGGAAGATTGGTGGGACGCGAATCGGCACACCGTGTGGGAAGCCATGACATGCAGCGACAAGCTAAAAAATTCTGCATATTTTCGACCAACGTGCGATAGTAGTGATGaaaaaaaaTTCAACTCTTGCTAGTAACAAATGCCGATGTCCCAATGGTAACAACCAGGTCCCCACATATTTTGACTATGTGCCACAGTATCTTCGC	DBLa0.5	0	32	0	27	31	0	0	0	0	31	0	0	0	0	0	29	0	0	0	0	0	0	0	0	0	0	21	6	0	0	0	0	1	1	0	0	0	0	0	0	2	0	0	0	0	0
#6_exvivo_cluster_56	65	GTGATATCATACGAGGAAGAGATCTTTTCCTCGGTAATGATAAAGAAAAAGATCAAAGAAAACAATTAGATGATAATTTGAAAGATATTTTCGCGAAAATATATGACAATTTGGGTAAGAATAAGGAGGATGCAAAAGGACACTACGGAGGTGATAAAGATTTCTTTCAATTACGAGAAGACTGGTGGGATGCTAATAGAAAAGAGGTATGGAAAGCATTAACATGCGGTGCGCCAGAAGGTGCTTCATATTTTCGTGCAACATGTAGTGGAGGAAATCTAACATATAACAAATGCCGTTGTCAGAAGAAAGACGGCAAAAGTGAGACCGACCAGGTCCCCACCTATTTTGACTATGTGCCGCAGTATCTTCGC	DBLa0.14	2.57272e-78	1	0	0	0	0	0	0	0	0	0	0	0	0	0	0	0	0	0	0	0	0	0	0	0	0	0	0	0	0	0	0	0	0	0	0	0	0	0	0	0	0	0	0	0	0
#6_exvivo_cluster_53	60	AGATATTGTAAGAGGAAAAGATCTGTATCTCGGTTATGATGAtaaagaaaaaaaccgaagacaaaaaaatagaagagaatttgaaagaaattttcgggaaaaTACATAGTGAAGTGACGAGCGACAAGAATGTGGAGCTACAAAAACGCTACAAAGATATTAATGATCCAAATTTTTATAAATTACGAGAAGATTGGTGGACAGCGAATAGGCACACCGTGTGGGAAGCTATCACGTGCAAGGCGGAGCAGAATAATAAATATTTTAGAAAAACAGCGTGTGCAGGAAAAACTCCGAATCAAGGTCGATGCCGATGTGACGACATTCCAAATACCGATCCCCCAACCTATTTTGATTATGTGCCACAGTTTCTTCGC	DBLa0.16	0	2	0	0	1	0	0	0	0	1	0	0	0	0	0	1	0	0	0	0	0	0	0	0	0	0	1	0	0	0	0	0	0	0	0	0	0	0	0	0	0	0	0	0	0	0
#6_exvivo_cluster_168	59	AGACATTATACGAGGAAAAGATCTGTATCGTCGTGATAATAAAAAAGATAAATTAGAAGAGAATTTACAAAAAATTTTCAAGAAAATACATGACAAATTGGATAATAGCATAAAATCAAACTATAATGATGCTCCATATTATTATAAATTACGAGAAGATTGGTGGTATGCTAATAGAATAATGGTATGGAACGCGATAACATGCGGCGTTAAGGGTAATAAATATTTTCGACCAACATGTGTTTCAGGAGAATCGACTAAAGAGAATTGCCAATGTACTAGTTATAAGGTCCCCACATATTTCGATTATGTGCCGCAGTATCTTCGC	DBLa0.9	1.178e-180	17	0	13	16	0	0	0	0	16	0	0	0	0	0	15	1	0	0	0	0	0	0	0	0	1	13	2	0	0	0	0	2	2	0	0	0	0	0	0	2	0	0	0	0	0
#6_exvivo_cluster_19	57	GTGATATCGTACGCGGCAAAGATCTTTTCCTTGGTAATACATATGAAAGTGCACAAAGAGATAAATTAGAACAGAAATTGAAAGATATTTTCAAGGAAATACATGAGGACGTGATGAAGAACAACGGGGCGTTACAAGCTCGATACACAGATAATAAAAATTATTATCAATTACGAGAAGATTGGTGGAATGCAAATCGCTCCACAGTATGGAAAGCATTAACATGTGACCACAGGCTAGCAAGTGCTTCATATTTTCGACCAACGTGCAGTATGAATGGAAGTTGTTCTCAAGCTAATAAATACTGCCGGTGTAACGGCGACCAGCCAGGTAACGACAAGGAAAATACCGATCCCCCAACCTATTTTGACTATGTACCGCAGTTTCTTCGC	DBLa0.1	3.19754e-137	4	0	3	3	0	0	0	0	3	0	0	0	0	0	2	0	0	0	0	0	0	0	0	0	0	1	0	0	0	0	0	0	0	0	0	0	0	0	0	0	0	0	0	0	0
#6_exvivo_cluster_150	53	AGATATTGTAAGAGGAAGAGATATGTTTAAATCTAATGAAATGGTAGAAATCGGTCTAAAAAAGGTTTTCAAGAAAATACATGGTAAATTAAATGGAGCTGCAATATCATATTACGATGCTGATGAAAAAGGAAATTTTTATAAATTAAGAGAAGCATGGTGGAATGTGAATAGAAATAAAGTATGGGAAGCCATAACATGTAAAGCTCCACAAAAAGCTAATTATTTTAGAAAAGGTTCAGATGGTAGTGATGTTTTTACAAGTCAAGGATATTGTGGTCGTAAGGAACTAACCGTTCCTACCTATTTAGATTACGTCCCTCAATTTTTACGT	DBLa1.2	0	93	63	0	0	66	0	0	70	0	0	0	0	2	28	0	0	11	0	0	0	1	37	1	0	0	0	0	0	0	33	1	0	0	1	0	0	1	12	17	0	0	1	0	0	0
#6_exvivo_cluster_138	53	TGATATTGTAAGAGGAATAGATATGTTTAAACCAAATGTCCATGACAAAGTAGAAAAGGGTCTCCGAGAGGTTTTCAAGAAAATACATGATGAAATGGAAGGTGAGGTAAAAAAATTATTACAATCCTGATGGATCTGGAAATTATTATAAATTAAGAGAAGCATGGTGGGATGTGAATAGAAATAAAGTATGGGAAGCCATAACCTGTGGCGCACTACCTAAATCTGCATATTTCTTGCAATCAGAAGATAATAAACAATTATTTTTATATCCTAAATGCGGCCATAATAATAAGAATGATCTTCCTACCAATTTAGATTATGTTCCTCAATATTTACGT	DBLa1.1	0	200	149	0	0	157	0	0	155	2	0	0	0	155	0	0	0	0	0	0	0	0	145	0	0	0	0	0	0	0	0	0	129	0	0	0	0	0	112	0	0	0	0	0	0	0
#6_exvivo_cluster_130	40	GTGATATTATAAGAGGAAAGGATCTTTATCTTGGAAATAGCaaagaaaaagaaaaattagaaaaaaatttaagacaaattttcaaaaaaaTATATGACAAATTGACACATGATGCACAAACTCACTACAAAAAAGATGATAAAGGAAGTGGAAATTATTTTCAATTAAGAGAAGATTGGTGGAATGCCAATAGACAACAAGTTTGGAAAGCCATTACATGCAAAGCGGAAAATGCTCAATATTTTAGAAATACCTGTTCTATGGAAAAAAATTCTACGCAAACAAACTGTCAATGTATTGATGGAGAAGTTCCTACATATTTCGATTATGTGCCTCAATATTTACGT	DBLa0.18	0	3	0	2	2	0	0	0	0	2	0	0	0	2	0	0	0	0	0	0	0	0	1	0	0	1	0	0	0	0	0	0	1	1	0	0	0	0	0	0	1	0	0	0	0	0
#6_exvivo_cluster_68	37	AGATATTGTAAGAGGAAGAGATTTGTATGGTGGTAATAAACaagaaaaagaaaaaagagatgaattagagaagaatttacaaaaaaTTTTTAGGAATATATATGACAAATTATTAGAGTATAACAAGACGAATGGGGAGATAGAAGCTCGCTACGGAAGTGATAAAGATCCAAATTTCTTTCAATTACGAGAAGATTGGTGGGACGCTAATAGAGAAAAAGTATGGAAAGCTATCACATGTAAAGCAAATGATGATGATAAATATTTTAGAAAAACAGCGTGTGCAGGAAAAACTCCGACTGATGATAAATGCCGGTGTAACGACGACCAGGTCCCCACCTATTTTGACTACGTCCCTCAGTATCTTCGC	DBLa0.11	0	3	0	3	3	0	0	0	0	3	0	0	0	0	0	3	0	0	0	0	0	0	0	0	0	0	2	1	0	0	0	0	0	0	0	0	0	0	0	0	0	0	0	0	0	0
#6_exvivo_cluster_101	35	GTGATATCGTACGCGGCAAAGATCTTTTTATAGGTTATAATgaaaaagatcaagaagaaaaaagaaaattacaagagaacttgagaaaaaTTTTCAAGGAAATATATAATAAATTGGGGGATACTGGAGCACAAGAACGCTACGAAGGTGATGAAGCCAATGATTTTTTTAAATTACGAGAAGATTGGTGGGATGCTAATAGACTAGAAGTATGGAAAGCTATCACTTGTGGTGCAGGAGAAAGTGATAAATATTTTAGAAAAACATGTTCTTCCGGAAATTCTAAGACGAGTGGACATTGTAAGTGTATTGATGGAACAGTTCCTACCAACTTGGATTATGTTCCTCAATATTTGAGA	DBLa0.12	0	4	0	3	3	0	0	0	0	3	0	0	0	3	0	0	0	0	0	0	0	0	3	0	0	0	0	0	0	0	0	0	0	3	0	0	0	0	0	0	2	0	0	0	0	0
#6_exvivo_cluster_105	30	AGATATCGTACGCGGTAAAGATCTTTTCCTCGGTAATGATaaagaaaaagaaaaaagaaaacaattagaaaaggaattgaaagATATTTTCAAGAATATATATGACAAATTGAAGAATGGGAAGACGAATGGCGCAGAAGCACGCTACAAAGATACTGATAATTATTATGAATTAAGAGAAGATTGGTGGACAGAGAATCGAGAAACAGTATGGAAAGCATTAACATGCAAGGCTGACGATAGTAATAGATATTTTCGACCAACATGTGCTGGAGGAACAACTTCAACTCAAGGTAAATGCCGATGTAACGACAACCAGGTCACCACATATTTTGACTATGTGCCGCAGTATCTTCGC	DBLa0.14	2.57272e-78	1	0	0	0	0	0	0	0	0	0	0	0	0	0	0	0	0	0	0	0	0	0	0	0	0	0	0	0	0	0	0	0	0	0	0	0	0	0	0	0	0	0	0	0	0
#6_exvivo_cluster_8	27	AGATATTGTGAGAGGAAGAGATCTTTTTATAGGTTATAATCaaaaagatagagaacaaaaacaaaaaatacaagataatttgaaagatattttcaagaaaaTACATAAGGAAGTGACGAACAGGAAGACGAATGAAGAGGCAGCAAAAGCTCGCTACGGAAATGATCCTAAAGAAAATTATTATCAATTACGAGAAGATTGGTGGGATGCGAATCGGGGCACAATCTGGAAAGCCATCACATGTGACGTTAAGGGTAATAGATATTTTCGAGCAACGTGCAATAGTGGTGATAGTCAAGGTCCATCTCAAGCTCAAAACCAATGCCGATGTCCCATGACAAGTGATGGCAAGCCCAACGACCAAGTCCCCACATATTTTGACTATGTTCCACAATATTT…	DBLa0.1	3.19754e-137	4	0	3	3	0	0	0	0	3	0	0	0	0	0	2	0	0	0	0	0	0	0	0	0	0	1	0	0	0	0	0	0	0	0	0	0	0	0	0	0	0	0	0	0	0
#6_exvivo_cluster_131	23	CGATATTGTAAGAGGAAAAGATCTTTTTCTTGGTCATAGCAAAGAAAAAGAAAAATTAGAACAAAATTTGAAAAATCTTTTCAAGCAATTATATGAAGAATTAAAGAAGCATGATACCACGATaaaaaaaaCTTACGAAAAATACGGTCCAGATTTTTATCAATTACGAGAAGATTGGTGGAATAATAATAGAATAATGGTATGGTATGCTATAACGTGTGGTGCAACAGATGGTGATAAATATTTTAGAGAATCATCTTCTGATAAAGGTGGCACTTATGAAAAATGCCGATGTTCTAGTCATAAGGTCCCCACATATTTTGACTATGTGCCGCAGTTTCTTCGC	DBLa0.4	0	5	0	4	4	0	0	0	0	4	0	0	0	0	0	4	0	0	0	0	0	0	0	0	0	0	4	0	0	0	0	0	0	0	0	0	0	0	0	0	0	0	0	0	0	0
#6_exvivo_cluster_161	19	TGATATTATAAGAGGTAGAGATATGTTTCTTGGTAATAATGaaaaagatatgagagaaaaacagaaactgcaaaataatttaaaaaacatttttgggaaaaTTATGGAAAGTGATACAAATCTGAACACACAATCACTGGAAAAAGTTAGGGAATACTGGTGGGCGCTTAATAGAGAAGACGTATGGAAAGCATTAACATGTTCTGCGGATGGCAGTGAAGAATATTTCAAAAAACCAAGCAGCGATGAATACTCATTCTCAAATGGTCAATGCGGTCATAGGGATGAAAACGTCCCAACATATTTAGATTACGTCCCTCAATATTTACGT	DBLa1.5	0	29	23	0	0	23	0	0	0	0	3	0	19	6	14	2	0	0	0	0	0	3	8	8	0	0	2	0	0	2	0	8	0	0	7	1	0	6	2	0	0	0	7	1	0	0
#6_exvivo_cluster_102	12	AGATATCGTACGCGGTAAAGATCTTTTCCTCGGTAATGATGAAGaaaaaagaaaaaaGAGATGAATTAGATGAGAATTTAAAAACAATTTTCAAGAAAATATATGAAGGATTGTCGACGACGAACGGCGCACAAGCTCGCTACGGAGGTGATGAAGCCAATAATTTTTTTCAATTACGAGAAGATTGGTGGTATGCGAATCGGCATACCGTGTGGAAAGCCATCACGTGCGGCACACATGAGGGTGATACATATTTTATGGAATCAAGAACAAATTCCTACAAATTTTCAGGTGATAAATGTGGTCATAATGATGATAACGTTCCAACGAACTTGGACTACGTCCCTCAATTTTTACGT	DBLa2	0	6	0	3	0	0	3	0	3	0	0	0	0	3	0	0	0	0	0	0	0	0	3	0	0	0	0	0	0	0	2	1	0	0	0	0	0	0	0	0	0	2	1	0	0	0
#6_exvivo_cluster_123	12	AGATATTATAAGAGGAAAAGATCTTTATCTTGGTACCAATGaagagaaaaaaccattagaagaaaatttgaaaaaacttttcaaaaaCTTATATAAAGAATTGTCGAGGACGAATGGGGCGAAGGAGCTACAAGCTCGCTACGAAGGTGATGATAATTATTATCAATTACGAGAAGATTGGTGGGCACTGAATAGAAGATATGTATGGGATGCATTAACATGCGAAGCGCCAAATAATGCTAAATATTTTCGACAAACATGTTGTACAGGAACGGGAACACAAGGTCGATGCCGATGTGTGATTGGAGATGTCCCCACATATTTCGATTATGTGCCGAAGTATCTTCGC	DBLa0.6	0	32	0	24	22	0	0	0	0	23	0	0	0	0	0	20	0	4	0	0	0	0	0	0	0	0	17	1	0	0	0	0	0	0	0	0	0	0	0	0	0	0	0	0	0	0
					# hits in varDB	NTSA	NTSB	DBLa0	DBLa1	DBLa2	DBLpam1	CIDRa1	CIDRa2-6	CIDRb	CIDRg	CIDRd	DBLb	DBLg	DBLd	DBLe	DBLz	CIDRb	CIDRg	CIDRd	DBLb	DBLg	DBLd	DBLe	DBLz	CIDRb	CIDRg	CIDRd	DBLb	DBLg	DBLd	DBLe	DBLz	CIDRb	CIDRg	CIDRd	DBLb	DBLg	DBLd	DBLe	DBLz	CIDRb	CIDRg	CIDRd	DBLb
				Sample_total:	531	274	102	106	286	7	0	250	109	5	1	39	209	55	90	1	15	0	0	0	18	221	17	1	3	70	13	0	2	48	23	138	9	14	2	0	10	127	20	10	3	19	2	1	1
Interpreded Results				Position D1	Position D1	Position D2	Position D2	Position D2	Position D2	Position D3	Position D3	Position D3	Position D3	Position D3	Position D3	Position D4	Position D4	Position D4	Position D4	Position D4	Position D4	Position D4	Position D4	Position D5	Position D5	Position D5	Position D5	Position D5	Position D5	Position D5	Position D5	Position D6	Position D6	Position D6	Position D6	Position D6	Position D6	Position D6	Position D6	Domain 07	Domain 07	Domain 07	Domain 07	Domain 07	Domain 07	Domain 07	Domain 07	Domain 08	Domain 08
Sample_ID	Cluster_size			NTSA	NTSB	DBLa0	DBLa1	DBLa2	DBLpam1	CIDRa1	CIDRa2-6	CIDRb	CIDRg	CIDRd	CIDRa1.2-3	DBLb	DBLg	DBLd	DBLe	DBLz	CIDRb	CIDRg	CIDRd	DBLb	DBLg	DBLd	DBLe	DBLz	CIDRb	CIDRg	CIDRd	DBLb	DBLg	DBLd	DBLe	DBLz	CIDRb	CIDRg	CIDRd	DBLb	DBLg	DBLd	DBLe	DBLz	CIDRb	CIDRg	CIDRd	DBLb	DBLg
#6_exvivo_cluster_149	267			1	0	0	1	0	0	0		0	0	0		0	0	0	0	0	0	0	0	0	0	0	0	0	0	0	0	0	0	0	0	0	0	0	0	0	0	0	0	0	0	0	0	0	0
#6_exvivo_cluster_67	228
#6_exvivo_cluster_90	136			0	1	1	0	0	0	0	1	0	0	0		1	0	0	0	0	0	0	0	0	0	0	0	0	0	0	0	0	0	0	0	0	0	0	0	0	0	0	0	0	0	0	0	0	0
#6_exvivo_cluster_142	113			0	1	1	0	0	0	0	1	0	0	0		0	0	1	0	0	0	0	0	0	0	0	0	0	0	0	0	0	0	0	0	0	0	0	0	0	0	0	0	0	0	0	0	0	0
#6_exvivo_cluster_143	101			0	1	0	0	1	0	1		0	0	0		1	0	0	0	0	0	0	0	0	1	0	0	0	0	0	0	0	0	0	0	0	0	0	0	0	0	0	0	0	0	0	0	0	0
#6_exvivo_cluster_40	96			0	1	1	0	0	0	0	1	0	0	0		0	0	1	0	0	0	0	0	0	0	0	0	0	0	0	0	0	0	0	0	0	0	0	0	0	0	0	0	0	0	0	0	0	0
#6_exvivo_cluster_137	78
#6_exvivo_cluster_66	74			0	0	1	0	0	0	0	1	0	0	0		1	0	0	0	0	0	0	0	0	0	1	0	0	0	0	0	0	0	0	0	0	1	0	0	0	0	0	0	0	0	0	0
#6_exvivo_cluster_20	73
#6_exvivo_cluster_28	72			0	1	1	0	0	0	0	1	0	0	0		0	0	1	0	0	0	0	0	0	0	0	0	0	1	0	0	0	0	0	0	0	0	0	0	0	0	0	0	0	0	0	0	0	0
#6_exvivo_cluster_56	65
#6_exvivo_cluster_53	60			0	0	1	0	0	0	0	1	0	0	0		0	0	1	0	0	0	0	0	0	0	0	0	0	1	0	0	0	0	0	0	0	0	0	0
#6_exvivo_cluster_168	59			0	1	1	0	0	0	0	1	0	0	0		0	0	1	0	0	0	0	0	0	0	0	0	0	1	0	0	0	0	0	0	0	0	0	0	0	0	0	0	0	0	0	0	0	0
#6_exvivo_cluster_19	57			0	1	1	0	0	0	0	1	0	0	0		0	0	1	0	0	0	0	0	0	0	0	0	0	1	0	0	0	0	0	0	0	0	0	0	0	0	0	0	0	0	0	0	0	0
#6_exvivo_cluster_150	53			1	0	0	1	0	0	1		0	0	0		0	0	0	0	0	0	0	0	0	0	0	0	0	0	0	0	0	0	0	0	0	0	0	0	0	0	0	0	0	0	0	0	0	0
#6_exvivo_cluster_138	53			1	0	0	1	0	0	0		0	0	0	1	1	0	0	0	0	0	0	0	0	1	0	0	0	0	0	0	0	0	0	1	0	0	0	0	0	1	0	0	0	0	0	0	0	0
#6_exvivo_cluster_130	40			0	1	1	0	0	0	0	1	0	0	0		1	0	0	0	0	0	0	0	0	0	0	0	0	0	0	0	0	0	0	0	0	0	0	0	0	0	0	0	0	0	0	0	0	0
#6_exvivo_cluster_68	37			0	1	1	0	0	0	0	1	0	0	0		0	0	1	0	0	0	0	0	0	0	0	0	0	0	0	0	0	0	0	0	0	0	0	0	0	0	0	0	0	0	0	0	0	0
#6_exvivo_cluster_101	35			0	1	1	0	0	0	0	1	0	0	0		1	0	0	0	0	0	0	0	0	1	0	0	0	0	0	0	0	0	0	0	1	0	0	0	0	0	0	1	0	0	0	0	0	0
#6_exvivo_cluster_105	30
#6_exvivo_cluster_8	27			0	1	1	0	0	0	0	1	0	0	0		0	0	1	0	0	0	0	0	0	0	0	0	0	1	0	0	0	0	0	0	0	0	0	0	0	0	0	0	0	0	0	0	0	0
#6_exvivo_cluster_131	23			0	1	1	0	0	0	0	1	0	0	0		0	0	1	0	0	0	0	0	0	0	0	0	0	1	0	0	0	0	0	0	0	0	0	0	0	0	0	0	0	0	0	0	0	0
#6_exvivo_cluster_161	19			1	0	0	1	0	0	0		0	0	1		0	0	0	0	0	0	0	0	0	0	0	0	0	0	0	0	0	0	0	0	0	0	0	0	0	0	0	0	0	0	0	0	0	0
#6_exvivo_cluster_102	12			0	1	0	0	1	0	1		0	0	0		1	0	0	0	0	0	0	0	0	1	0	0	0	0	0	0	0	0	0	0	0	0	0	0	0	0	0	0	0	0	0	0	0	0
#6_exvivo_cluster_123	12			0	1	1	0	0	0	0	1	0	0	0		0	0	1	0	0	0	0	0	0	0	0	0	0	1	0	0	0	0	0	0	0	0	0	0	0	0	0	0	0	0	0	0	0	0
			Hit Rate:	0.215385	0.450549	0.462088	0.215385	0.0620879	0	0.0912088	0.462088	0	0	0.0104396	0.0291209	0.247802	0	0.305495	0	0	0	0	0	0	0.11044	0.0406593	0	0	0.17033	0	0	0	0	0	0.0291209	0.0192308	0.0406593	0	0	0	0.0291209	0	0.0192308	0	0	0	0	0	0
Suggested Composition
Sample_ID
#6_exvivo_cluster_149	NTSA	DBLa1
#6_exvivo_cluster_67
#6_exvivo_cluster_90	NTSB	DBLa0.18	CIDRa6	DBLb5
#6_exvivo_cluster_142	NTSB	DBLa0.18	CIDRa4	DBLd1
#6_exvivo_cluster_143	NTSB3	DBLa2	CIDRa1.1	DBLb3	DBLg4
#6_exvivo_cluster_40	NTSB	DBLa0.9	CIDRa2.1	DBLd1
#6_exvivo_cluster_137
#6_exvivo_cluster_66		DBLa0.5	CIDRa2.9	DBLb8	DBLd1	CIDRb1
#6_exvivo_cluster_20
#6_exvivo_cluster_28	NTSB3	DBLa0.5	CIDRa2.6	DBLd1	CIDRb
#6_exvivo_cluster_56
#6_exvivo_cluster_53		DBLa0.16	CIDRa3.4	DBLd1	CIDRb1
#6_exvivo_cluster_168	NTSB3	DBLa0.10	CIDRa2.2	DBLd1	CIDRb
#6_exvivo_cluster_19	NTSB3	DBLa0.1	CIDRa3.2	DBLd1	CIDRb5
#6_exvivo_cluster_150	NTSA7	DBLa1.2	CIDRa1.7
#6_exvivo_cluster_138	NTSA1	DBLa1.1	CIDRa1.2	DBLb11	DBLg1	DBLe1	DBLg1	DBLz	DBLe1	DBLg1
#6_exvivo_cluster_130	NTSB	DBLa0.18	CIDRa6	DBLb5
#6_exvivo_cluster_68	NTSB3	DBLa0.11	CIDRa2.4	DBLd1
#6_exvivo_cluster_101	NTSB3	DBLa0.12	CIDRa2.1	DBLb5	DBLg	DBLz	DBLe
#6_exvivo_cluster_105
#6_exvivo_cluster_8	NTSB3	DBLa0.1	CIDRa3.2	DBLd1	CIDRb5
#6_exvivo_cluster_131	NTSB7	DBLa0.4	CIDRa3.1	DBLd1	CIDRb1
#6_exvivo_cluster_161	NTSA4	DBLa1.5	CIDRd1
#6_exvivo_cluster_102	NTSB3	DBLa2	CIDRa1	DBLb12	DBLg
#6_exvivo_cluster_123	NTSB3	DBLa0.6	CIDRa3.1	DBLd1	CIDRb1
[truncated: 177 more columns]

## Sheet: #6_1st in vitro
	Total reads	Singletons
	3323	155
						Position D1	Position D1	Position D2	Position D2	Position D2	Position D2	Position D3	Position D3	Position D3	Position D3	Position D3	Position D4	Position D4	Position D4	Position D4	Position D4	Position D4	Position D4	Position D4	Position D5	Position D5	Position D5	Position D5	Position D5	Position D5	Position D5	Position D5	Position D6	Position D6	Position D6	Position D6	Position D6	Position D6	Position D6	Position D6	Domain 07	Domain 07	Domain 07	Domain 07	Domain 07	Domain 07	Domain 07	Domain 07	Domain 08
Sample_ID	Cluster_size	Blast_cluster_sequnece	Best Blast hit	E-value	# hits in varDB	NTSA	NTSB	DBLa0	DBLa1	DBLa2	DBLpam1	CIDRa1	CIDRa2-6	CIDRb	CIDRg	CIDRd	DBLb	DBLg	DBLd	DBLe	DBLz	CIDRb	CIDRg	CIDRd	DBLb	DBLg	DBLd	DBLe	DBLz	CIDRb	CIDRg	CIDRd	DBLb	DBLg	DBLd	DBLe	DBLz	CIDRb	CIDRg	CIDRd	DBLb	DBLg	DBLd	DBLe	DBLz	CIDRb	CIDRg	CIDRd	DBLb
#6_1st_invitro_cluster_107	384	GTGATATTATAAGAGGAAAGGATCTGTATCTCGGTAATCCGCAAGAAAGTGCACAAAGAGATAAATTAGAAAAGAATTTGAAAGAAATTTTCGAGAAAATACATAGTGGATTGGATGATAAAATAAAATCAAAGTATAATGGTGATACTGAAAATTATTATCAATTAAGGGAAGATTGGTGGTATGCTAATCGAGAAACAGTATGGAAAGCCATCACGTGTGAAGTTAAGAGTGGTTCTGACTATTTTCGACCAACATGTGGTGGTGATAGTGAAAGTCCATCTCAAGCTCATGACAAATGCCGATGTCCCAATGGTAAAAATGCCGACCAGGTTCCCACCTATTTCGATTATGTGCCACAATATTTGAGA	DBLa0.5	0	1	0	0	1	0	0	0	0	1	0	0	0	1	0	0	0	0	0	0	0	0	0	1	0	0	0	0	0	0	0	0	0	0	1	0	0	0	0	0	0	0	0	0	0	0
#6_1st_invitro_cluster_154=cluster 90ev	334	GAGACATTGTACGAGGAAAAGATCTTTTCCTCGGTAATGATaaagaaaaagaaaaaagaaaaCAATTAGAAAAGGAATTGAAAGATATTTTCAAGAATATATATGACAAATTGAAGAATGGGAAGACGAATGGCGCAGAAGCACGCTACAAAGATACTGATAATTATTATGAATTAAGAGAAGATTGGTGGACAGAGAATCGAGAAACAGTATGGAAAGCATTAACATGCAAGGCTGACGATAGTAATAGATATTTTCGACCAACATGTGCTGGAGGAACAACTTCAACTCAAGGTAAATGCCGATGTAACGACAACCAGGTCCCCACATATTTTGACTATGTGCCGCAGTATCTTCGC	DBLa0.12	0	4	0	3	3	0	0	0	0	3	0	0	0	3	0	0	0	0	0	0	0	0	3	0	0	0	0	0	0	0	0	0	0	3	0	0	0	0	0	0	2	0	0	0	0	0
#6_1st_invitro_cluster_66	191	AGATATTATAAGAGGAAAAGATCTATTTCGTGGTTATGATGATgaagaaaaaaaaccgaagagaaaaattagaaaataagttgaaagaaaTTTTCAAGAATATATATAAGGACGTGATGAAGACGAGCGGGAGTAATGGGCAGAAGTCGGCGGAAGCAAAAGATCGCTACAAAGATACTAAAAATTATTATCAATTACGAGAAGATTGGTGGGACGCAAATCGCGCCAAAGTATGGTATGCTATGACGTGTGGTGCAGGACAAAATGATAAATATTTTCGACAATCATGTTCTGGTGGAAAAACTTGGACTAATGAAAAATGCCGATGCGTAAACCGTGCAGATGTTCCCACATATTTCGATTATGTGCCGCAGTTTCTTCGC	DBLa0.9	0	3	0	3	3	0	0	0	0	3	0	0	0	0	0	3	0	0	0	0	0	0	0	0	0	0	2	1	0	0	0	0	0	0	0	0	0	0	0	0	0	0	0	0	0	0
#6_1st_invitro_cluster_33=cluster 19ev	180	GTGATATCGTACGCGGCAAAGATCTTTTCCTTGGTAATACATATGAAAGTGCACAAAGAGATAAATTAGAACAGAAATTGAAAGATATTTTCAAGGAAATACATGAGGACGTGATGAAGAACAACGGGGCGTTACAAGCTCGATACACAGATAATAAAAATTATTATCAATTACGAGAAGATTGGTGGAATGCAAATCGCTCCACAGTATGGAAAGCATTAACATGTGACCACAGGCTAGCAAGTGCTTCATATTTTCGACCAACGTGCAGTATGAATGGAAGTTGTTCTCAAGCTAATAAATACTGCCGGTGTAACGGCGACCAGCCAGGTAACGACAAGGAAAATACCGATCCCCCAACCTATTTTGACTATGTACCGCAGTTTCTTCGC	DBLa0.1	3.19754e-137	4	0	3	3	0	0	0	0	3	0	0	0	0	0	2	0	0	0	0	0	0	0	0	0	0	1	0	0	0	0	0	0	0	0	0	0	0	0	0	0	0	0	0	0	0
#6_1st_invitro_cluster_208=cluster 137ev	166	GCGATATTGTAAGAGGAAAAGATCTATATAGTGGTAATAACaaagaaaaagttaaattagaaaagaaattaaaaaGAATTTTCGGGATAATATATGGAAAATTGAATGGTGTAAAAGACCACTACAAAGATGCAACTGGAGATTTTTTTAAATTAAGAGAAGATTGGTGGACTGCTAATAGAAACGATGTATGGAAAGCATTAACATGTAACGCTCAAGGTAATACATATTTTCGACAAACAGCGTGTGCAGGAACGCGGACTAATGACAAATGCCGATGTGACGACAAGGCAAATGTCGATCCCCCAACCTATTTCGATTATGTGCCGCAGTATCTTCGC	DBLa0.8	2.85985e-122	1	0	0	0	0	0	0	0	0	0	0	0	0	0	0	0	0	0	0	0	0	0	0	0	0	0	0	0	0	0	0	0	0	0	0	0	0	0	0	0	0	0	0	0	0
#6_1st_invitro_cluster_215=cluster 142ev	154	GTGATATTATTCGTGGAAAAGATCTTTATCGTGGAAATAAACAAGAAAAAGATGCATTACAAGAGCAATTAAAGAAATATTTCAAGCAATTACATATTAATTTGCAACATCCAGCAAAAAGCCATTATAATGACCCAAGCGGAAATTTTTATCAACTAAGGGAAGATTGGTGGAATGCCAATAGGCAAGAAATATGGAAAGCTATTACATGCAAGGCAACTGATACTCAATATTTTAGAAATACATGTTCTGGTGGTGAAAGTCCGACAACTGTAGAATGTCACTGCATTGATGGAACTGTCCCTACAAATTTAGATTATGTCCCTCAATTTTTACGT	DBLa0.18	0	18	0	9	12	0	0	0	0	12	0	0	0	3	0	9	0	0	0	0	0	0	0	2	0	0	6	2	0	0	0	0	0	0	2	0	0	0	0	0	0	0	0	0	0	0
#6_1st_invitro_cluster_222=cluster 149ev	152	GCGATATTATCAGAGGAAGAGATATGTTTAAATCTAATGGAAAAGTAGAAAAAGCTCTAAGAGAAGTTTTCAAGAAAATACATAGTGGTTTGAATAAAAGCAAAATTAATGATTATGATCATGATGGTACTGGAAACTACGTAAAATTAAGGGAAGATTGGTGGACGGCTAACCGCGATCAAGTATGGAAAGCATTAACATGTTCTGCACCGTATGATGCTAACTATTATCGAAAATATTCAGATAAAAGTATGGATTTTACAAGTCAAGGACAATGTGGCCACACGGAAGGAACTGTTCCTACAAATCTTGATTATGTCCCTCAATTTTTAAGA	DBLa1.7	0	62	39	0	0	40	0	0	18	0	2	1	20	28	13	0	0	0	0	0	0	14	20	5	1	0	0	0	0	0	13	13	3	0	3	1	0	3	1	3	0	1	10	1	1	1
#6_1st_invitro_cluster_94=cluster 56ev	152	GTGATATCATACGAGGAAGAGATCTTTTCCTCGGTAATGATAAAGAAAAAGATCAAAGAAAACAATTAGATGATAATTTGAAAGATATTTTCGCGAAAATATATGACAATTTGGGTAAGAATAAGGAGGATGCAAAAGGACACTACGGAGGTGATAAAGATTTCTTTCAATTACGAGAAGACTGGTGGGATGCTAATAGAAAAGAGGTATGGAAAGCATTAACATGCGGTGCGCCAGAAGGTGCTTCATATTTTCGTGCAACATGTAGTGGAGGAAATCTAACATATAACAAATGCCGTTGTCAGAAGAAAGACGGCAAAAGTGAGACCGACCAGGTCCCCACCTATTTTGACTATGTGCCGCAGTATCTTCGC	DBLa0.5	5.52971e-80	1	0	0	0	0	0	0	0	0	0	0	0	0	0	0	0	0	0	0	0	0	0	0	0	0	0	0	0	0	0	0	0	0	0	0	0	0	0	0	0	0	0	0	0	0
#6_1st_invitro_cluster_42= cluster 28ev	143	GAGATATTGTCAGAGGAAAAGATCTATTTTATGGAAATACAcaagaaaaagatcaaagaaaaaaattacaacaaaatttgaaaaaaattttcgagaaaaTACATGGTAACGTGACGAGCGACAAGAATGGGCAGGCTCTAAAAACACGCTACGAAGGTGATaaaaaaaaTTATTTTTATCAATTAAGGGAAGATTGGTGGGACGCGAATCGGCACACCGTGTGGGAAGCCATGACATGCAGCGACAAGCTAAAAAATTCTGCATATTTTCGACCAACGTGCGATAGTAGTGATGAAAAAAATTCAACTCTTGCTAGTAACAAATGCCGATGTCCCAATGGTAACAACCAGGTCCCCACATATTTTGACTATGTGCCACAGTATCTTCGC	DBLa0.5	0	35	0	29	33	0	0	0	0	33	0	0	0	0	0	31	0	0	0	0	0	0	0	0	0	0	22	7	0	0	0	0	1	1	0	0	0	0	0	0	2	0	0	0	0	0
#6_1st_invitro_cluster_109	141	TGATATCGTACGCGGTAAAGATCTTTTCCTTGGTAATACATATGAAAGTGCACAAAGAGAAAAATTAGAGAAGAATTTGAAAGATATTTTCACGCAAATATATAATGACGTGACAAATGATCAGACGAAGAAGGCGGAAGCAGAAAAACGCTACAATGATACTACAAATTATTTTCAATTAAGAGAAGACTGGTGGGCACTTAATAGAGAAACGGTATGGAAAGCCATAACATGTAGCGAGGACCTAAAAAAATTCTTCATATTTTCGAGCAACATGTGGTAGTAGTGGAGAAACTCCGACTGATGATAAATGCCGATGTAGCGACAACCAAGTCCCCACATATTTTGACTACGTGCCACAGTATCTTCGC	DBLa0.5	0	1	0	0	1	0	0	0	0	1	0	0	0	1	0	0	0	0	0	0	0	0	0	1	0	0	0	0	0	0	0	0	0	0	1	0	0	0	0	0	0	0	0	0	0	0
#6_1st_invitro_cluster_106=cluster 77 2nd	140	AGATATTGTAAGAGGAAGAGATTTGTATGGTGGTAATAAACaagaaaaagaaaaaagagatgaattagagaagaatttacaaaaaaaTTTTTAGGAATATATATGACAAATTATTAGAGTATAACAAGACGAATGGGGAGATAGAAGCTCGCTACGGAAGTGATAAAGATCCAAATTTCTTTCAATTACGAGAAGATTGGTGGGACGCTAATAGAGAAAAAGTATGGAAAGCTATCACATGTAAAGCAAATGATGATGATAAATATTTTAGAAAAACAGCGTGTGCAGGAAAAACTCCGACTGATGATAAATGCCGGTGTAACGACGACCAGGTCCCCACCTATTTTGACTACGTCCCTCAGTATCTTCGC	DBLa0.11	0	3	0	3	3	0	0	0	0	3	0	0	0	0	0	3	0	0	0	0	0	0	0	0	0	0	2	1	0	0	0	0	0	0	0	0	0	0	0	0	0	0	0	0	0	0
#6_1st_invitro_cluster_84=cluster 53ev	113	AGATATTGTAAGAGGAAAAGATCTGTATCTCGGTTATGATGAtaaagaaaaaaaccgaagacaaaaaaatagaagagaatttgaaagaaattttcgggaaaaTACATAGTGAAGTGACGAGCGACAAGAATGTGGAGCTACAAAAACGCTACAAAGATATTAATGATCCAAATTTTTATAAATTACGAGAAGATTGGTGGACAGCGAATAGGCACACCGTGTGGGAAGCTATCACGTGCAAGGCGGAGCAGAATAATAAATATTTTAGAAAAACAGCGTGTGCAGGAAAAACTCCGAATCAAGGTCGATGCCGATGTGACGACATTCCAAATACCGATCCCCCAACCTATTTTGATTATGTGCCACAGTTTCTTCGC	DBLa0.16	0	2	0	0	1	0	0	0	0	1	0	0	0	0	0	1	0	0	0	0	0	0	0	0	0	0	1	0	0	0	0	0	0	0	0	0	0	0	0	0	0	0	0	0	0	0
#6_1st_invitro_cluster_9=cluster 8ev	105	GAGATATTGTGAGAGGAAGAGATCTTTTTATAGGTTATAATcaaaaagatagagaacaaaaacaaaaaatacaagataatttgaaagatattttcaagaaaaTACATAAGGAAGTGACGAACAGGAAGACGAATGAAGAGGCAGCAAAAGCTCGCTACGGAAATGATCCTAAAGAAAATTATTATCAATTACGAGAAGATTGGTGGGATGCGAATCGGGGCACAATCTGGAAAGCCATCACATGTGACGTTAAGGGTAATAGATATTTTCGAGCAACGTGCAATAGTGGTGATAGTCAAGGTCCATCTCAAGCTCAAAACCAATGCCGATGTCCCATGACAAGTGATGGCAAGCCCAACGACCAAGTCCCCACATATTTTGACTATGTTCCACAATATT…	DBLa0.8	0	4	0	4	4	0	0	0	0	4	0	0	0	2	0	2	0	0	0	0	0	0	2	0	0	0	1	0	0	0	0	2	0	0	0	0	0	0	0	0	0	0	2	0	0	0
#6_1st_invitro_cluster_239	99	AGACATTATACGAGGAAAAGATCTGTATCGTCGTGATAATAAAAAAGATAAATTAGAAGAGAATTTACAAAAAAATTTTCAAGAAAATACATGACAAATTGGATAATAGCATAAAATCAAACTATAATGATGCTCCATATTATTATAAATTACGAGAAGATTGGTGGTATGCTAATAGAATAATGGTATGGAACGCGATAACATGCGGCGTTAAGGGTAATAAATATTTTCGACCAACATGTGTTTCAGGAGAATCGACTAAAGAGAATTGCCAATGTACTAGTTATAAGGTCCCCACATATTTCGATTATGTGCCGCAGTATCTTCGC	DBLa0.9	0	19	0	15	18	0	0	0	0	18	0	0	0	0	0	17	1	0	0	0	0	0	0	0	0	1	15	2	0	0	0	0	2	2	0	0	0	0	0	0	2	0	0	0	0	0
#6_1st_invitro_cluster_194=cluster 130ev	79	TGATATTATAAGAGGAAAGGATCTTTATCTTGGAAATAGCaaagaaaaagaaaaattagaaaaaaatttaagacaaattttcaaaaaaaTATATGACAAATTGACACATGATGCACAAACTCACTACAAAAAAGATGATAAAGGAAGTGGAAATTATTTTCAATTAAGAGAAGATTGGTGGAATGCCAATAGACAACAAGTTTGGAAAGCCATTACATGCAAAGCGGAAAATGCTCAATATTTTAGAAATACCTGTTCTATGGAAAAAAATTCTACGCAAACAAACTGTCAATGTATTGATGGAGAAGTTCCTACATATTTCGATTATGTGCCTCAATATTTACGT	DBLa0.18	0	3	0	2	2	0	0	0	0	2	0	0	0	2	0	0	0	0	0	0	0	0	1	0	0	1	0	0	0	0	0	0	1	1	0	0	0	0	0	0	1	0	0	0	0	0
#6_1st_invitro_cluster_52	66	TGATATCGTACGCGGCAAAGATCTTTTCCTTGGTAATACATATGAAAGTGCACAAAGAGATCAATTAGAGAAGAATTTGAAAGATATTTTCGCGAAAATACATAGTGAAGTGAGGAGAGGGAGTAATTGGCAGGCTCTAAAAACACGCTACGAAAATGATAATGAAAATTATTATCAATTACGAGAAGATTGGTGGACTGCGAATCGCGCCACAATCTGGGAAGCTATCACGTGCAACGACGACAAGAAGCTAGCAAGTGCTTCATATTTTCGAGAAACGTGCAGTGATCGTAATGGAAATAGTCAGTATCAAACTCAAAACCAATGCCGATGTAGCGACAACCAGGTCCCCACATATTTTGAATATGTGCCACAGTATCTTCGC	DBLa0.11	0	3	0	3	3	0	0	0	0	3	0	0	0	0	0	3	0	0	0	0	0	0	0	0	0	0	2	1	0	0	0	0	0	0	0	0	0	0	0	0	0	0	0	0	0	0
#6_1st_invitro_cluster_153 = cluster 68 ev	63	GAGATATCGTACGCGGCAAAGATCTTTTTATAGGTTATAATgaaaaagatcaagaagaaaaaagaaaattacaagagaacttgagaaaaaTTTTCAAGGAAATATATAATAAATTGGGGGATACTGGAGCACAAGAACGCTACGAAGGTGATGAAGCCAATGATTTTTTTAAATTACGAGAAGATTGGTGGGATGCTAATAGACTAGAAGTATGGAAAGCTATCACTTGTGGTGCAGGAGAAAGTGATAAATATTTTAGAAAAACATGTTCTTCCGGAAATTCTAAGACGAGTGGACATTGTAAGTGTATTGATGGAACAGTTCCTACCAACTTGGATTATGTTCCTCAATATTTGAGA	DBLa0.12	0	4	0	3	3	0	0	0	0	3	0	0	0	3	0	0	0	0	0	0	0	0	3	0	0	0	0	0	0	0	0	0	0	3	0	0	0	0	0	0	2	0	0	0	0	0
#6_1st_invitro_cluster_216	61	TGATATTATTCGCGGCAAAGATCTTTATATTCGTAATAAACAAGAAAAAGATAGATTAGAAGAGAATTTACAAAAAATTTTCGGGCATATATATGAAGAATTGACGAACGGCGCACAAACTTACTACAATGATGATAAAGAAAATTATTATAAATTAAGGGAAGATTGGTGGAACGCTAATAGACAACAAGTATGGAATGCTATAATATGTGGTGTAGaaaaaaaaCGAGAAATATTTTAAAAACACATGTTCATCTAAAGGTGGGCATTATGAAAAATGCCGATGTATTAATGGCGACGTTCTTACGAATTTCGATTATGTTCCGCAGTATCTTCGC	DBLa2	1.21205e-180	5	0	3	0	0	4	0	4	0	0	0	0	4	0	0	0	0	0	0	0	0	3	0	0	0	0	0	0	0	0	0	1	1	0	0	0	0	0	0	2	0	0	0	0	0
#6_1st_invitro_cluster_196=cluster 131 ev	52	CGATATTGTAAGAGGAAAAGATCTTTTTCTTGGTCATAGCAAAGAAAAAGAAAAATTAGAACAAAATTTGAAAAATCTTTTCAAGCAATTATATGAAGAATTAAAGAAGCATGATACCACGATaaaaaaaaCTTACGAAAAATACGGTCCAGATTTTTATCAATTACGAGAAGATTGGTGGAATAATAATAGAATAATGGTATGGTATGCTATAACGTGTGGTGCAACAGATGGTGATAAATATTTTAGAGAATCATCTTCTGATAAAGGTGGCACTTATGAAAAATGCCGATGTTCTAGTCATAAGGTCCCCACATATTTTGACTATGTGCCGCAGTATCTTCGC	DBLa0.4	0	4	0	4	4	0	0	0	0	4	0	0	0	0	0	4	0	0	0	0	0	0	0	0	0	0	4	0	0	0	0	0	0	0	0	0	0	0	0	0	0	0	0	0	0	0
#6_1st_invitro_cluster_195	40	TGATATTATTCGAGGAAAAGATCTATTTCTTGGTAATAATAaagaaaaaaagcaattagaagagaatttaaaaaaaattttcaaagaaaTATATGACAATTTGAAGAATACTGATGTACAAGAACACTACAAAGATGATGATAAAGTAACTAAAAATTATTATAAATTAAGGAATGATTGGTGGGAAGCTAATAGACAAGAAGTATGGAAAGCTATCACATGTGGCGCTGCGGGTGGTACATATTTTAGAAATACATGTGTTGGGGGAAATGAAACTGAAAGTAACTGCCGATGTAAGACAAATTATGTTCCTACATATTTTGACTACGTGCCGCAGTATCTTCGC	DBLa0.8	0	3	0	1	3	0	0	0	0	3	0	0	0	3	0	0	0	0	0	0	0	0	0	2	0	0	0	0	0	0	0	0	0	0	2	0	0	0	0	0	0	0	0	0	0	0
#6_1st_invitro_cluster_223=cluster 150ev	40	GAGATATTGTAAGAGGAAGAGATATGTTTAAATCTAATGAAATGGTAGAAATCGGTCTAAAAAAGGTTTTCAAGAAAATACATGGTAAATTAAATGGAGCTGCAATATCATATTACGATGCTGATGAAAAAGGAAATTTTTATAAATTAAGAGAAGCATGGTGGAATGTGAATAGAAATAAAGTATGGGAAGCCATAACATGTAAAGCTCCACAAAAAGCTAATTATTTTAGAAAAGGTTCAGATGGTAGTGATGTTTTTACAAGTCAAGGATATTGTGGTCGTAAGGAACTAACCGTTCCTACCTATTTAGATTACGTCCCTCAATTTTTACGT	DBLa1.2	0	97	66	0	0	69	0	0	73	0	0	0	0	2	29	0	0	12	0	0	0	1	39	1	0	0	0	0	0	0	35	1	0	0	1	0	0	1	13	18	0	0	1	0	0	0
#6_1st_invitro_cluster_209	27	TGATATTGTAAGAGGAATAGATATGTTTAAACCAAATGTCCATGACAAAGTAGAAAAGGGTCTCCGAGAGGTTTTCAAGAAAATACATGATGAAATGGAAGGTGAGGTAAAAAATTATTACAATCCTGATGGATCTGGAAATTATTATAAATTAAGAGAAGCATGGTGGGATGTGAATAGAAATAAAGTATGGGAAGCCATAACCTGTGGCGCACTACCTAAATCTGCATATTTCTTGCAATCAGAAGATAATAAACAATTATTTTTATATCCTAAATGCGGCCATAATAATAAGAATGATCTTCCTACCAATTTAGATTATGTTCCTCAATATTTACGT	DBLa1.1	0	200	149	0	0	157	0	0	155	2	0	0	0	155	0	0	0	0	0	0	0	0	145	0	0	0	0	0	0	0	0	0	129	0	0	0	0	0	112	0	0	0	0	0	0	0
#6_1st_invitro_cluster_108	25	TGATATTATTCGCGGCAAAGATCTTTTTATAGGTTATAATGaaaaagatagagaagaaaaaaaacaattacaagataatttaaaagatattttcaagaaaaTATATGAAGAATTGTCGAGGACGAATGGAGAGGCAGCAAAAAAAGCACTACGAAGATAAGGATACTGACAAAAATTTTTTTCAATTACGAGAAGATTGGTGGGCTCTTAATAGAGACCAAGTATGGAAAGCTATCACATGCAGTGCTGGAGAGAATGATATATATTCAAAAACCACCGATAATGGTAAAACGACTGTTTTGTATTATAAATGCGGTCATGAGGATGAAAACGTTGCAACAAACTTGGATTACGTCCCTCAATTTTTACGA	DBLa0.6	0	4	0	3	3	0	0	0	0	3	0	0	0	3	0	0	0	0	0	0	0	0	2	0	0	0	0	0	0	0	0	2	0	0	0	0	0	0	0	0	0	0	2	0	0	0
#6_1st_invitro_cluster_232=cluster 161 ev	18	TGATATTATAAGAGGTAGAGATATGTTTCTTGGTAATAATGaaaaagatatgagagaaaaacagaaactgcaaaataatttaaaaaacatttttgggaaaaTTATGGAAAGTGATACAAATCTGAACACACAATCACTGGAAAAAGTTAGGGAATACTGGTGGGCGCTTAATAGAGAAGACGTATGGAAAGCATTAACATGTTCTGCGGATGGCAGTGAAGAATATTTCAAAAAACCAAGCAGCGATGAATACTCATTCTCAAATGGTCAATGCGGTCATAGGGATGAAAACGTCCCAACATATTTAGATTACGTCCCTCAATATTTACGT	DBLa1.5	0	23	17	0	0	17	0	0	0	0	1	0	16	6	10	1	0	0	0	0	0	3	8	4	0	0	1	0	0	1	0	8	0	0	4	0	0	2	1	0	0	0	7	1	0	0
#6_1st_invitro_cluster_203	11	GAGATATTGTAAGAGGAAGAGATTTGTATGGTGGTAATAGCaaagaaaaagttaaattagaaaaaaaattaaaagaaaTTTTCGGGATAATATATGGAAAATTGACGGATCAAAGAGCAAAAGAACGGTACAAAGATGAAGCCaaaaaaaaTTATTTTCAATTAAGAGAAGATTGGTGGACAGCGAATCGCGCCACAGTATGGGAAGCTATCACGTGCGGATATCCGGGTGGTACATATTTTCGTGCAACGTGCAATGGAGAAAAACGAACTAAAGGTGACTGCCGATGTCCCAATGGAGACCAAGTCCCCACATATTTTGACTACGTGCCACAATATTTGAGA	DBLa0.8	0	4	0	4	4	0	0	0	0	4	0	0	0	2	0	2	0	0	0	0	0	0	2	0	0	0	1	0	0	0	0	2	0	0	0	0	0	0	0	0	0	0	2	0	0	0
#6_1st_invitro_cluster_212	11	AGATATTGTAAGAGGAAGAGATTTGTATGGTGGTAATAACAAAGAAAAAGTTAAATTAGAAAAGAAATTAAAAAGAATTTTCGGGATAATATATGGAAAATTGAATGGTGTAAAAGACCACTACAAAGATGCAACTGGAGATTTTTTTAAATTAAGAGAAGATTGGTGGACTGCTAATAGAAACGATGTATGGAAAGCATTAACATGTAACGCTCAAGGTAATACATATTTTCGACAAACAGCGTGTGCAGGAACGCGGACTAATGACAAATGCCGATGTGACGACAAGGCAAATGTCGATCCCCCCACCTATTTCGATTATGTGCCACAATATTTGAGA	DBLa0.8	1.30821e-130	1	0	0	0	0	0	0	0	0	0	0	0	0	0	0	0	0	0	0	0	0	0	0	0	0	0	0	0	0	0	0	0	0	0	0	0	0	0	0	0	0	0	0	0	0
					# hits in varDB	NTSA	NTSB	DBLa0	DBLa1	DBLa2	DBLpam1	CIDRa1	CIDRa2-6	CIDRb	CIDRg	CIDRd	DBLb	DBLg	DBLd	DBLe	DBLz	CIDRb	CIDRg	CIDRd	DBLb	DBLg	DBLd	DBLe	DBLz	CIDRb	CIDRg	CIDRd	DBLb	DBLg	DBLd	DBLe	DBLz	CIDRb	CIDRg	CIDRd	DBLb	DBLg	DBLd	DBLe	DBLz	CIDRb	CIDRg	CIDRd	DBLb
				Sample_total:	509	271	92	104	283	4	0	250	106	3	1	36	218	52	78	1	12	0	0	0	18	228	16	1	2	58	14	0	1	48	28	137	11	14	1	0	6	127	21	11	1	24	2	1	1
Interpreded Results				Position D1	Position D1	Position D2	Position D2	Position D2	Position D2	Position D3	Position D3	Position D3	Position D3	Position D3	Position D3	Position D4	Position D4	Position D4	Position D4	Position D4	Position D4	Position D4	Position D4	Position D5	Position D5	Position D5	Position D5	Position D5	Position D5	Position D5	Position D5	Position D6	Position D6	Position D6	Position D6	Position D6	Position D6	Position D6	Position D6	Domain 07	Domain 07	Domain 07	Domain 07	Domain 07	Domain 07	Domain 07	Domain 07	Domain 08	Domain 08
Sample_ID	Cluster_size			NTSA	NTSB	DBLa0	DBLa1	DBLa2	DBLpam1	CIDRa1	CIDRa2-6	CIDRb	CIDRg	CIDRd	CIDRa1.2-3	DBLb	DBLg	DBLd	DBLe	DBLz	CIDRb	CIDRg	CIDRd	DBLb	DBLg	DBLd	DBLe	DBLz	CIDRb	CIDRg	CIDRd	DBLb	DBLg	DBLd	DBLe	DBLz	CIDRb	CIDRg	CIDRd	DBLb	DBLg	DBLd	DBLe	DBLz	CIDRb	CIDRg	CIDRd	DBLb	DBLg
#6_1st_invitro_cluster_107	384			0	0	1	0	0	0	0	1	0	0	0		1	0	0	0	0	0	0	0	0	0	1	0	0	0	0	0	0	0	0	0	0	1	0	0	0	0	0	0	0	0	0	0
#6_1st_invitro_cluster_154=cluster 90ev	334			0	1	1	0	0	0	0	1	0	0	0		1	0	0	0	0	0	0	0	0	1	0	0	0	0	0	0	0	0	0	0	1	0	0	0	0	0	0	1	0	0	0	0	0	0
#6_1st_invitro_cluster_66	191			0	1	1	0	0	0	0	1	0	0	0		0	0	1	0	0	0	0	0	0	0	0	0	0	0	0	0	0	0	0	0	0	0	0	0	0	0	0	0	0	0	0	0	0	0
#6_1st_invitro_cluster_33=cluster 19ev	180			0	1	1	0	0	0	0	1	0	0	0		0	0	1	0	0	0	0	0	0	0	0	0	0	1	0	0	0	0	0	0	0	0	0	0	0	0	0	0	0	0	0	0	0	0
#6_1st_invitro_cluster_208=cluster 137ev	166
#6_1st_invitro_cluster_215=cluster 142ev	154			0	1	1	0	0	0	0	1	0	0	0		0	0	1	0	0	0	0	0	0	0	0	0	0	0	0	0	0	0	0	0	0	0	0	0	0	0	0	0	0	0	0	0	0	0
#6_1st_invitro_cluster_222=cluster 149ev	152			1	0	0	1	0	0	0		0	0	0		0	0	0	0	0	0	0	0	0	0	0	0	0	0	0	0	0	0	0	0	0	0	0	0	0	0	0	0	0	0	0	0	0	0
#6_1st_invitro_cluster_94=cluster 56ev	152
#6_1st_invitro_cluster_42= cluster 28ev	143			0	1	1	0	0	0	0	1	0	0	0		0	0	1	0	0	0	0	0	0	0	0	0	0	1	0	0	0	0	0	0	0	0	0	0	0	0	0	0	0	0	0	0	0	0
#6_1st_invitro_cluster_109	141			0	0	1	0	0	0	0	1	0	0	0		1	0	0	0	0	0	0	0	0	0	1	0	0	0	0	0	0	0	0	0	0	1	0	0	0	0	0	0	0	0	0	0
#6_1st_invitro_cluster_106=cluster 77 2nd	140			0	1	1	0	0	0	0	1	0	0	0		0	0	1	0	0	0	0	0	0	0	0	0	0	0	0	0	0	0	0	0	0	0	0	0	0	0	0	0	0	0	0	0	0	0
#6_1st_invitro_cluster_84=cluster 53ev	113			0	0	1	0	0	0	0	1	0	0	0		0	0	1	0	0	0	0	0	0	0	0	0	0	1	0	0	0	0	0	0	0	0	0	0
#6_1st_invitro_cluster_9=cluster 8ev	105			0	1	1	0	0	0	0	1	0	0	0		0	0	0	0	0	0	0	0	0	0	0	0	0	0	0	0	0	0	0	0	0	0	0	0	0	0	0	0	0	0	0	0	0	0
#6_1st_invitro_cluster_239	99			0	1	1	0	0	0	0	1	0	0	0		0	0	1	0	0	0	0	0	0	0	0	0	0	1	0	0	0	0	0	0	0	0	0	0	0	0	0	0	0	0	0	0	0	0
#6_1st_invitro_cluster_194=cluster 130ev	79			0	1	1	0	0	0	0	1	0	0	0		1	0	0	0	0	0	0	0	0	0	0	0	0	0	0	0	0	0	0	0	0	0	0	0	0	0	0	0	0	0	0	0	0	0
#6_1st_invitro_cluster_52	66			0	1	1	0	0	0	0	1	0	0	0		0	0	1	0	0	0	0	0	0	0	0	0	0	0	0	0	0	0	0	0	0	0	0	0	0	0	0	0	0	0	0	0	0	0
#6_1st_invitro_cluster_153 = cluster 68 ev	63			0	1	1	0	0	0	0	1	0	0	0		1	0	0	0	0	0	0	0	0	1	0	0	0	0	0	0	0	0	0	0	1	0	0	0	0	0	0	1	0	0	0	0	0	0
#6_1st_invitro_cluster_216	61			0	1	0	0	1	0	1		0	0	0		1	0	0	0	0	0	0	0	0	1	0	0	0	0	0	0	0	0	0	0	0	0	0	0	0	0	0	0	0	0	0	0	0	0
#6_1st_invitro_cluster_196=cluster 131 ev	52			0	1	1	0	0	0	0	1	0	0	0		0	0	1	0	0	0	0	0	0	0	0	0	0	1	0	0	0	0	0	0	0	0	0	0	0	0	0	0	0	0	0	0	0	0
#6_1st_invitro_cluster_195	40			0	1	1	0	0	0	0	1	0	0	0		1	0	0	0	0	0	0	0	0	0	1	0	0	0	0	0	0	0	0	0	0	1	0	0	0	0	0	0	0	0	0	0	0	0
#6_1st_invitro_cluster_223=cluster 150ev	40			1	0	0	1	0	0	1		0	0	0		0	0	0	0	0	0	0	0	0	0	0	0	0	0	0	0	0	0	0	0	0	0	0	0	0	0	0	0	0	0	0	0	0	0
#6_1st_invitro_cluster_209	27			1	0	0	1	0	0	0		0	0	0	1	1	0	0	0	0	0	0	0	0	1	0	0	0	0	0	0	0	0	0	1	0	0	0	0	0	1	0	0	0	0	0	0	0	0
#6_1st_invitro_cluster_108	25			0	1	1	0	0	0	0	1	0	0	0		1	0	0	0	0	0	0	0	0	1	0	0	0	0	0	0	0	0	1	0	0	0	0	0	0	0	0	0	0	1	0	0	0	0
#6_1st_invitro_cluster_232=cluster 161 ev	18			1	0	0	1	0	0	0		0	0	1		0	0	0	0	0	0	0	0	0	0	0	0	0	0	0	0	0	0	0	0	0	0	0	0	0	0	0	0	0	0	0	0	0	0
#6_1st_invitro_cluster_203	11			0	1	1	0	0	0	0	1	0	0	0		0	0	0	0	0	0	0	0	0	0	0	0	0	0	0	0	0	0	0	0	0	0	0	0	0	0	0	0	0	0	0	0	0	0
#6_1st_invitro_cluster_212	11
			Hit Rate:	0.0804208	0.591449	0.787241	0.0804208	0.020699	0	0.0342721	0.787241	0	0	0.00610791	0.00916186	0.391585	0	0.386155	0	0	0	0	0	0	0.173057	0.19172	0	0	0.199186	0	0	0	0	0.0084832	0.00916186	0.134713	0.19172	0	0	0	0.00916186	0	0.134713	0	0.0084832	0	0	0	0
Suggested Composition
Sample_ID
#6_1st_invitro_cluster_107		DBLa0.5	CIDRa2.9	DBLb8	DBLd1	CIDRb1
#6_1st_invitro_cluster_154=cluster 90ev	NTSB3	DBLa0.12	CIDRa2.1	DBLb5	DBLg	DBLz	DBLe
#6_1st_invitro_cluster_66	NTSB	DBLa0.9	CIDRa2.1	DBLd1
#6_1st_invitro_cluster_33=cluster 19ev	NTSB3	DBLa0.1	CIDRa3.2	DBLd1	CIDRb5
#6_1st_invitro_cluster_208=cluster 137ev
#6_1st_invitro_cluster_215=cluster 142ev	NTSB	DBLa0.18	CIDRa4	DBLd1
#6_1st_invitro_cluster_222=cluster 149ev	NTSA	DBLa1
#6_1st_invitro_cluster_94=cluster 56ev
#6_1st_invitro_cluster_42= cluster 28ev	NTSB3	DBLa0.5	CIDRa2.6	DBLd1	CIDRb
#6_1st_invitro_cluster_109		DBLa0.5	CIDRa2.9	DBLb8	DBLd1	CIDRb1
#6_1st_invitro_cluster_106=cluster 77 2nd	NTSB3	DBLa0.11	CIDRa2.4	DBLd1
#6_1st_invitro_cluster_84=cluster 53ev		DBLa0.16	CIDRa3.4	DBLd1	CIDRb1
#6_1st_invitro_cluster_9=cluster 8ev	NTSB	DBLa0	CIDRa5
#6_1st_invitro_cluster_239	NTSB3	DBLa0.10	CIDRa2.2	DBLd1	CIDRb
#6_1st_invitro_cluster_194=cluster 130ev	NTSB	DBLa0.18	CIDRa6	DBLb5
#6_1st_invitro_cluster_52	NTSB3	DBLa0.11	CIDRa2.4	DBLd1
#6_1st_invitro_cluster_153 = cluster 68 ev	NTSB3	DBLa0.12	CIDRa2.1	DBLb5	DBLg	DBLz	DBLe
#6_1st_invitro_cluster_216	NTSB3	DBLa2	CIDRa1.1	DBLb3	DBLg4
#6_1st_invitro_cluster_196=cluster 131 ev	NTSB7	DBLa0.4	CIDRa3.1	DBLd1	CIDRb1
#6_1st_invitro_cluster_195	NTSB4	DBLa0.8	CIDRa5	DBLb5	DBLd1	CIDRb
#6_1st_invitro_cluster_223=cluster 150ev	NTSA7	DBLa1.2	CIDRa1.7
#6_1st_invitro_cluster_209	NTSA1	DBLa1.1	CIDRa1.2	DBLb11	DBLg1	DBLe1	DBLg1	DBLz	DBLe1	DBLg1
#6_1st_invitro_cluster_108	NTSB4	DBLa0.6	CIDRa3.1	DBLb5	DBLg5	DBLd1	CIDRb1
#6_1st_invitro_cluster_232=cluster 161 ev	NTSA	DBLa1.5	CIDRd1
#6_1st_invitro_cluster_203	NTSB	DBLa0	CIDRa5
#6_1st_invitro_cluster_212
[truncated: 177 more columns]

## Sheet: #6_2nd in vitro
	Total reads	Singletons
	1734	107
						Position D1	Position D1	Position D2	Position D2	Position D2	Position D2	Position D3	Position D3	Position D3	Position D3	Position D3	Position D4	Position D4	Position D4	Position D4	Position D4	Position D4	Position D4	Position D4	Position D5	Position D5	Position D5	Position D5	Position D5	Position D5	Position D5	Position D5	Position D6	Position D6	Position D6	Position D6	Position D6	Position D6	Position D6	Position D6	Domain 07	Domain 07	Domain 07	Domain 07	Domain 07	Domain 07	Domain 07	Domain 07	Domain 08
Sample_ID	Cluster_size	Blast_cluster_sequnece	Best Blast hit	E-value	# hits in varDB	NTSA	NTSB	DBLa0	DBLa1	DBLa2	DBLpam1	CIDRa1	CIDRa2-6	CIDRb	CIDRg	CIDRd	DBLb	DBLg	DBLd	DBLe	DBLz	CIDRb	CIDRg	CIDRd	DBLb	DBLg	DBLd	DBLe	DBLz	CIDRb	CIDRg	CIDRd	DBLb	DBLg	DBLd	DBLe	DBLz	CIDRb	CIDRg	CIDRd	DBLb	DBLg	DBLd	DBLe	DBLz	CIDRb	CIDRg	CIDRd	DBLb
#6_2nd_invitro_cluster_100=cluster 90ev	227	AGACATTGTACGAGGAAAAGATCTTTTCCTCGGTAATGATaaagaaaaagaaaaaagaaaacaattagaaaaggaattgaaagATATTTTCAAGAATATATATGACAAATTGAAGAATGGGAAGACGAATGGCGCAGAAGCACGCTACAAAGATACTGATAATTATTATGAATTAAGAGAAGATTGGTGGACAGAGAATCGAGAAACAGTATGGAAAGCATTAACATGCAAGGCTGACGATAGTAATAGATATTTTCGACCAACATGTGCTGGAGGAACAACTTCAACTCAAGGTAAATGCCGATGTCCCAATGGTAACAACCAGGTCCCCACATATTTTGACTATGTGCCGCAGTATCTTCGC	DBLa0.4	0	6	0	4	4	0	0	0	0	4	0	0	0	0	0	4	0	0	0	0	0	0	0	0	0	0	4	0	0	0	0	0	0	0	0	0	0	0	0	0	0	0	0	0	0	0
#6_2nd_invitro_cluster_76	219	GAGACATTATAAGAGGAAAAGATCTGTATCTCGGTAATCCGCAAGAAAGTGCACAAAGAGATAAATTAGAAAAGAATTTGAAAGAAATTTTCGAGAAAATACATAGTGGATTGGATGATAAAATAAAATCAAAGTATAATGGTGATACTGAAAATTATTATCAATTAAGGGAAGATTGGTGGTATGCTAATCGAGAAACAGTATGGAAAGCCATCACGTGTGAAGTTAAGAGTGGTTCTGACTATTTTCGACCAACATGTGGTGGTGATAGTGAAAGTCCATCTCAAGCTCATGACAAATGCCGATGTCCAAATGGTAAAAATGCCGACCAGGTCCCCACCTATTTCGATTATGTGCCGCAGTATCTTCGC	DBLa1.7	0	62	39	0	0	40	0	0	18	0	2	1	20	28	13	0	0	0	0	0	0	14	20	5	1	0	0	0	0	0	13	13	3	0	3	1	0	3	1	3	0	1	10	1	1	1
#6_2nd_invitro_cluster_137	113	CGATATTGTAAGAGGAAAAGATCTATATAGTGGTAATAACAAAGAAAAAGTTAAATTAGAAAAGAAATTAAAAAGAATTTTCGGGATAATATATGGAAAATTGAATGGTGTAAAAGACCACTACAAAGATGCAACTGGAGAttttttttAAATTAAGAGAAGATTGGTGGACTGCTAATAGAAACGATGTATGGAAAGCATTAACATGTAACGCTCAAGGTAATACATATTTTCGACAAACAGCGTGTGCAGGAACGCGGACTAATGACAAATGCCGATGTGACGACAAGGAAAATGTCGATCCCCCAACCTATTTCGATTATGTGCCGCAGTATCTTCGC	DBLa0.8	1.32118e-125	1	0	0	0	0	0	0	0	0	0	0	0	0	0	0	0	0	0	0	0	0	0	0	0	0	0	0	0	0	0	0	0	0	0	0	0	0	0	0	0	0	0	0	0	0
#6_2nd_invitro_cluster_148=cluster 149 ev	105	GGCGATATTATCAGAGGAAGAGATATGTTTAAATCTAATGGAAAAGTAGAAAAAGCTCTAAGAGAAGTTTTCAAGAAAATACATAGTGGTTTGAATAAAAGCAAAATTAATGATTATGATCATGATGGTACTGGAAACTACGTAAAATTAAGGGAAGATTGGTGGACGGCTAACCGCGATCAAGTATGGAAAGCATTAACATGTTCTGCACCGTATGATGCTAACTATTATCGAAAATATTCAGATAAAAGTATGGATTTTACAAGTCAAGGACAATGTGGCCACACGGAAGGAACTGTTCCTACAAATCTTGATTATGTCCCTCAATTTTTAAGA	DBLa1.7	0	62	39	0	0	40	0	0	18	0	2	1	20	28	13	0	0	0	0	0	0	14	20	5	1	0	0	0	0	0	13	13	3	0	3	1	0	3	1	3	0	1	10	1	1	1
#6_2nd_invitro_cluster_46	97	GAGATATTATAAGAGGAAAAGATCTATTTCGTGGTTATGATGATgaagaaaaaaaccgaagagaaaaattagaaaataagttgaaagaaaTTTTCAAGAATATATATAAGGACGTGATGAAGACGAGCGGGAGTAATGGGCAGAAGTCGGCGGAAGCAAAAGATCGCTACAAAGATACTAAAAATTATTATCAATTACGAGAAGATTGGTGGGACGCAAATCGCGCCAAAGTATGGTATGCTATGACGTGTGGTGCAGGACAAAATGATAAATATTTTCGACAATCATGTTCTGGTGGAAAAACTTGGACTAATGAAAAATGCCGATGCGTAAACCGTGCAGATGTTCCCACATATTTCGATTATGTGCCGCAGTTTCTTCGC	DBLa0.9	0	3	0	3	3	0	0	0	0	3	0	0	0	0	0	3	0	0	0	0	0	0	0	0	0	0	2	1	0	0	0	0	0	0	0	0	0	0	0	0	0	0	0	0	0	0
#6_2nd_invitro_cluster_142	76	GTGATATTATTCGTGGAAAAAATCTTTATCGTGGAAATAAACAAGAAAAAGATGCATTACAAGAGCAATTAAAGAAATATTTCAAGCAATTACATATTAATTTGCAACATCCAGCAAAAAGCCATTATAATGACCCAAGCGGAAATTTTTATCAACTAAGGGAAGATTGGTGGAATGCCAATAGGCAAGAAATATGGAAAGCTATTACATGCAAGGCAACTGATACTCAATATTTTAGAAATACATGTTCTGGTGGTGAAAGTCCGACAACTGTAGAATGTCACTGCATTGATGGAACTGTCCCTACAAATTTAGATTATGTCCCTCAATTTTTACGT	DBLa0.18	0	18	0	9	12	0	0	0	0	12	0	0	0	3	0	9	0	0	0	0	0	0	0	2	0	0	6	2	0	0	0	0	0	0	2	0	0	0	0	0	0	0	0	0	0	0
#6_2nd_invitro_cluster_64=cluster 56ev	70	TGATATCATACGAGGAAGAGATCTTTTCCTCGGTAATGATAAAGAAAAAGATCAAAGAAAACAATTAGATGATAATTTGAAAGATATTTTCGCGAAAATATATGACAATTTGGGTAAGAATAAGGAGGATGCAAAAGGACACTACGGAGGTGATAAAGATTTCTTTCAATTACGAGAAGACTGGTGGGATGCTAATAGAAAAGAGGTATGGAAAGCATTAACATGCGGTGCGCCAGAAGGTGCTTCATATTTTCGTGCAACATGTAGTGGAGGAAATCTAACATATAACAAATGCCGTTGTCAGAAGAAAGACGGCAAAAGTGAGACCGACCAGGTCCCCACCTATTTTGACTATGTGCCGCAGTATCTTCGC	DBLa0.5	9.16449e-83	1	0	0	0	0	0	0	0	0	0	0	0	0	0	0	0	0	0	0	0	0	0	0	0	0	0	0	0	0	0	0	0	0	0	0	0	0	0	0	0	0	0	0	0	0
#6_2nd_invitro_cluster_32	59	AGATATTGTCAGAGGAAAAGATCTATTTTATGGAAATACACaagaaaaagatcaaagaaaaaaattacaacaaaatttgaaaaaaattttcgagaaaaTACATGGTAACGTGACGAGCGACAAGAATGGGCAGGCTCTAAAAACACGCTACGAAGGTGATaaaaaaaaaTTATTTTTATCAATTAAGGGAAGATTGGTGGGACGCGAATCGGCACACCGTGTGGGAAGCCATGACATGCAGCAACAAGCTAAAAAATTCTGCATATTTTCGACCAACGTGCGATAGTAGTGATGAAAAAAATTCAACTCTTGCTAGTAACAAATGCCGATGTCCCAATGGTAACAACCAGGTCCCCACATATTTTGACTATGTGCCACAGTATCTTCGC	DBLa0.5	0	32	0	27	31	0	0	0	0	31	0	0	0	0	0	29	0	0	0	0	0	0	0	0	0	0	21	6	0	0	0	0	1	1	0	0	0	0	0	0	2	0	0	0	0	0
#6_2nd_invitro_cluster_77=cluster 106 1st	59	AGATATTGTAAGAGGAAGAGATTTGTATGGTGGTAATAAACaagaaaaagaaaaaagagatgaattagaaaagaatttacaaaaaaaTTTTTAGGAATATATATGACAAATTATTAGAGTATAACAAGACGAATGGGGAGATAGAAGCTCGCTACGGAAGTGATAAAGATCCAAATTTCTTTCAATTACGAGAAGATTGGTGGGACGCTAATAGAGAAAAAGTATGGAAAGCTATCACATGTAAAGCAAATGATGATGATAAATATTTTAGAAAAACAGCGTGTGCAGGAAAAACTCCGACTGATGATAAATGCCGGTGTAACGACGACCAGGTCCCCACCTATTTTGACTACGTCCCTCAGTATCTTCGC	DBLa0.11	0	3	0	3	3	0	0	0	0	3	0	0	0	0	0	3	0	0	0	0	0	0	0	0	0	0	2	1	0	0	0	0	0	0	0	0	0	0	0	0	0	0	0	0	0	0
#6_2nd_invitro_cluster_75	57	GTGATATCGTACGCGGTAAAGATCTTTTCCTTGGTAATACATATGAAAGTGCACAAAGAGAAAAATTAGAGAAGAATTTGAAAGATATTTTCACGCAAATATATAATGACGTGACAAATGATCAGACGAAGAAGGCGGAAGCAGAAAAACGCTACAATGATACTACAAATTATTTTCAATTAAGAGAAGACTGGTGGGCACTTAATAGAGAAACGGTATGGAAAGCCATAACATGTAGCGAGGACCTAAAAAATTCTTCATATTTTCGAGCAACATGTGGTAGTAGTGGAGAAACTCCGACTGATGATAAATGCCGATGTAGCGACAACCAAGTCCCCACATATTTTGAATACGTGCCACAGTATCTTCGC	DBLa0.5	0	1	0	0	1	0	0	0	0	1	0	0	0	1	0	0	0	0	0	0	0	0	0	1	0	0	0	0	0	0	0	0	0	0	1	0	0	0	0	0	0	0	0	0	0	0
#6_2nd_invitro_cluster_161=cluster 168ev	54	GAGACATTATACGAGGAAAAGATCTGTATCGTCGTGATAATAAAAAAGATAAATTAGAAGAGAATTTACAAAAAATTTTCAAGAAAATACATGACAAATTGGATAATAGCATAAAATCAAACTATAATGATGCTCCATATTATTATAAATTACGAGAAGATTGGTGGTATGCTAATAGAATAATGGTATGGAACGCGATAACATGCGGCGTTAAGGGTAATAAATATTTTCGACCAACATGTGTTTCAGGAGAATCGACTAAAGAGAATTGCCAATGTACTAGTTATAAGGTCCCCACATATTTCGATTATGTGCCGCAGTATCTTCGC	DBLa0.9	0	19	0	15	18	0	0	0	0	18	0	0	0	0	0	17	1	0	0	0	0	0	0	0	0	1	15	2	0	0	0	0	2	2	0	0	0	0	0	0	2	0	0	0	0	0
#6_2nd_invitro_cluster_60-cluster 94 3rd	46	AGATATTGTAAGAGGAAAAGATCTGTATCTCGGTTATGATGataaagaaaaaaaccgaagacaaaaaatagaagagaatttgaaagaaattttcgggaaaatACATAGTGAAGTGACGAGCGACAAGAATGTGGAGCTACAAAAACGCTACAAAGATATTAATGATCCAAATTTTTATAAATTACGAGAAGATTGGTGGACAGCGAATAGGCACACCGTGTGGGAAGCTATCACGTGCAAGGCGGAGCAGAATAATAAATATTTTAGAAAAACAGCGTGTGCAGGAAAAACTCCGAATCAAGGTCGATGCCGATGTGACGACATTCCAAATACCGATCCCCCAACCTATTTTGATTATGTGCCACAGTTTCTTCGC	DBLa0.16	0	2	0	0	1	0	0	0	0	1	0	0	0	0	0	1	0	0	0	0	0	0	0	0	0	0	1	0	0	0	0	0	0	0	0	0	0	0	0	0	0	0	0	0	0	0
#6_2nd_invitro_cluster_26=cluster 19ev	46	TGATATCGTACGCGGCAAAGATCTTTTCCTTGGTAATACATATGAAAGTGCACAAAGAGATAAATTAGAACAGAAATTGAAAGATATTTTCAAGGAAATACATGAGGACGTGATGAAGAACAACGGGGCGTTACAAGCTCGATACACAGATAATAAAAATTATTATCAATTACGAGAAGATTGGTGGAATGCAAATCGCTCCACAGTATGGAAAGCATTAACATGTGACCACAGGCTAGCAAGTGCTTCATATTTTCGACCAACGTGCAGTATGAATGGAAGTTGTTCTCAAGCTAATAAATACTGCCGGTGTAACGGCGACCAGCCAGGTAACGACAAGGAAAATACCGATCCCCCAACCTATTTCGATTATGTGCCGCAGTATCTTCGC	DBLa0.1	1.49458e-130	1	0	1	1	0	0	0	0	1	0	0	0	0	0	1	0	0	0	0	0	0	0	0	0	0	0	0	0	0	0	0	0	0	0	0	0	0	0	0	0	0	0	0	0	0
#6_2nd_invitro_cluster_38	45	GTGATATCGTACGCGGCAAAGATCTTTTCCTTGGTAATACATATGAAAGTGCGCAAAGAGATCAATTAGAGAAGAATTTGAAAGATATTTTCGCGAAAATACATAGTGAAGTGAGGAGAGGGAGTAATTGGCAGGCTCTAAAAACACGCTACGAAAATGATAATGAAAATTATTATCAATTACGAGAAGATTGGTGGACTGCGAATCGCGCCACAATCTGGGAAGCTATCACGTGCAACGACGACAAGAAGCTAGCAAGTGCTTCATATTTTCGAGAAACGTGCAGTGATCGTAATGGAAATAGTCAGTATCAAACTCAAAACCAATGCCGATGTAGCGACAACCAGGTCCCCACATATTTTGACTATGTTCCACAATATTTGAGA	DBLa0.5	0	1	0	0	1	0	0	0	0	1	0	0	0	1	0	0	0	0	0	0	0	0	0	1	0	0	0	0	0	0	0	0	0	0	1	0	0	0	0	0	0	0	0	0	0	0
#6_2nd_invitro_cluster_129=cluster 130ev	38	TGATATTATAAGAGGAAAGGATCTTTATCTTGGAAATAGCaaagaaaaagaaaaattagaaaaaaatttaagacaaattttcaaaaaaaTATATGACAAATTGACACATGATGCACAAACTCACTACAAAAAAGATGATAAAGGAAGTGGAAATTATTTTCAATTAAGAGAAGATTGGTGGAATGCCAATAGACAACAAGTTTGGAAAGCCATTACATGCAAAGCGGAAAATGCTCAATATTTTAGAAATACCTGTTCTATGGAAAAAAATTCTACGCAAACAAACTGTCAATGTATTGATGGAGAAGTTCCTACATATTTCGATTATGTGCCTCAATATTTACGT	DBLa0.18	0	3	0	2	2	0	0	0	0	2	0	0	0	2	0	0	0	0	0	0	0	0	1	0	0	1	0	0	0	0	0	0	1	1	0	0	0	0	0	0	1	0	0	0	0	0
#6_2nd_invitro_cluster_10=cluster 8ev	33	AGATATTGTGAGAGGAAGAGATCTTTTTATAGGTTATAATCaaaaagatagagaacaaaaacaaaaaatacaagataatttgaaagatattttcaagaaaaTACATAAGGAAGTGACGAACAGGAAGACGAATGAAGAGGCAGCAAAAGCTCGCTACGGAAATGATCCTAAAGAAAATTATTATCAATTACGAGAAGATTGGTGGGATGCGAATCGGGGCACAATCTGGAAAGCCATCACATGTGACGTTAAGGGTAATAGATATTTTCGAGCAACGTGCAATAGTGGTGATAGTCAAGGTCCATCTCAAGCTCAAAACCAATGCCGATGTCCCATGACAAGTGATGGCAAGCCCAACGACCAAGTCCCCACATATTTTGACTATGTTCCACAATATTT…	DBLa2	0	5	0	3	0	0	4	0	4	0	0	0	0	4	0	0	0	0	0	0	0	0	3	0	0	0	0	0	0	0	0	0	1	1	0	0	0	0	0	0	2	0	0	0	0	0
#6_2nd_invitro_cluster_150=cluster 150ev	32	AGATATTGTAAGAGGAAGAGATATGTTTAAATCTAATGAAATGGTAGAAATCGGTCTAAAAAAGGTTTTCAAGAAAATACATGGTAAATTAAATGGAGCTGCAATATCATATTACGATGCTGATGAAAAAGGAAATTTTTATAAATTAAGAGAAGCATGGTGGAATGTGAATAGAAATAAAGTATGGGAAGCCATAACATGTAAAGCTCCACAAAAAGCTAATTATTTTAGAAAAGGTTCAGATGGTAGTGATGTTTTTACAAGTCAAGGATATTGTGGTCGTAAGGAACTAACCGTTCCTACCTATTTAGATTACGTCCCTCAATTTTTACGT	DBLa1.2	0	93	63	0	0	66	0	0	70	0	0	0	0	2	28	0	0	11	0	0	0	1	37	1	0	0	0	0	0	0	33	1	0	0	1	0	0	1	12	17	0	0	1	0	0	0
#6_2nd_invitro_cluster_143=cluster 143ev	32	TGATATTATTCGCGGCAAAGATCTTTATATTCGTAATAAACAAGAAAAAGATAGATTAGAAGAGAATTTACAAAAAATTTTCGGGCATATATATGAAGAATTGACGAACGGCGCACAAACTTACTACAATGATGATAAAGAAAATTATTATAAATTAAGGGAAGATTGGTGGAACGCTAATAGACAACAAGTATGGAATGCTATAATATGTGGTGTAGAAAAAAACGAGAAATATTTTAAAAACACATGTTCATCTAAAGGTGGGCATTATGAAAAATGCCGATGTATTAATGGCGACGTTCTTACGAATTTCGATTATGTTCCGCAGTATCTTCGC	DBLa2	0	5	0	3	0	0	4	0	4	0	0	0	0	4	0	0	0	0	0	0	0	0	3	0	0	0	0	0	0	0	0	0	1	1	0	0	0	0	0	0	2	0	0	0	0	0
#6_2nd_invitro_cluster_131=cluster 131 ev	31	CGATATTGTAAGAGGAAAAGATCTTTTTCTTGGTCATAGCAAAGAAAAAGAAAAATTAGAACAAAATTTGAAAAATCTTTTCAAGCAATTATATGAAGAATTAAAGAAGCATGATACCACGATaaaaaaaaCTTACGAAAAATACGGTCCAGATTTTTATCAATTACGAGAAGATTGGTGGAATAATAATAGAATAATGGTATGGTATGCTATAACGTGTGGTGCAACAGATGGTGATAAATATTTTAGAGAATCATCTTCTGATAAAGGTGGCACTTATGAAAAATGCCGATGTTCTAGTCATAAGGTCCCCACATATTTTGACTATGTGCCGCAGTATCTTCGC	DBLa0.4	0	6	0	4	4	0	0	0	0	4	0	0	0	0	0	4	0	0	0	0	0	0	0	0	0	0	4	0	0	0	0	0	0	0	0	0	0	0	0	0	0	0	0	0	0	0
#6_2nd_invitro_cluster_138=cluster 209 1st	28	TGATATTGTAAGAGGAATAGATATGTTTAAACCAAATGTCCATGACAAAGTAGAAAAGGGTCTCCGAGAGGTTTTCAAGAAAATACATGATGAAATGGAAGGTGAGGTAAAAAATTATTACAATCCTGATGGATCTGGAAATTATTATAAATTAAGAGAAGCATGGTGGGATGTGAATAGAAATAAAGTATGGGAAGCCATAACCTGTGGCGCACTACCTAAATCTGCATATTTCTTGCAATCAGAAGATAATAAACAATTATTTTTATATCCTAAATGCGGCCATAATAATAAGAATGATCTTCCTACCAATTTAGATTATGTTCCTCAATATTTACGT	DBLa1.1	0	200	149	0	0	157	0	0	155	2	0	0	0	155	0	0	0	0	0	0	0	0	145	0	0	0	0	0	0	0	0	0	129	0	0	0	0	0	112	0	0	0	0	0	0	0
#6_2nd_invitro_cluster_106=cluster 101ev	26	TGATATCGTACGCGGCAAAGATCTTTTTATAGGTTATAATGaaaaagatcaagaagaaaaaagaaaattacaagagaacttgagaaaaaTTTTCAAGGAAATATATAATAAATTGGGGGATACTGGAGCACAAGAACGCTACGAAGGTGATGAAGCCAATGATTTTTTTAAATTACGAGAAGATTGGTGGGATGCTAATAGACTAGAAGTATGGAAAGCTATCACTTGTGGTGCAGGAGAAAGTGATAAATATTTTAGAAAAACATGTTCTTCCGGAAATTCTAAGACGAGTGGACATTGTAAGTGTATTGATGGAACAGTTCCTACCAACTTGGATTATGTTCCTCAATATTTGAGA	DBLa0.12	0	4	0	3	3	0	0	0	0	3	0	0	0	3	0	0	0	0	0	0	0	0	3	0	0	0	0	0	0	0	0	0	0	3	0	0	0	0	0	0	2	0	0	0	0	0
#6_2nd_invitro_cluster_130=cluster 195 1st	13	TGATATTATTCGAGGAAAAGATCTATTTCTTGGTAATAATAaagaaaaaaagcaattagaagagaatttaaaaaaaattttcaaagaaaTATATGACAATTTGAAGAATACTGATGTACAAGAACACTACAAAGATGATGATAAAGTAACTAAAAATTATTATAAATTAAGGAATGATTGGTGGGAAGCTAATAGACAAGAAGTATGGAAAGCTATCACATGTGGCGCTGCGGGTGGTACATATTTTAGAAATACATGTGTTGGGGGAAATGAAACTGAAAGTAACTGCCGATGTAAGACAAATTATGTTACTACATATTTTGACTACGTGCCGCAGTATCTTCGC	DBLa0.8	0	5	0	2	4	0	0	0	0	4	0	0	0	3	0	1	0	0	0	0	0	0	0	2	0	0	0	1	0	0	0	0	0	0	2	0	0	0	0	0	0	0	0	0	0	0
					# hits in varDB	NTSA	NTSB	DBLa0	DBLa1	DBLa2	DBLpam1	CIDRa1	CIDRa2-6	CIDRb	CIDRg	CIDRd	DBLb	DBLg	DBLd	DBLe	DBLz	CIDRb	CIDRg	CIDRd	DBLb	DBLg	DBLd	DBLe	DBLz	CIDRb	CIDRg	CIDRd	DBLb	DBLg	DBLd	DBLe	DBLz	CIDRb	CIDRg	CIDRd	DBLb	DBLg	DBLd	DBLe	DBLz	CIDRb	CIDRg	CIDRd	DBLb
				Sample_total:	527	290	75	84	303	8	0	269	86	4	2	40	234	54	68	1	11	0	0	0	29	232	17	2	2	51	13	0	0	59	27	141	9	13	2	0	7	126	23	11	2	21	2	2	2
Interpreded Results				Position D1	Position D1	Position D2	Position D2	Position D2	Position D2	Position D3	Position D3	Position D3	Position D3	Position D3	Position D3	Position D4	Position D4	Position D4	Position D4	Position D4	Position D4	Position D4	Position D4	Position D5	Position D5	Position D5	Position D5	Position D5	Position D5	Position D5	Position D5	Position D6	Position D6	Position D6	Position D6	Position D6	Position D6	Position D6	Position D6	Domain 07	Domain 07	Domain 07	Domain 07	Domain 07	Domain 07	Domain 07	Domain 07	Domain 08	Domain 08
Sample_ID	Cluster_size			NTSA	NTSB	DBLa0	DBLa1	DBLa2	DBLpam1	CIDRa1	CIDRa2-6	CIDRb	CIDRg	CIDRd	CIDRa1.2-3	DBLb	DBLg	DBLd	DBLe	DBLz	CIDRb	CIDRg	CIDRd	DBLb	DBLg	DBLd	DBLe	DBLz	CIDRb	CIDRg	CIDRd	DBLb	DBLg	DBLd	DBLe	DBLz	CIDRb	CIDRg	CIDRd	DBLb	DBLg	DBLd	DBLe	DBLz	CIDRb	CIDRg	CIDRd	DBLb	DBLg
#6_2nd_invitro_cluster_100=cluster 90ev	219			1	0	0	1	0	0	0		0	0	0		0	0	0	0	0	0	0	0	0	0	0	0	0	0	0	0	0	0	0	0	0	0	0	0	0	0	0	0	0	0	0	0	0	0
#6_2nd_invitro_cluster_76	197			0	1	1	0	0	0	0	1	0	0	0		0	0	1	0	0	0	0	0	0	0	0	0	0	1	0	0	0	0	0	0	0	0	0	0	0	0	0	0	0	0	0	0	0	0
#6_2nd_invitro_cluster_137	113
#6_2nd_invitro_cluster_148=cluster 149 ev	105			1	0	0	1	0	0	0		0	0	0		0	0	0	0	0	0	0	0	0	0	0	0	0	0	0	0	0	0	0	0	0	0	0	0	0	0	0	0	0	0	0	0	0	0
#6_2nd_invitro_cluster_46	97			0	1	1	0	0	0	0	1	0	0	0		0	0	1	0	0	0	0	0	0	0	0	0	0	0	0	0	0	0	0	0	0	0	0	0	0	0	0	0	0	0	0	0	0	0
#6_2nd_invitro_cluster_142	76			0	1	1	0	0	0	0	1	0	0	0		0	0	1	0	0	0	0	0	0	0	0	0	0	0	0	0	0	0	0	0	0	0	0	0	0	0	0	0	0	0	0	0	0	0
#6_2nd_invitro_cluster_64=cluster 56ev	70
#6_2nd_invitro_cluster_32	59			0	1	1	0	0	0	0	1	0	0	0		0	0	1	0	0	0	0	0	0	0	0	0	0	1	0	0	0	0	0	0	0	0	0	0	0	0	0	0	0	0	0	0	0	0
#6_2nd_invitro_cluster_77=cluster 106 1st	59			0	1	1	0	0	0	0	1	0	0	0		0	0	1	0	0	0	0	0	0	0	0	0	0	0	0	0	0	0	0	0	0	0	0	0	0	0	0	0	0	0	0	0	0	0
#6_2nd_invitro_cluster_75	57			0	0	1	0	0	0	0	1	0	0	0		1	0	0	0	0	0	0	0	0	0	1	0	0	0	0	0	0	0	0	0	0	1	0	0	0	0	0	0	0	0	0	0
#6_2nd_invitro_cluster_161=cluster 168ev	54			0	1	1	0	0	0	0	1	0	0	0		0	0	1	0	0	0	0	0	0	0	0	0	0	1	0	0	0	0	0	0	0	0	0	0	0	0	0	0	0	0	0	0	0	0
#6_2nd_invitro_cluster_60-cluster 94 3rd	46			0	0	1	0	0	0	0	1	0	0	0		0	0	1	0	0	0	0	0	0	0	0	0	0	1	0	0	0	0	0	0	0	0	0	0
#6_2nd_invitro_cluster_26=cluster 19ev	46			0	1	1	0	0	0	0	1	0	0	0		0	0	1	0	0	0	0	0	0	0	0	0	0	0	0	0	0	0	0	0	0	0	0	0	0	0	0	0	0	0	0	0	0	0
#6_2nd_invitro_cluster_38	45			0	0	1	0	0	0	0	1	0	0	0		1	0	0	0	0	0	0	0	0	0	1	0	0	0	0	0	0	0	0	0	0	1	0	0	0	0	0	0	0	0	0	0
#6_2nd_invitro_cluster_129=cluster 130ev	38			0	1	1	0	0	0	0	1	0	0	0		1	0	0	0	0	0	0	0	0	0	0	0	0	0	0	0	0	0	0	0	0	0	0	0	0	0	0	0	0	0	0	0	0	0
#6_2nd_invitro_cluster_10=cluster 8ev	33			0	1	0	0	1	0	1		0	0	0		1	0	0	0	0	0	0	0	0	1	0	0	0	0	0	0	0	0	0	0	0	0	0	0	0	0	0	0	0	0	0	0	0	0
#6_2nd_invitro_cluster_150=cluster 150ev	32			1	0	0	1	0	0	1		0	0	0		0	0	0	0	0	0	0	0	0	0	0	0	0	0	0	0	0	0	0	0	0	0	0	0	0	0	0	0	0	0	0	0	0	0
#6_2nd_invitro_cluster_143=cluster 143ev	32			0	1	0	0	1	0	1		0	0	0		1	0	0	0	0	0	0	0	0	1	0	0	0	0	0	0	0	0	0	0	0	0	0	0	0	0	0	0	0	0	0	0	0	0
#6_2nd_invitro_cluster_131=cluster 131 ev	31			0	1	1	0	0	0	0	1	0	0	0		0	0	1	0	0	0	0	0	0	0	0	0	0	1	0	0	0	0	0	0	0	0	0	0	0	0	0	0	0	0	0	0	0	0
#6_2nd_invitro_cluster_138=cluster 209 1st	28			1	0	0	1	0	0	0		0	0	0	1	1	0	0	0	0	0	0	0	0	1	0	0	0	0	0	0	0	0	0	1	0	0	0	0	0	1	0	0	0	0	0	0	0	0
#6_2nd_invitro_cluster_106=cluster 101ev	26			0	1	1	0	0	0	0	1	0	0	0		1	0	0	0	0	0	0	0	0	1	0	0	0	0	0	0	0	0	0	0	1	0	0	0	0	0	0	1	0	0	0	0	0	0
#6_2nd_invitro_cluster_130=cluster 195 1st	13			0	1	1	0	0	0	0	1	0	0	0		1	0	0	0	0	0	0	0	0	0	0	0	0	0	0	0	0	0	0	0	0	0	0	0	0	0	0	0	0	0	0	0	0	0
			Hit Rate:	0.260163	0.515583	0.571816	0.260163	0.0440379	0	0.0657182	0.571816	0	0	0	0.0189702	0.184282	0	0.450542	0	0	0	0	0	0	0.0806233	0.0691057	0	0	0.262195	0	0	0	0	0	0.0189702	0.0176152	0.0691057	0	0	0	0.0189702	0	0.0176152	0	0	0	0	0	0
Suggested Composition
Sample_ID
#6_2nd_invitro_cluster_100=cluster 90ev	NTSA	DBLa1
#6_2nd_invitro_cluster_76	NTSB7	DBLa0.4	CIDRa3.1	DBLd1	CIDRb1
#6_2nd_invitro_cluster_137
#6_2nd_invitro_cluster_148=cluster 149 ev	NTSA	DBLa1
#6_2nd_invitro_cluster_46	NTSB	DBLa0.9	CIDRa2.1	DBLd1
#6_2nd_invitro_cluster_142	NTSB	DBLa0.18	CIDRa4	DBLd1
#6_2nd_invitro_cluster_64=cluster 56ev
#6_2nd_invitro_cluster_32	NTSB3	DBLa0.5	CIDRa2.6	DBLd1	CIDRb
#6_2nd_invitro_cluster_77=cluster 106 1st	NTSB3	DBLa0.11	CIDRa2.4	DBLd1
#6_2nd_invitro_cluster_75		DBLa0.5	CIDRa2.9	DBLb8	DBLd1	CIDRb1
#6_2nd_invitro_cluster_161=cluster 168ev	NTSB3	DBLa0.10	CIDRa2.2	DBLd1	CIDRb
#6_2nd_invitro_cluster_60-cluster 94 3rd		DBLa0.16	CIDRa3.4	DBLd1	CIDRb1
#6_2nd_invitro_cluster_26=cluster 19ev	NTSB3	DBLa0.1	CIDRa3.2	DBLd1
#6_2nd_invitro_cluster_38		DBLa0.5	CIDRa2.9	DBLb8	DBLd1	CIDRb1
#6_2nd_invitro_cluster_129=cluster 130ev	NTSB	DBLa0.18	CIDRa6	DBLb5
#6_2nd_invitro_cluster_10=cluster 8ev	NTSB3	DBLa2	CIDRa1.1	DBLb3	DBLg4
#6_2nd_invitro_cluster_150=cluster 150ev	NTSA7	DBLa1.2	CIDRa1.7
#6_2nd_invitro_cluster_143=cluster 143ev	NTSB3	DBLa2	CIDRa1.1	DBLb3	DBLg4
#6_2nd_invitro_cluster_131=cluster 131 ev	NTSB7	DBLa0.4	CIDRa3.1	DBLd1	CIDRb1
#6_2nd_invitro_cluster_138=cluster 209 1st	NTSA1	DBLa1.1	CIDRa1.2	DBLb11	DBLg1	DBLe1	DBLg1	DBLz	DBLe1	DBLg1
#6_2nd_invitro_cluster_106=cluster 101ev	NTSB3	DBLa0.12	CIDRa2.1	DBLb5	DBLg	DBLz	DBLe
#6_2nd_invitro_cluster_130=cluster 195 1st	NTSB4	DBLa0.8	CIDRa5	DBLb5
[truncated: 177 more columns]

## Sheet: #6_3rd in vitro
	Total reads	Singletons
	2995	174
						Position D1	Position D1	Position D2	Position D2	Position D2	Position D2	Position D3	Position D3	Position D3	Position D3	Position D3	Position D4	Position D4	Position D4	Position D4	Position D4	Position D4	Position D4	Position D4	Position D5	Position D5	Position D5	Position D5	Position D5	Position D5	Position D5	Position D5	Position D6	Position D6	Position D6	Position D6	Position D6	Position D6	Position D6	Position D6	Domain 07	Domain 07	Domain 07	Domain 07	Domain 07	Domain 07	Domain 07	Domain 07	Domain 08
Sample_ID	Cluster_size	Blast_cluster_sequnece	Best Blast hit	E-value	# hits in varDB	NTSA	NTSB	DBLa0	DBLa1	DBLa2	DBLpam1	CIDRa1	CIDRa2-6	CIDRb	CIDRg	CIDRd	DBLb	DBLg	DBLd	DBLe	DBLz	CIDRb	CIDRg	CIDRd	DBLb	DBLg	DBLd	DBLe	DBLz	CIDRb	CIDRg	CIDRd	DBLb	DBLg	DBLd	DBLe	DBLz	CIDRb	CIDRg	CIDRd	DBLb	DBLg	DBLd	DBLe	DBLz	CIDRb	CIDRg	CIDRd	DBLb
#6_3rd_invitro_cluster_86=cluster 76 2nd	336	AGACATTATAAGAGGAAAAGATCTGTATCTCGGTAATCCGCAAGAAAGTGCACAAAGAGATAAATTAGAAAAGAATTTGAAAGAAATTTTCGAGAAAATACATAGTGGATTGGATGATAAAATAAAATCAAAGTATAATGGTGATACTGAAAATTATTATCAATTAAGGGAAGATTGGTGGTATGCTAATCGAGAAACAGTATGGAAAGCCATCACGTGTGAAGTTAAGAGTGGTTCTGACTATTTTCGACCAACATGTGGTGGTGATAGTGAAAGTCCATCTCAAGCTCATGACAAATGCCGATGTCCCAATGGTAAAAATGCCGACCAGGTTCCCACCTATTTCGATTATGTGCCACAATATTTGAGATGGTTCGAC	DBLa0.9	0	3	0	3	3	0	0	0	0	3	0	0	0	0	0	3	0	0	0	0	0	0	0	0	0	0	2	1	0	0	0	0	0	0	0	0	0	0	0	0	0	0	0	0	0	0
#6_3rd_invitro_cluster_167=cluster 90 ev	263	AGACATTGTACGAGGAAAAGATCTTTTCCTCGGTAATGATaaagaaaaagaaaaaagaaaacaattagaaaaggaattgaaagATATTTTCAAGAATATATATGACAAATTGAAGAATGGGAAGACGAATGGCGCAGAAGCACGCTACAAAGATACTGATAATTATTATGAATTAAGAGAAGATTGGTGGACAGAGAATCGAGAAACAGTATGGAAAGCATTAACATGCAAGGCTGACGATAGTAATAGATATTTTCGACCAACATGTGCTGGAGGAACAACTTCAACTCAAGGTAAATGCCGATGTCCCAATGGTAACAACCAGGTCCCCACATATTTTGACTATGTGCCACAGTATCTTCGC	DBLa0.16	0	2	0	0	1	0	0	0	0	1	0	0	0	0	0	1	0	0	0	0	0	0	0	0	0	0	1	0	0	0	0	0	0	0	0	0	0	0	0	0	0	0	0	0	0	0
#6_3rd_invitro_cluster_249=cluster 149 ev	245	GCGATATTATCAGAGGAAGAGATATGTTTAAATCTAATGGAAAAGTAGAAAAAGCTCTAAGAGAAGTTTTCAAGAAAATACATAGTGGTTTGAATAAAAGCAAAATTAATGATTATGATCATGATGGTACTGGAAACTACGTAAAATTAAGGGAAGATTGGTGGACGGCTAACCGCGATCAAGTATGGAAAGCATTAACATGTTCTGCACCGTATGATGCTAACTATTATCGAAAATATTCAGATAAAAGTATGGATTTTACAAGTCAAGGACAATGTGGCCACACGGAAGGAACTGTTCCTACAAATCTTGATTATGTCCCTCAATTTTTAAGA	DBLa1.7	0	60	37	0	0	38	0	0	18	0	2	1	18	28	11	0	0	0	0	0	0	12	20	5	1	0	0	0	0	0	13	11	3	0	3	1	0	3	1	3	0	1	8	1	1	1
#6_3rd_invitro_cluster_234=cluster 137 2nd	198	CGATATTGTAAGAGGAAAAGATCTATATAGTGGTAATAACAAAGAAAAAGTTAAATTAGAAAAGAAATTAAAAAGAATTTTCGGGATAATATATGGAAAATTGAATGGTGTAAAAGACCACTACAAAGATGCAACTGGAGAttttttttAAATTAAGAGAAGATTGGTGGACTGCTAATAGAAACGATGTATGGAAAGCATTAACATGTAACGCTCAAGGTAATACATATTTTCGACAAACAGCGTGTGCAGGAACGCGGACTAATGACAAATGCCGATGTGACGACAAGGCAAATGTCGATCCCCCAACCTATTTCGATTATGTGCCGAAGTATCTTCGC	DBLa0.8	2.85985e-122	1	0	0	0	0	0	0	0	0	0	0	0	0	0	0	0	0	0	0	0	0	0	0	0	0	0	0	0	0	0	0	0	0	0	0	0	0	0	0	0	0	0	0	0	0
#6_3rd_invitro_cluster_241=cluster 142ev	141	GTGATATTATTCGTGGAAAAGATCTTTATCGTGGAAATAAACAAGAAAAAGATGCATTACAAGAGCAATTAAAGAAATATTTCAAGCAATTACATATTAATTTGCAACATCCAGCAAAAAGCCATTATAATGACCCAAGCGGAAATTTTTATCAACTAAGGGAAGATTGGTGGAATGCCAATAGGCAAGAAATATGGAAAGCTATTACATGCAAGGCAACTGATACTCAATATTTTAGAAATACATGTTCTGGTGGTGAAAGTCCGACAACTGTAGAATGTCACTGCATTGATGGAACTGTCCCTACAAATTTAGATTATGTCCCTCAATTTTTACGT	DBLa0.18	0	18	0	9	12	0	0	0	0	12	0	0	0	3	0	9	0	0	0	0	0	0	0	2	0	0	6	2	0	0	0	0	0	0	2	0	0	0	0	0	0	0	0	0	0	0
#6_3rd_invitro_cluster_75=cluster 46 2nd	122	GAGATATTATAAGAGGAAAAGATCTATTTCGTGGTTATGATGATgaagaaaaaaaccgaagagaaaaattagaaaataagttgaaagaaaTTTTCAAGAATATATATAAGGACGTGATGAAGACGAGCGGGAGTAATGGGCAGAAGTCGGCGGAAGCAAAAGATCGCTACAAAGATACTAAAAATTATTATCAATTACGAGAAGATTGGTGGGACGCAAATCGCGCCAAAGTATGGTATGCTATGACGTGTGGTGCAGGACAAAATGATAAATATTTTCGACAATCATGTTCTGGTGGAAAAACTTGGACTAATGAAAAATGCCGATGCGTAAACCGTGCAGATGTTCCCACATATTTCGATTATGTGCCGCAGTTTCTTCGC	DBLa0.9	0	3	0	3	3	0	0	0	0	3	0	0	0	0	0	3	0	0	0	0	0	0	0	0	0	0	2	1	0	0	0	0	0	0	0	0	0	0	0	0	0	0	0	0	0	0
#6_3rd_invitro_cluster_127=cluster 68 ev	112	AGATATTGTAAGAGGAAGAGATTTGTATGGTGGTAATAAACaagaaaaagaaaaaaagagatgaattagagaagaatttacaaaaaaTTTTTAGGAATATATATGACAAATTATTAGAGTATAACAAGACGAATGGGGAGATAGAAGCTCGCTACGGAAGTGATAAAGATCCAAATTTCTTTCAATTACGAGAAGATTGGTGGGACGCTAATAGAGAAAAAGTATGGAAAGCTATCACATGTAAAGCAAATGATGATGATAAATATTTTAGAAAAACAGCGTGTGCAGGAAAAACTCCGACTGATGATAAATGCCGGTGTAACGACGACCAGGTCCCCACCTATTTTGACTACGTCCCTCAGTATCTTCGC	DBLa0.11	0	3	0	3	3	0	0	0	0	3	0	0	0	0	0	3	0	0	0	0	0	0	0	0	0	0	2	1	0	0	0	0	0	0	0	0	0	0	0	0	0	0	0	0	0	0
#6_3rd_invitro_cluster_268=cluster 168 ev	107	GAGACATTATACGAGGAAAAGATCTGTATCGTCGTGATAATAAAAAAGATAAATTAGAAGAGAATTTACAAAAAATTTTCAAGAAAATACATGACAAATTGGATAATAGCATAAAATCAAACTATAATGATGCTCCATATTATTATAAATTACGAGAAGATTGGTGGTATGCTAATAGAATAATGGTATGGAACGCGATAACATGCGGCGTTAAGGGTAATAAATATTTTCGACCAACATGTGTTTCAGGAGAATCGACTAAAGAGAATTGCCAATGTACTAGTTATAAGGTCCCCACATATTTTGACTATGTGCCACAGTATCTTCGC	DBLa0.9	0	19	0	15	18	0	0	0	0	18	0	0	0	0	0	17	1	0	0	0	0	0	0	0	0	1	15	2	0	0	0	0	2	2	0	0	0	0	0	0	2	0	0	0	0	0
#6_3rd_invitro_cluster_50	93	GAGATATTGTCAGAGGAAAAGATCTATTTTATGGAAATACAcaagaaaaagatcaaagaaaaaaattacaacaaaatttgaaaaaaatttttcgagaaaaTACATGGTAACGTGACGAGCGACAAGAATGGGCAGGCTCTAAAAACACGCTACGAAGGTGATaaaaaaaaTTATTTTTATCAATTAAGGGAAGATTGGTGGGACGCGAATCGGCACACCGTGTGGGAAGCCATGACATGCAGCGACAAGCTAAAAAATTCTGCATATTTTCGACCAACGTGCGATAGTAGTGATGAAAAAAATTCAACTCTTGCTAGTAACAAATGCCGATGTCCCAATGGTAACAACCAGGTCCCCACATATTTTGACTATGTGCCACAGTATCTTCGC	DBLa0.5	0	35	0	29	33	0	0	0	0	33	0	0	0	0	0	31	0	0	0	0	0	0	0	0	0	0	22	7	0	0	0	0	1	1	0	0	0	0	0	0	2	0	0	0	0	0
#6_3rd_invitro_cluster_111=cluster 56 ev	85	TGATATCATACGAGGAAGAGATCTTTTCCTCGGTAATGATAAAGAAAAAGATCAAAGAAAACAATTAGATGATAATTTGAAAGATATTTTCGCGAAAATATATGACAATTTGGGTAAGAATAAGGAGGATGCAAAAGGACACTACGGAGGTGATAAAGATTTCTTTCAATTACGAGAAGACTGGTGGGATGCTAATAGAAAAGAGGTATGGAAAGCATTAACATGCGGTGCGCCAGAAGGTGCTTCATATTTTCGTGCAACATGTAGTGGAGGAAATCTAACATATAACAAATGCCGTTGTCAGAAGAAAGACGGCAAAAGTGAGACCGACCAGGTCCCCACCTATTTTGACTATGTGCCACAGTATCTTCGCT	DBLa0.5	5.52971e-80	1	0	0	0	0	0	0	0	0	0	0	0	0	0	0	0	0	0	0	0	0	0	0	0	0	0	0	0	0	0	0	0	0	0	0	0	0	0	0	0	0	0	0	0	0
#6_3rd_invitro_cluster_39=cluster 19 ev	85	GTGATATCGTACGCGGCAAAGATCTTTTCCTTGGTAATACATATGAAAGTGCACAAAGAGATAAATTAGAACAGAAATTGAAAGATATTTTCAAGGAAATACATGAGGACGTGATGAAGAACAACGGGGCGTTACAAGCTCGATACACAGATAATAAAAATTATTATCAATTACGAGAAGATTGGTGGAATGCAAATCGCTCCACAGTATGGAAAGCATTAACATGTGACCACAGGCTAGCAAGTGCTTCATATTTTCGACCAACGTGCAGTATGAATGGAAGTTGTTCTCAAGCTAATAAATACTGCCGGTGTAACGGCGACCAGCCAGGTAACGACAAGGAAAATACCGATCCCCCAACCTATTTTGACTATGTACCGCAGTATCTTCGC	DBLa0.1	3.19754e-137	4	0	3	3	0	0	0	0	3	0	0	0	0	0	2	0	0	0	0	0	0	0	0	0	0	1	0	0	0	0	0	0	0	0	0	0	0	0	0	0	0	0	0	0	0
#6_3rd_invitro_cluster_94=cluster 60 2nd	84	AGATATTGTAAGAGGAAAAGATCTGTATCTCGGTTATGATGataaagaaaaaaaccgaagacaaaaaatagaagagaatttgaaagaaattttcgggaaaatACATAGTGAAGTGACGAGCGACAAGAATGTGGAGCTACAAAAACGCTACAAAGATATTAATGATCCAAATTTTTATAAATTACGAGAAGATTGGTGGACAGCGAATAGGCACACCGTGTGGGAAGCTATCACGTGCAAGGCGGAGCAGAATAATAAATATTTTAGAAAAACAGCGTGTGCAGGAAAAACTCCGAATCAAGGTCGATGCCGATGTGACGACATTCCAAATACCGATCCCCCAACCTATTTTGATTATGTGCCACAGTTTCTTCGCT	DBLa0.16	0	2	0	0	1	0	0	0	0	1	0	0	0	0	0	1	0	0	0	0	0	0	0	0	0	0	1	0	0	0	0	0	0	0	0	0	0	0	0	0	0	0	0	0	0	0
#6_3rd_invitro_cluster_62=cluster 52 1st	75	TGATATCGTACGCGGCAAAGATCTTTTCCTTGGTAATACATATGAAAGTGCACAAAGAGATCAATTAGAGAAGAATTTGAAAGATATTTTCGCGAAAATACATAGTGAAGTGAGGAGAGGGAGTAATTGGCAGGCTCTAAAAACACGCTACGAAAATGATAATGAAAATTATTATCAATTACGAGAAGATTGGTGGACTGCGAATCGCGCCACAATCTGGGAAGCTATCACGTGCAACGACGACAAGAAGCTAGCAAGTGCTTCATATTTTCGAGAAACGTGCAGTGATCGTAATGGAAATAGTCAGTATCAAACTCAAAACCAATGCCGATGTAGCGACAACCAGGTCCCCACATATTTTGACTATGTGCCACAGTATCTTCGC	DBLa0.16	0	2	0	1	1	0	0	0	0	1	0	0	0	0	0	1	0	0	0	0	0	0	0	0	0	0	1	0	0	0	0	0	0	0	0	0	0	0	0	0	0	0	0	0	0	0
#6_3rd_invitro_cluster_216=cluster 130 ev	72	GTGATATTATAAGAGGAAAGGATCTTTATCTTGGAAATAGCaaagaaaaagaaaaattagaaaaaaatttaagacaaattttcaaaaaaaTATATGACAAATTGACACATGATGCACAAACTCACTACAAAAAAGATGATAAAGGAAGTGGAAATTATTTTCAATTAAGAGAAGATTGGTGGAATGCCAATAGACAACAAGTTTGGAAAGCCATTACATGCAAAGCGGAAAATGCTCAATATTTTAGAAATACCTGTTCTATGGAAAAAAATTCTACGCAAACAAACTGTCAATGTATTGATGGAGAAGTTCCTACATATTTCGATTATGTGCCTCAATATTTACGT	DBLa0.18	0	3	0	2	2	0	0	0	0	2	0	0	0	2	0	0	0	0	0	0	0	0	1	0	0	1	0	0	0	0	0	0	1	1	0	0	0	0	0	0	1	0	0	0	0	0
#6_3rd_invitro_cluster_8=cluster 8ev	68	GAGATATTGTGAGAGGAAGAGATCTTTTTATAGGTTATAATcaaaaagatagagaacaaaaacaaaaaatacaagataatttgaaagatattttcaagaaaaTACATAAGGAAGTGACGAACAGGAAGACGAATGAAGAGGCAGCAAAAGCTCGCTACGGAAATGATCCTAAAGAAAATTATTATCAATTACGAGAAGATTGGTGGGATGCGAATCGGGGCACAATCTGGAAAGCCATCACATGTGACGTTAAGGGTAATAGATATTTTCGAGCAACGTGCAATAGTGGTGATAGTCAAGGTCCATCTCAAGCTCAAAACCAATGCCGATGTCCCATGACAAGTGATGGCAAGCCCAACGACCAAGTCCCCACATATTTTGACTATGTTCCACAATATT…	DBLa0.11	0	3	0	3	3	0	0	0	0	3	0	0	0	0	0	3	0	0	0	0	0	0	0	0	0	0	2	1	0	0	0	0	0	0	0	0	0	0	0	0	0	0	0	0	0	0
#6_3rd_invitro_cluster_235=cluster 138 ev	64	TGATATTGTAAGAGGAATAGATATGTTTAAACCAAATGTCCATGACAAAGTAGAAAAGGGTCTCCGAGAGGTTTTCAAGAAAATACATGATGAAATGGAAGGTGAGGTAAAAAAATTATTACAATCCTGATGGATCTGGAAATTATTATAAATTAAGAGAAGCATGGTGGGATGTGAATAGAAATAAAGTATGGGAAGCCATAACCTGTGGCGCACTACCTAAATCTGCATATTTCTTGCAATCAGAAGATAATAAACAATTATTTTTATATCCTAAATGCGGCCATAATAATAAGAATGATCTTCCTACCAATTTAGATTATGTTCCTCAATATTTACGT	DBLa1.1	0	200	149	0	0	157	0	0	155	2	0	0	0	155	0	0	0	0	0	0	0	0	145	0	0	0	0	0	0	0	0	0	129	0	0	0	0	0	112	0	0	0	0	0	0	0
#6_3rd_invitro_cluster_104	57	TGATATCGTACGCGGTAAAGATCTTTTCCTTGGTAATACATATGAAAGTGCACAAAGAGAAAAATTAGAGAAGAATTTGAAAGATATTTTCACGCAAATATATAATGACGTGACAAATGATCAGACGAAGAAGGCGGAAGCAGAAAAACGCTACAATGATACTACAAATTATTTTCAATTAAGAGAAGACTGGTGGGCACTTAATAGAGAAACGGTATGGAAAGCCATAACATGTAGCGAGGACCTAAAAAATTCTTCATATTTTCGAGCAACATGTGGTAGTAGTGGAGAAACTCCGACTGATGATAAATGCCGATGTCCCAATGGTAACAACCAGGTCCCCACATATTTTGACTATGTGCCACAGTATCTTCGC	DBLa0.5	0	1	0	0	1	0	0	0	0	1	0	0	0	1	0	0	0	0	0	0	0	0	0	1	0	0	0	0	0	0	0	0	0	0	1	0	0	0	0	0	0	0	0	0	0	0
#6_3rd_invitro_cluster_240=cluster 143 ev	49	TGATATTATTCGCGGCAAAGATCTTTATATTCGTAATAAACAAGAAAAAGATAGATTAGAAGAGAATTTACAAAAAATTTTCGGGCATATATATGAAGAATTGACGAACGGCGCACAAACTTACTACAATGATGATAAAGAAAATTATTATAAATTAAGGGAAGATTGGTGGAACGCTAATAGACAACAAGTATGGAATGCTATAATATGTGGTGTAGAAAAAAACGAGAAATATTTTAAAAACACATGTTCATCTAAAGGTGGGCATTATGAAAAATGCCGATGTATTAATGGCGACGTTCTTACGAATTTCGATTATGTTCCGCAGTATCTTCGCT	DBLa2	4.35931e-180	5	0	3	0	0	4	0	4	0	0	0	0	4	0	0	0	0	0	0	0	0	3	0	0	0	0	0	0	0	0	0	1	1	0	0	0	0	0	0	2	0	0	0	0	0
#6_3rd_invitro_cluster_252=cluster 150 ev	46	AGATATTGTAAGAGGAAGAGATATGTTTAAATCTAATGAAATGGTAGAAATCGGTCTAAAAAAGGTTTTCAAGAAAATACATGGTAAATTAAATGGAGCTGCAATATCATATTACGATGCTGATGAAAAAGGAAATTTTTATAAATTAAGAGAAGCATGGTGGAATGTGAATAGAAATAAAGTATGGGAAGCCATAACATGTAAAGCTCCACAAAAAGCTAATTATTTTAGAAAAGGTTCAGATGGTAGTGATGTTTTTACAAGTCAAGGATATTGTGGTCGTAAGGAACTAACCGTTCCTACCTATTTAGATTACGTCCCTCAATTTTTACGT	DBLa1.2	0	99	68	0	0	71	0	0	75	0	0	0	0	4	29	0	0	12	0	0	0	1	41	1	0	0	0	0	0	0	36	1	1	0	1	0	0	1	15	18	0	0	1	0	0	0
#6_3rd_invitro_cluster_215=cluster 131 ev	44	GCGATATTGTAAGAGGAAAAGATCTTTTTCTTGGTCATAGCaaagaaaaagaaaaattagaacaaaatttgaaaaaTCTTTTCAAGCAATTATATGAAGAATTAAAGAAGCATGATACCACGATaaaaaaaaCTTACGAAAAATACGGTCCAGATTTTTATCAATTACGAGAAGATTGGTGGAATAATAATAGAATAATGGTATGGTATGCTATAACGTGTGGTGCAACAGATGGTGATAAATATTTTAGAGAATCATCTTCTGATAAAGGTGGCACTTATGAAAAATGCCGATGTTCTAGTCATAAGGTCCCCACATATTTTGACTATGTGCCGCAGTATCTTCGC	DBLa0.4	0	4	0	4	4	0	0	0	0	4	0	0	0	0	0	4	0	0	0	0	0	0	0	0	0	0	4	0	0	0	0	0	0	0	0	0	0	0	0	0	0	0	0	0	0	0
#6_3rd_invitro_cluster_131	40	AGATATCGTACGCGGCAAAGATCTTTTCCTTGGTAATACATATGAAAGTGCACAAAGAGATCAATTAGAGAAGAATTTGAAAGATATTTTCACGCAAATATATAATGACGTGACAAATGATCAGACGAAGAAGGCGGAAGCAGAAAAACGCTACAATGATACTACAAATTATTTTCAATTAAGAGAAGACTGGTGGGCACTTAATAGAGAAACGGTATGGAAAGCCATAACATGTAGCGAGGACCTAAAAAATTCTTCATATTTTCGAGCAACATGTGGTAGTAGTGGAGAAACTCCGACTGATGATAAATGCCGATGTAGCGACAACCAAGTCCCCACATATTTTGACTACGTGCCACAGTATCTTCGC	DBLa0.5	0	1	0	0	1	0	0	0	0	1	0	0	0	1	0	0	0	0	0	0	0	0	0	1	0	0	0	0	0	0	0	0	0	0	1	0	0	0	0	0	0	0	0	0	0	0
#6_3rd_invitro_cluster_179=cluster 106 2nd	40	AGATATCGTACGCGGCAAAGATCTTTTTATAGGTTATAATGaaaaagatcaagaagaaaaaagaaaattacaagagaacttgagaaaaaTTTTCAAGGAAATATATAATAAATTGGGGGATACTGGAGCACAAGAACGCTACGAAGGTGATGAAGCCAATGATTTTTTTAAATTACGAGAAGATTGGTGGGATGCTAATAGACTAGAAGTATGGAAAGCTATCACTTGTGGTGCAGGAGAAAGTGATAAATATTTTAGAAAAACATGTTCTTCCGGAAATTCTAAGACGAGTGGACATTGTAAGTGTATTGATGGAACAGTTCCTACCAACTTGGATTATGTTCCTCAATATTTGAGA	DBLa0.12	0	4	0	3	3	0	0	0	0	3	0	0	0	3	0	0	0	0	0	0	0	0	3	0	0	0	0	0	0	0	0	0	0	3	0	0	0	0	0	0	2	0	0	0	0	0
#6_3rd_invitro_cluster_264=cluster 161ev	23	TGATATTATAAGAGGTAGAGATATGTTTCTTGGTAATAATGaaaaagatatgagagaaaaacagaaactgcaaaataatttaaaaaacatttttgggaaaaTTATGGAAAGTGATACAAATCTGAACACACAATCACTGGAAAAAGTTAGGGAATACTGGTGGGCGCTTAATAGAGAAGACGTATGGAAAGCATTAACATGTTCTGCGGATGGCAGTGAAGAATATTTCAAAAAACCAAGCAGCGATGAATACTCATTCTCAAATGGTCAATGCGGTCATAGGGATGAAAACGTCCCAACATATTTAGATTACGTCCCTCAATATTTACGT	DBLa1.5	0	27	21	0	0	21	0	0	0	0	1	0	19	6	13	1	0	0	0	0	0	3	8	7	0	0	1	0	0	1	0	8	0	0	7	0	0	5	1	0	0	0	7	1	0	0
#6_3rd_invitro_cluster_217=cluster 195 1st	21	TGATATTATTCGAGGAAAAGATCTATTTCTTGGTAATAATAaagaaaaaaagcaattagaagagaatttaaaaaaaattttcaaagaaaTATATGACAATTTGAAGAATACTGATGTACAAGAACACTACAAAGATGATGATAAAGTAACTAAAAATTATTATAAATTAAGGAATGATTGGTGGGAAGCTAATAGACAAGAAGTATGGAAAGCTATCACATGTGGCGCTGCGGGTGGTACATATTTTAGAAATACATGTGTTGGGGGAAATGAAACTGAAAGTAACTGCCGATGTAAGACAAATTATGTTCCTACATATTTTGACTACGTGCCGCAGTATCTTCGC	DBLa0.8	0	3	0	1	3	0	0	0	0	3	0	0	0	3	0	0	0	0	0	0	0	0	0	2	0	0	0	0	0	0	0	0	0	0	2	0	0	0	0	0	0	0	0	0	0	0
#6_3rd_invitro_cluster_3	17	AGATATCGTACGCGGCAAAGATCTGTATCGTGGTTATGATGataaagaaaaagaacaaagagataaaatagaaaagaatttaaaaaaaTATTTCCAACAAATACATGAGGAAGTGACGTCTAGCGGGAGTAATGGGCAGATAGAAGCACGCTACGGAAGTGATAAAGATCCAAATTTCTTTCAATTAAGGGAAGATTGGTGGGCACTTAATAGACAAGATGTATGGAAAGCAATTACATGTGAAGCATACGGTACATATTTTCGAAAAACATGTTCTGATGACACAGCAGACACTCATGAAAAATGCCGGTGTAAGGGCGACAAGCCAAAGCCCGGCAAGCCAAAGGCTGGCGACGGAGATGTAACTATTGTCCCCACATATTTTGACCACGTGCCTCA…	DBLa0.11	0	3	0	2	2	0	0	0	0	2	0	0	0	0	0	2	0	0	0	0	0	0	0	0	0	0	1	0	0	0	0	0	0	0	0	0	0	0	0	0	0	0	0	0	0	0
#6_3rd_invitro_cluster_159	16	TGATATTATACGAGGAAAAGATTTGTATCTCGGTAATaaaaaacaaaatgaaataaaaagagaaaaagaaaaattacaacaaaaTTTGAAGGAAATTTTCAAGAAGATACATGGTGGATTGACAGGTGATGCAAAAGAGTACTACCAAGATGATGATGGATCTGGAAATTATTATAAATTAAGGGAAGCTTGGTGGGCACTTAATAGACAAGATGTATGGAAAGCATTAATATGTGGTGCACCAGATGATGCTGATTATTTTATAAAAACAGCGTGTGGTGGAGGAAAGGGAACACATGGTTACTGCCGATGTATTAATTATGATGTTCCAACATATTTTGACTATGTGCCGCAGTTTCTTCGC	DBLa0.18	0	18	0	17	17	0	0	0	0	17	0	0	0	17	0	0	0	0	0	0	0	0	11	3	0	0	0	0	0	0	0	0	0	0	2	0	0	0	0	0	0	0	0	0	0	0
#6_3rd_invitro_cluster_176	15	AGATATTGTAAGAGGAAAAGATCTGTATCTCGGTTATGATGATaaagaaaaagaaaaaagaaaaCAATTAGAAAAGGAATTGAAAGATATTTTCAAGAATATATATGACAAATTGAAGAATGGGAAGACGAATGGCGCAGAAGCACGCTACAAAGATACTGATAATTATTATGAATTAAGAGAAGATTGGTGGACAGAGAATCGAGAAACAGTATGGAGAGCATTAACATGCAAGGCTGACGATAGTAATAGATATTTTCGACCAACATGTGCTGGAGGAACAACTTCAACTCAAGGTAAATGCCGATGTAACGACAACCAGGTCCCCACATATTTTGACTATGTGCCGCAGTATCTTCGC	DBLa0.12	0	4	0	3	3	0	0	0	0	3	0	0	0	3	0	0	0	0	0	0	0	0	3	0	0	0	0	0	0	0	0	0	0	3	0	0	0	0	0	0	2	0	0	0	0	0
#6_3rd_invitro_cluster_205	12	AGATATTGTCAGAGGCAAAGATCTTTATCTTGGTACCAATGaagagaaaaaaccattagaagaaaatttgaaaaaacttttcaaaaaCTTATATAAAGAATTGTCGAGGACGAATGGGGCGAAGGAGCTACAAGCTCGCTACGAAGGTGATGATAATTATTATCAATTACGAGAAGATTGGTGGGCACTGAATAGAAGATATGTATGGGATGCATTAACATGCGAAGCGCCAAATAATGCTAAATATTTTCGACAAACATGTTGTACAGGAACGGGAACACAAGGTCGATGCCGATGTGTGATTGGAGATGTCCCCACATATTTCGATTATGTGCCGCAGTTTCTTCGC	DBLa0.6	0	32	0	24	22	0	0	0	0	23	0	0	0	0	0	20	0	4	0	0	0	0	0	0	0	0	17	1	0	0	0	0	0	0	0	0	0	0	0	0	0	0	0	0	0	0
#6_3rd_invitro_cluster_221	12	CGATATTGTAAGAGGAAAAGATCTTTTTCTTGGTCATAGCAAAGAAAAAGAAAAATTAGAACAAAATTTGAAAAATCTTTTCAAGCAATTATATGAAGAATTAAAGAAGCATGATACCACGATaaaaaaaaCTTACGAAAAATACGGTCCAGATTTTTATCAATTACGAGAAGATTGGTGGAATAATAATAGAATAATGGTATGGTATGCTATAACGTGTGGTGCAACAGATGGTGATAAATATTTTAGAGAATCATCTTCTGATAAAGGTGGCACTGATGATAAATGCCGATGTAACGACAACCAGGTCCCCACATATTTTGACTATGTGCCACAGTATCTTCGC	DBLa0.4	2.68258e-177	1	0	1	1	0	0	0	0	1	0	0	0	0	0	1	0	0	0	0	0	0	0	0	0	0	1	0	0	0	0	0	0	0	0	0	0	0	0	0	0	0	0	0	0	0
#6_3rd_invitro_cluster_189	12	CGATATTATCAGAGGAAGAGATATGTTTAAATCTAATGGAAAAGTAGAAAAAGCTCTAAGAGAAGTTTTCAAGAAAATACATAGTGGTTTGAATAAAAGCAAAATTAATGATTATGATCATGATGGTACTGGAAACTACGTAAAATTAAGGGAAGATTGGTGGACGGCGAACAGAGACCAAGTATGGAAAGCCATAACATGTGATGCGCGAGATAATGCTCAATATTTTCGAGCAACATGTGCTGGAGAACAACGAACTAAAGGTTACTGCCGGTGTAACGGCGACAAGCCAGATAACGACATGGTAAATATCGATCCTCCTACATATTTTGACTACGTGCCGCAGTATCTTCGC	DBLa0.1	6.4319e-119	59	35	2	2	36	0	0	17	2	2	1	16	26	10	2	0	0	0	0	0	11	19	4	1	0	1	1	0	0	13	10	3	0	2	1	0	2	1	3	0	1	8	1	0	1
#6_3rd_invitro_cluster_128	11	TGATATTATTCGTGGAAAAGATCTTTTTATAGGTTATAATGaaaaagatagagaagaaaaaaaacaattacaagataatttaaaagatattttcaagaaaaTATATGAAGAATTGTCGAGGACGAATGGAGAGGCAGCAAAAAAGCACTACGAAGATAAGGATACTGACAAAAATTTTTTTCAATTACGAGAAGATTGGTGGGCTCTTAATAGAGACCAAGTATGGAAAGCTATCACATGCAGTGCTGGAGAGAATGATATATATTCAAAAACCACCGATAATGGTAAAACGACTGTTTTGTATTATAAATGCGGTCATGAGGATGAAAACGTTGCAACAAACTTGGATTACGTCCCTCAATTTTTACGA	DBLa0.6	0	4	0	3	3	0	0	0	0	3	0	0	0	3	0	0	0	0	0	0	0	0	2	0	0	0	0	0	0	0	0	2	0	0	0	0	0	0	0	0	0	0	2	0	0	0
#6_3rd_invitro_cluster_182	11	TGATATCATACGAGGAAGAGATCTTTTCCTCGGTAATGATaaagaaaaagaaaaaagaaaacaattagaaaaggaattgaaagATATTTTCAAGAATATATATGACAAATTGAAGAATGGGAAGACGAATGGCGCAGAAGCACGCTACAAAGATACTGATAATTATTATGAATTAAGAGAAGATTGGTGGACAGAGAATCGAGAAACAGTATGGAAAGCATTAACATGCAAGGCTGACGATAGTAATAGATATTTTCGACCAACATGTGCTGGAGGAACAACTTCAACTCAAGGTAAATGCCGATGTAACGACAACCAGGTCCCCACATATTTCGATTATGTGCCACAATATTTGAGA	DBLa0.12	0	4	0	3	3	0	0	0	0	3	0	0	0	3	0	0	0	0	0	0	0	0	3	0	0	0	0	0	0	0	0	0	0	3	0	0	0	0	0	0	2	0	0	0	0	0
					# hits in varDB	NTSA	NTSB	DBLa0	DBLa1	DBLa2	DBLpam1	CIDRa1	CIDRa2-6	CIDRb	CIDRg	CIDRd	DBLb	DBLg	DBLd	DBLe	DBLz	CIDRb	CIDRg	CIDRd	DBLb	DBLg	DBLd	DBLe	DBLz	CIDRb	CIDRg	CIDRd	DBLb	DBLg	DBLd	DBLe	DBLz	CIDRb	CIDRg	CIDRd	DBLb	DBLg	DBLd	DBLe	DBLz	CIDRb	CIDRg	CIDRd	DBLb
				Sample_total:	628	310	137	148	323	4	0	269	151	5	2	53	262	63	104	1	16	0	0	0	27	259	26	2	2	80	17	0	1	62	32	141	14	21	2	0	11	130	24	13	2	26	3	1	2
Interpreded Results				Position D1	Position D1	Position D2	Position D2	Position D2	Position D2	Position D3	Position D3	Position D3	Position D3	Position D3	Position D3	Position D4	Position D4	Position D4	Position D4	Position D4	Position D4	Position D4	Position D4	Position D5	Position D5	Position D5	Position D5	Position D5	Position D5	Position D5	Position D5	Position D6	Position D6	Position D6	Position D6	Position D6	Position D6	Position D6	Position D6	Domain 07	Domain 07	Domain 07	Domain 07	Domain 07	Domain 07	Domain 07	Domain 07	Domain 08	Domain 08
Sample_ID	Cluster_size			NTSA	NTSB	DBLa0	DBLa1	DBLa2	DBLpam1	CIDRa1	CIDRa2-6	CIDRb	CIDRg	CIDRd	CIDRa1.2-3	DBLb	DBLg	DBLd	DBLe	DBLz	CIDRb	CIDRg	CIDRd	DBLb	DBLg	DBLd	DBLe	DBLz	CIDRb	CIDRg	CIDRd	DBLb	DBLg	DBLd	DBLe	DBLz	CIDRb	CIDRg	CIDRd	DBLb	DBLg	DBLd	DBLe	DBLz	CIDRb	CIDRg	CIDRd	DBLb	DBLg
#6_3rd_invitro_cluster_86=cluster 76 2nd	336			0	1	1	0	0	0	0	1	0	0	0		0	0	1	0	0	0	0	0	0	0	0	0	0	0	0	0	0	0	0	0	0	0	0	0	0	0	0	0	0	0	0	0	0	0
#6_3rd_invitro_cluster_167=cluster 90 ev	263			0	0	1	0	0	0	0	1	0	0	0		0	0	1	0	0	0	0	0	0	0	0	0	0	1	0	0	0	0	0	0	0	0	0	0
#6_3rd_invitro_cluster_249=cluster 149 ev	245			1	0	0	1	0	0	0		0	0	0		1	0	0	0	0	0	0	0	0	0	0	0	0	0	0	0	0	0	0	0	0	0	0	0	0	0	0	0	0	0	0	0	0	0
#6_3rd_invitro_cluster_234=cluster 137 2nd	198
#6_3rd_invitro_cluster_241=cluster 142ev	141			0	1	1	0	0	0	0	1	0	0	0		0	0	1	0	0	0	0	0	0	0	0	0	0	0	0	0	0	0	0	0	0	0	0	0	0	0	0	0	0	0	0	0	0	0
#6_3rd_invitro_cluster_75=cluster 46 2nd	122			0	1	1	0	0	0	0	1	0	0	0		0	0	1	0	0	0	0	0	0	0	0	0	0	0	0	0	0	0	0	0	0	0	0	0	0	0	0	0	0	0	0	0	0	0
#6_3rd_invitro_cluster_127=cluster 68 ev	112			0	1	1	0	0	0	0	1	0	0	0		0	0	1	0	0	0	0	0	0	0	0	0	0	0	0	0	0	0	0	0	0	0	0	0	0	0	0	0	0	0	0	0	0	0
#6_3rd_invitro_cluster_268=cluster 168ev	107			0	1	1	0	0	0	0	1	0	0	0		0	0	1	0	0	0	0	0	0	0	0	0	0	1	0	0	0	0	0	0	0	0	0	0	0	0	0	0	0	0	0	0	0	0
#6_3rd_invitro_cluster_50	93			0	1	1	0	0	0	0	1	0	0	0		0	0	1	0	0	0	0	0	0	0	0	0	0	1	0	0	0	0	0	0	0	0	0	0	0	0	0	0	0	0	0	0	0	0
#6_3rd_invitro_cluster_111=cluster 56 ev	85
#6_3rd_invitro_cluster_39=cluster 19 ev	85			0	1	1	0	0	0	0	1	0	0	0		0	0	1	0	0	0	0	0	0	0	0	0	0	1	0	0	0	0	0	0	0	0	0	0	0	0	0	0	0	0	0	0	0	0
#6_3rd_invitro_cluster_94=cluster 60 2nd	84			0	0	1	0	0	0	0	1	0	0	0		0	0	1	0	0	0	0	0	0	0	0	0	0	1	0	0	0	0	0	0	0	0	0	0
#6_3rd_invitro_cluster_62=cluster 52 1st	75			0	1	1	0	0	0	0	1	0	0	0		0	0	1	0	0	0	0	0	0	0	0	0	0	1	0	0	0	0	0	0	0	0	0	0	0	0	0	0	0	0	0	0	0	0
#6_3rd_invitro_cluster_216=cluster 130 ev	72			0	1	1	0	0	0	0	1	0	0	0		1	0	0	0	0	0	0	0	0	0	0	0	0	0	0	0	0	0	0	0	0	0	0	0	0	0	0	0	0	0	0	0	0	0
#6_3rd_invitro_cluster_8=cluster 8ev	68			0	1	1	0	0	0	0	1	0	0	0		0	0	1	0	0	0	0	0	0	0	0	0	0	0	0	0	0	0	0	0	0	0	0	0	0	0	0	0	0	0	0	0	0	0
#6_3rd_invitro_cluster_235=cluster 138 ev	64			1	0	0	1	0	0	0		0	0	0	1	1	0	0	0	0	0	0	0	0	1	0	0	0	0	0	0	0	0	0	1	0	0	0	0	0	1	0	0	0	0	0	0	0	0
#6_3rd_invitro_cluster_104	57			0	0	1	0	0	0	0	1	0	0	0		1	0	0	0	0	0	0	0	0	0	1	0	0	0	0	0	0	0	0	0	0	1	0	0	0	0	0	0	0	0	0	0
#6_3rd_invitro_cluster_240=cluster 143 ev	49			0	1	0	0	1	0	1		0	0	0		1	0	0	0	0	0	0	0	0	1	0	0	0	0	0	0	0	0	0	0	0	0	0	0	0	0	0	0	0	0	0	0	0	0
#6_3rd_invitro_cluster_252=cluster 150 ev	46			1	0	0	1	0	0	1		0	0	0		0	0	0	0	0	0	0	0	0	0	0	0	0	0	0	0	0	0	0	0	0	0	0	0	0	0	0	0	0	0	0	0	0	0
#6_3rd_invitro_cluster_215=cluster 131ev	44			0	1	1	0	0	0	0	1	0	0	0		0	0	1	0	0	0	0	0	0	0	0	0	0	1	0	0	0	0	0	0	0	0	0	0	0	0	0	0	0	0	0	0	0	0
#6_3rd_invitro_cluster_131	40			0	0	1	0	0	0	0	1	0	0	0		1	0	0	0	0	0	0	0	0	0	1	0	0	0	0	0	0	0	0	0	0	1	0	0	0	0	0	0	0	0	0	0
#6_3rd_invitro_cluster_179=cluster 106 2nd	40			0	1	1	0	0	0	0	1	0	0	0		1	0	0	0	0	0	0	0	0	1	0	0	0	0	0	0	0	0	0	0	1	0	0	0	0	0	0	1	0	0	0	0	0	0
#6_3rd_invitro_cluster_264=cluster 161ev	23			1	0	0	1	0	0	0		0	0	1		0	0	0	0	0	0	0	0	0	0	0	0	0	0	0	0	0	0	0	0	0	0	0	0	0	0	0	0	0	0	0	0	0	0
#6_3rd_invitro_cluster_217=cluster 195 1st	21			0	1	1	0	0	0	0	1	0	0	0		1	0	0	0	0	0	0	0	0	0	1	0	0	0	0	0	0	0	0	0	0	1	0	0	0	0	0	0	0	0	0	0	0	0
#6_3rd_invitro_cluster_3	17			0	1	1	0	0	0	0	1	0	0	0		0	0	1	0	0	0	0	0	0	0	0	0	0	1	0	0	0	0	0	0	0	0	0	0	0	0	0	0	0	0	0	0	0	0
#6_3rd_invitro_cluster_159	16			0	1	1	0	0	0	0	1	0	0	0		1	0	0	0	0	0	0	0	0	1	0	0	0	0	0	0	0	0	0	0	0	1	0	0	0	0	0	0	0	0	0	0	0	0
#6_3rd_invitro_cluster_176	15			0	1	1	0	0	0	0	1	0	0	0		1	0	0	0	0	0	0	0	0	1	0	0	0	0	0	0	0	0	0	0	1	0	0	0	0	0	0	1	0	0	0	0	0	0
#6_3rd_invitro_cluster_205	12			0	1	1	0	0	0	0	1	0	0	0		0	0	1	0	0	0	0	0	0	0	0	0	0	1	0	0	0	0	0	0	0	0	0	0	0	0	0	0	0	0	0	0	0	0
#6_3rd_invitro_cluster_221	12			0	1	1	0	0	0	0	1	0	0	0		0	0	1	0	0	0	0	0	0	0	0	0	0	1	0	0	0	0	0	0	0	0	0	0	0	0	0	0	0	0	0	0	0	0
#6_3rd_invitro_cluster_189	12			1	0	0	1	0	0	0		0	0	0		0	0	0	0	0	0	0	0	0	0	0	0	0	0	0	0	0	0	0	0	0	0	0	0	0	0	0	0	0	0	0	0	0	0
#6_3rd_invitro_cluster_128	11			0	1	1	0	0	0	0	1	0	0	0		1	0	0	0	0	0	0	0	0	1	0	0	0	0	0	0	0	0	1	0	0	0	0	0	0	0	0	0	0	1	0	0	0	0
#6_3rd_invitro_cluster_182	11			0	1	1	0	0	0	0	1	0	0	0		1	0	0	0	0	0	0	0	0	1	0	0	0	0	0	0	0	0	0	0	1	0	0	0	0	0	0	1	0	0	0	0	0	0
			Hit Rate:	0.151398	0.566382	0.71972	0.151398	0.0190217	0	0.0368789	0.71972	0	0	0.00892857	0.0248447	0.248835	0	0.60986	0	0	0	0	0	0	0.0799689	0.0458075	0	0	0.307453	0	0	0	0	0.00427019	0.0248447	0.0256211	0.0520186	0	0	0	0.0248447	0	0.0256211	0	0.00427019	0	0	0	0
Suggested Composition
Sample_ID
#6_3rd_invitro_cluster_86=cluster 76 2nd	NTSB	DBLa0.9	CIDRa2.1	DBLd1
#6_3rd_invitro_cluster_167=cluster 90 ev		DBLa0.16	CIDRa3.4	DBLd1	CIDRb1
#6_3rd_invitro_cluster_249=cluster 149 ev	NTSA	DBLa1		DBLb
#6_3rd_invitro_cluster_234=cluster 137 2nd
#6_3rd_invitro_cluster_241=cluster 142 ev	NTSB	DBLa0.18	CIDRa4	DBLd1
#6_3rd_invitro_cluster_75=cluster 46 2nd	NTSB	DBLa0.9	CIDRa2.1	DBLd1
#6_3rd_invitro_cluster_127=cluster 68 ev	NTSB3	DBLa0.11	CIDRa2.4	DBLd1
#6_3rd_invitro_cluster_268=cluster 168 ev	NTSB3	DBLa0.10	CIDRa2.2	DBLd1	CIDRb
#6_3rd_invitro_cluster_50	NTSB3	DBLa0.5	CIDRa2.6	DBLd1	CIDRb
#6_3rd_invitro_cluster_111=cluster 56 ev
#6_3rd_invitro_cluster_39=cluster 19 ev	NTSB3	DBLa0.1	CIDRa3.2	DBLd1	CIDRb5
#6_3rd_invitro_cluster_94=cluster 60 2nd		DBLa0.16	CIDRa3.4	DBLd1	CIDRb1
#6_3rd_invitro_cluster_62=cluster 52 1st	NTSB3	DBLa0.16	CIDRa3.4	DBLd1	CIDRb1
#6_3rd_invitro_cluster_216=cluster 130 ev	NTSB	DBLa0.18	CIDRa6	DBLb5
#6_3rd_invitro_cluster_8=cluster 8ev	NTSB3	DBLa0.11	CIDRa2.4	DBLd1
#6_3rd_invitro_cluster_235=cluster 138 ev	NTSA1	DBLa1.1	CIDRa1.2	DBLb11	DBLg1	DBLe1	DBLg1	DBLz	DBLe1	DBLg1
#6_3rd_invitro_cluster_104		DBLa0.5	CIDRa2.9	DBLb8	DBLd1	CIDRb1
#6_3rd_invitro_cluster_240=cluster 143 ev	NTSB3	DBLa2	CIDRa1.1	DBLb3	DBLg4
#6_3rd_invitro_cluster_252=cluster 150 ev	NTSA7	DBLa1.2	CIDRa1.7
#6_3rd_invitro_cluster_215=cluster 131 ev	NTSB7	DBLa0.4	CIDRa3.1	DBLd1	CIDRb1
#6_3rd_invitro_cluster_131		DBLa0.5	CIDRa2.9	DBLb8	DBLd1	CIDRb1
#6_3rd_invitro_cluster_179=cluster 106 2nd	NTSB3	DBLa0.12	CIDRa2.1	DBLb5	DBLg	DBLz	DBLe
#6_3rd_invitro_cluster_264=cluster 161 ev	NTSA4	DBLa1.5	CIDRd1
#6_3rd_invitro_cluster_217=cluster 195 1st	NTSB4	DBLa0.8	CIDRa5	DBLb5	DBLd1	CIDRb
#6_3rd_invitro_cluster_3	NTSB3	DBLa0.11	CIDRa6	DBLd1	CIDRb1
#6_3rd_invitro_cluster_159	NTSB3	DBLa0.18	CIDRa6	DBLb5	DBLg	CIDRb1
#6_3rd_invitro_cluster_176	NTSB3	DBLa0.12	CIDRa2.1	DBLb5	DBLg	DBLz	DBLe
#6_3rd_invitro_cluster_205	NTSB3	DBLa0.6	CIDRa3.1	DBLd1	CIDRb1
#6_3rd_invitro_cluster_221	NTSB7	DBLa0.4	CIDRa3.1	DBLd1	CIDRb1
#6_3rd_invitro_cluster_189	NTSA	DBLa1
#6_3rd_invitro_cluster_128	NTSB4	DBLa0.6	CIDRa3.1	DBLb5	DBLg5	DBLd1	CIDRb1
#6_3rd_invitro_cluster_182	NTSB3	DBLa0.12	CIDRa2.1	DBLb5	DBLg	DBLz	DBLe
[truncated: 177 more columns]

## Sheet: #9_ex vivo
	Total reads	Singletons
	1547	64
						Position D1	Position D1	Position D2	Position D2	Position D2	Position D2	Position D3	Position D3	Position D3	Position D3	Position D3	Position D4	Position D4	Position D4	Position D4	Position D4	Position D4	Position D4	Position D4	Position D5	Position D5	Position D5	Position D5	Position D5	Position D5	Position D5	Position D5	Position D6	Position D6	Position D6	Position D6	Position D6	Position D6	Position D6	Position D6	Domain 07	Domain 07	Domain 07	Domain 07	Domain 07	Domain 07	Domain 07	Domain 07	Domain 08
Sample_ID	Cluster_size	Blast_cluster_sequnece	Best Blast hit	E-value	# hits in varDB	NTSA	NTSB	DBLa0	DBLa1	DBLa2	DBLpam1	CIDRa1	CIDRa2-6	CIDRb	CIDRg	CIDRd	DBLb	DBLg	DBLd	DBLe	DBLz	CIDRb	CIDRg	CIDRd	DBLb	DBLg	DBLd	DBLe	DBLz	CIDRb	CIDRg	CIDRd	DBLb	DBLg	DBLd	DBLe	DBLz	CIDRb	CIDRg	CIDRd	DBLb	DBLg	DBLd	DBLe	DBLz	CIDRb	CIDRg	CIDRd	DBLb
#9_exvivo_cluster_74	292	GGACATTGTCAGAGGAAAAGATCTTTTCCTTGGTCATCAACaaagaaaaaaaagaattagaagaaaatttgaaaaaaattttcaagaaaaTACATGGTGGATTGACAGATAGTGGTGCAAAAAATCACTACCAAGATGATAATGATGGAAATTTTTATCAATTAAGAGAAGATTGGTGGAATAATAATAGAATAATGGTATGGCGCGCGATAACATGCGGCGCTGCGGGTGGTAAATATTTTAGAAAAACATGTTCTAATGACACATCAGACACTAACGAAAAATGCCGATGTACCATTCATGGTGTTCCTACATATTTCGATTATGTGCCGCAGTATCTTCGG	DBLa0.9	6.33117e-109	2	0	0	0	0	0	0	0	0	0	0	0	0	0	0	0	0	0	0	0	0	0	0	0	0	0	0	0	0	0	0	0	0	0	0	0	0	0	0	0	0	0	0	0	0
#9_exvivo_cluster_37	279	GTGATATCGTACGCGGCAAAGATCCATTTTATGGTAATCCAcaagaaaaagaaaaaagagaagacttagaaaagaatttgaaaaCAATTTTCAAGCAAATACATGAGGGATTGTCGAGGACGAATGGGAAGAATGGGGAGATAGAAACTCGCTACAAAGATGACGGTGATAAATTTTTTCAATTAAGGGAAGATTGGTGGACTGCAAATCGGCACACCGTGTGGAAAGCTATCACGTGCAGCGCTGGGAGTGGTAAATATTTTCGACGAACATGTGTTGGGGGAAATGAAACTGAAAGTAACTGCCGCTGTGACGACAAGCCAAATACCAATCCCCCAACCTATTTCGATTATGTGCCGCAGTTTCTTCGC	DBLa0.9	1.08783e-116	3	0	2	2	0	0	0	0	2	0	0	0	0	2	0	0	0	0	0	0	0	0	1	0	0	0	0	0	0	0	0	0	0	0	1	0	0	0	0	1	0	0	0	0	0
#9_exvivo_cluster_23	264	TGATATCATACGAGGAAGAGATCTGTATCGTGGTAATGATAaagaaaatgataaattagaaaggaaattaaaaaaaatttttcaagaaaatACATAGTGGATTGACGACGAAGAAGAGGAAGACGAAGACCTCGGCAAAAGAATACTACGAAGATAAGGATACTGACAAAAACTATTATAAATTAAGAGAAGATTGGTGGGACGCAAATCGCGCCACAGTATGGAAAGCTATCACGTGCGACGTTCATGGTTCTGACTATTTTCGACCAACATGTGGTGGTGATAAAGAAAACACTGCAACTCGGGTTAAAGACAAATGCCGGTGTGGCAACGACCAAGTCCCCACATATTTCGACTATGTGCCACAGTATCTTCGC	DBLa0.15	0	6	0	4	4	0	0	0	0	4	0	0	0	0	0	3	0	0	0	0	0	0	0	0	0	0	2	0	0	0	0	0	0	0	0	0	0	0	0	0	0	0	0	0	0	0
#9_exvivo_cluster_51	83	TGATATCGTACGCGGCAAAGATTTGTATCTCGGTGGTAATACCAAAGaaaaaaaaaCAAAGAGATGACTTAGAAAAGAATTTACAAAACATTTTCGCGAAAATATATGGAGAATTGATAAAGAAAAAGACGGAAGCAAAAGAACACTACGAAGATGGCGCTCCAGAGTTTTATAAATTAAGAGAAGATTGGTGGGCACTTAATAGACAAGATGTATGGAAAGCATTAACATGTGATGCAGGACAAGGTGCTCAATATGTTGGACTTACATGTTCTGAAGGACGAAGTTCGGCTCATCAAAAATGCACATGCGCTAATGGAGATGTCCCCACATATTTTGATTATGTGCCGCAGTTTCTTCGC	DBLa0.6	0	3	0	2	2	0	0	0	0	2	0	0	0	0	0	2	0	0	0	0	0	0	0	0	0	0	2	0	0	0	0	0	0	0	0	0	0	0	0	0	0	0	0	0	0	0
#9_exvivo_cluster_14	73	TGATATCGTACGCGGCAAAGATCTATTTCGTGGTAATAATGAAGaaaaaaaaaCAAAGAAAAGAATTAGACAAGAAGTTGAAAGAAATTTTCCAACAAATACATAGTGAAGTGACGTCTAGCGGGAGTAATTGGAAGGCTCTAAAAACACGCTACAAAGATGATGCCAAAAAATATTATTCTAAATTACGAGAAGATTGGTGGAACGCGAATCGGCACACCGTGTGGGAAGCTATCACGTGTGAAGTTAAGAGTGGTTCTGACTATTTTCGACCAACATGTGGTAATAGTGGAAGTCCATCTATGGCTAGAGACAAATGCCGGTGTGGCAACGGCGACGTAAGTATTGTCCCCACATATTTTGACTACGTGCCGCAGTATCTTCGG	DBLa0.5	0	3	0	2	2	0	0	0	0	2	0	0	0	0	0	2	0	0	0	0	0	0	0	0	0	0	1	0	0	0	0	0	1	0	0	0	0	0	0	0	0	0	0	0	0	0
#9_exvivo_cluster_70	61	TGATATTATACGAGGAAAAGATCTTTATATTCGTAATAAACaagaaaaagatagattagaaaagaatttgaaaaaaattttccagaaaaTATATGAAGGATTGACGACGACGAACGGCGCACAAGAACACTACCAAGATGAAAATGGTGGAAATTTTTTTAAATTACGAGAAGATTGGTGGAATATCAATAGaaaaaaaaGTATGGGATGCTATCACATGTAACGCTTGGGGTAATACATATTTTCGAGGAACATGTTCTAATGACACAGCTTTGGCTAAAAATAACTGCCAATGTATTGACCAAACGGTTCCCACTAATTTTGATTATGTGCCGCAGTATCTTCGC	DBLa0.12	0	2	0	1	1	0	0	0	0	1	0	0	0	0	0	1	0	0	0	0	0	0	0	0	0	0	1	0	0	0	0	0	0	0	0	0	0	0	0	0	0	0	0	0	0	0
#9_exvivo_cluster_0	48	GTGACATTATACGAGGAAAAGATCTTTATCTCGGTGATAATATaaaagatagagaacaaaaacaaaaattacaagaaaatttgaaaacaattttcgggaaaaTATATGATGAAGTGACGAGAGGGAAGACGAATGGGAAGAAGGAGGAGATAGAAACTCGCTACAAAAAAGATGATGAGGATGGAAATTTTTTTCAATTACGAGAAGATTGGTGGGCACTTAACAGAGATCAAGTATGGCAAGCCATCACATGCAAAGCGAACGGTACATACTTTCGTCCAACATGCGGTGATAGTGATAGTCCATCTCAAGCTCAAAAACAATGCCGGTGTGACGACGACAAGCCAAAGAGCGCAAAGCCCGGCAAGGCAAATGACAACGTAAATATTGTTCCCACCT…	DBLa0.11	0	6	0	4	4	0	0	0	0	4	0	0	0	0	0	4	0	0	0	0	0	0	0	0	0	0	1	3	0	0	0	0	0	1	0	0	0	0	0	0	1	0	0	0	0	0
#9_exvivo_cluster_54	45	GAGACATAATACGAGGAAGAGATTTGTATGGTGGTAATAATAAGAGAAGACAACAATTAGAAGAGAATTTAAGAAAAATTTTCGCGAATATATATGAAGAATTGTCGAGGACGCCGACGAAGAATGGGCAGAAGTCTGCAAAAGGACACTACGGAAGTGATGCTCCAAATTTTTATAAATTACGAGAAGATAGGTGGAATAATAATAGAATAATGGTATGGTACGCGATAACGTGCGGCGTTAAGGGTAATAAATATTTTCGACAAACATGTGGTTCAGGAGAATGGACTAAAGACAATTGCCGATGTACCATTCATGGTGTTCCCACATATTTTGACTACGTGCCGCAGTATCTTCGC	DBLa0.9	1.08783e-116	3	0	2	2	0	0	0	0	2	0	0	0	0	2	0	0	0	0	0	0	0	0	1	0	0	0	0	0	0	0	0	0	0	0	1	0	0	0	0	1	0	0	0	0	0
#9_exvivo_cluster_82	43	TGATATTACACGAGGAAAAGATCTTTATCGTGGAAATAAACAAGAAAAAGATGCATTACAAGAGCAATTAAAGAAATATTTCAAGGAGCTTCATAATCATTTAAAGCAGCAAGAAAAAAATTACTATGAAGATAGAAATGGAAATTATTATCTATTAAGAGAAGATTGGTGGGCACTTAATAGAAAAGATGTTTGGAAAGCATTAACATGTGAAGCATACGGTACATATTTTCGACACACATGTAATGGACAAAATCCAACTCAGACTGAAGATAACTGCCAATGTATCAATGGTGATGTCCCCACATATTTTGACTACGTCCCTCAACATTTACGT	DBLa0.6	7.32581e-173	1	0	1	1	0	0	0	0	1	0	0	0	0	0	0	0	0	0	0	0	0	0	0	0	0	0	0	0	0	0	0	0	0	0	0	0	0	0	0	0	0	0	0	0	0
#9_exvivo_cluster_9	38	TGATATCGTACGCGGCAAAGATCTTTTCCTTGGTAATCCAGAAGAAATAAAACAAAGACAACAATTAGACAAGAAGTTGAAAGATATTTTCACGCAAATATATAATGAGGTGACGAATGGGAAGAAGTCGGAGCTACAAGCTCGCTACGATGGTGACGGTCCAAATTTTTTTAAATTACGAGAAGATTGGTGGAACGCGAATCGGCACACCGTGTGGAAAGCCATCACGTGCGGCACACATAAGGGTGATACATATTTTCGAACAACGTGCATTGATCTTAATGGAAGTGGAGCCCAAGCTAATAACTACTGCCGGTGTAACGGCGACCAGCCAAATGACGACAAGCCAAATATCGATCCCCCAACCTATTTAGATTATGTGCCGCAGTTTCTTCGC	DBLa0.6	0	3	0	2	2	0	0	0	0	2	0	0	0	0	0	2	0	0	0	0	0	0	0	0	0	0	2	0	0	0	0	0	0	0	0	0	0	0	0	0	0	0	0	0	0	0
#9_exvivo_cluster_16	31	AGATATTATACGAGGAAAAGATTTGTATCGTCGAGATAAAGGAAAAAGAGATAAATTAGAAGATAAGTTGAAAGAGGTTTTTGGGAAAATATATAATGAGTTGACGTCGACGAATGGTGTAAAATCTCGCTACAATGGTGATGAAGCCAATAATTATTATCAATTACGAGAAGATTGGTGGGCACTTAACAGAGACCAAGTCTGGAAAGCCATCACGTGCGGCGCGGACGCTGGTAATAAATATTTTCGACAAACATGTGGTAGTGGAAAAACTGCAATTCGGACTCCTAGTCAATGCCGGTGTGGCGACGGCAAAAAGACCGGCACAAATGAGACCGACCAGGTCCCCACATATTTTGACTACGTGCCACAGTTTCTTCGC	DBLa0.1	0	3	0	1	1	0	0	0	0	1	0	0	0	0	0	1	0	0	0	0	0	0	0	0	0	0	0	1	0	0	0	0	0	0	0	0	0	0	0	0	0	0	0	0	0	0
#9_exvivo_cluster_80	30	GTGATATTGTAAGAGGAATAGATATGTTTAAACCAAATGTCCATGACAAAGTAGAAAAGGGTCTCCGAGAGGTTTTCAAGAAAATACATGATGAAATGGAAGGTGAGGTAAAAAATGATTACAATCCTGATGGATCTGGAAATTATTATAAATTAAGAGAAGCATGGTGGGATGTGAATAGAAATAAAGTATGGCAAGCCATAACCTGTGGCGCACTACCTAAATCTGCATATTTCTTGCAATCAGAAGATAATAAACAATTATTTTTATATCCTAAATGCGGCCATAATAATAAGAATGATCTTCCTACCAATTTAGATTATGTTCCTCAATATTTACGT	DBLa1.1	0	200	152	0	1	157	0	0	157	1	0	0	0	156	0	0	0	0	0	0	0	0	147	0	1	0	0	0	0	0	0	0	132	0	0	0	0	0	113	0	1	0	0	0	0	0
#9_exvivo_cluster_66	21	GGATATAATAAAAGGAAAAGATCTTTATCTTGGTAATAAAAAGCAATAtgaaactgaaagggaaaaggaaatattgcaaaaaaatttaaaaagtattttcaaaaaaaTATATGGAGACTTGAGCGAATCGGCAAAAAAAGCACTACGGAGATGATGAAAATTATTATCAACTAAGGGAAGATTGGTGGAATGCTAATAGACAACAAATATGGAAAGCTATAACATGTGGTGCTCCATCAGATGCTCAATATTTTAGAAGTACATGTTCATCTAAAGGTGGGAATTATGAAAAATGCCATTGTATTGGTGGAGATGTTCTTACAAATTTCGATTATGTGCCTCAATATTTACGT	DBLa0.15	0	1	0	0	1	0	0	0	0	1	0	0	0	0	0	0	0	0	0	0	0	0	0	0	0	0	0	0	0	0	0	0	0	0	0	0	0	0	0	0	0	0	0	0	0	0
#9_exvivo_cluster_71	16	AGATATTGTCAGAGGAAAAGATCTTTTTCTTGGGCATAAACAAAGAAAAAATGAATTAGAAGCAAGATTACAAAAAATTTTCGGGAAAATACATGAAGGATTGTCGAAGGCGAATGGTGTAAAAGATGGCTACAATGATGATGCTCCATATTATTATAAATTACGAGAAGATTGGTGGGATGCCAATAGACTTGATGTATGGAAAGCCATCACATGTGATGCACCAGAAGATGCTAAATATAATGTAATTGCATCAGATGGAACTAGAAGAGAATCTAACTATAAAAAATGTAGAGACTTTGCAGATGTTACTACCAATTTCGATTATGTGCCACAATATTTAAGA	DBLa0.18	0	17	0	14	14	0	0	0	0	14	0	0	0	4	0	9	0	0	0	0	0	0	0	4	0	0	5	2	0	0	0	0	0	1	3	1	0	0	0	0	1	0	0	0	0	0
#9_exvivo_cluster_76	12	GAGACATTATACGAGGAAAAGATATGTATGTTGTAAATAAAGGagaaaaaagaagattggaagataatttaaaaaaaattttcaagaaaaTACATAATAATTTGCAGGATACTGAAGCACAAAATCATTACAACGGTGATAAAAACAATAATTATTTTCAATTACGAGAAGATTGGTGGAACGCTAATAGACAAGAAGTATGGAAAGCAATTACATGTGATGCTGGGAATGCTCAATATGTTGGACTTACATGTTCTGAAGGAGGAAGTTCGGCTCATGAAAAATGCACATGTGCTAACGGAGATGTACCTACATATTTTGACTATGTGCCACAATATTTGAGA	DBLa0.6	0	11	0	9	9	0	0	0	0	9	0	0	0	8	0	0	1	0	0	0	0	0	7	0	0	0	0	0	0	0	0	0	0	4	0	0	0	0	0	0	1	0	0	0	0	0
#9_exvivo_cluster_68	11	CGATATTATCAGAGGTAAAGATCTATTTCTTGGTGGCCCTGATCAAGAAAAAAAGAAATTAGAAGAGAACTTGAGAAACATTTTCAAGAATATACATGATCATTTGACGGATGCAAAAGCAAAGTCGTACTACAAAAATGATAATGACCGAAATTATTTCAAATTAAGAAACGATTGGTGGGAACTAAATAGACAACAAGTATGGAATGCTATAACGTGTGGTGCTCCATCAGATGCTCAATATTTTAGAAATACATGTTCTTCCATTAAGGGTGGGCATTATAAAAATTGCCATTGTATTGGTGGTGATGTTCTTACAAATTTCGATTACGTCCCTCAATATTTAAGA	DBLa0.4	0	200	0	154	155	0	0	0	0	152	0	0	0	145	1	0	1	3	0	0	0	0	127	1	0	0	0	0	0	0	0	112	0	0	1	0	0	0	0	0	0	0	69	38	0	0
					# hits in varDB	NTSA	NTSB	DBLa0	DBLa1	DBLa2	DBLpam1	CIDRa1	CIDRa2-6	CIDRb	CIDRg	CIDRd	DBLb	DBLg	DBLd	DBLe	DBLz	CIDRb	CIDRg	CIDRd	DBLb	DBLg	DBLd	DBLe	DBLz	CIDRb	CIDRg	CIDRd	DBLb	DBLg	DBLd	DBLe	DBLz	CIDRb	CIDRg	CIDRd	DBLb	DBLg	DBLd	DBLe	DBLz	CIDRb	CIDRg	CIDRd	DBLb
				Sample_total:	464	152	198	201	157	0	0	157	198	0	0	0	313	5	24	2	3	0	0	0	0	281	7	1	0	14	6	0	0	0	112	133	6	4	3	0	0	113	0	6	0	69	38	0	0
Interpreded Results				Position D1	Position D1	Position D2	Position D2	Position D2	Position D2	Position D3	Position D3	Position D3	Position D3	Position D3	Position D3	Position D4	Position D4	Position D4	Position D4	Position D4	Position D4	Position D4	Position D4	Position D5	Position D5	Position D5	Position D5	Position D5	Position D5	Position D5	Position D5	Position D6	Position D6	Position D6	Position D6	Position D6	Position D6	Position D6	Position D6	Domain 07	Domain 07	Domain 07	Domain 07	Domain 07	Domain 07	Domain 07	Domain 07	Domain 08	Domain 08
Sample_ID	Cluster_size			NTSA	NTSB	DBLa0	DBLa1	DBLa2	DBLpam1	CIDRa1	CIDRa2-6	CIDRb	CIDRg	CIDRd	CIDRa1.2-3	DBLb	DBLg	DBLd	DBLe	DBLz	CIDRb	CIDRg	CIDRd	DBLb	DBLg	DBLd	DBLe	DBLz	CIDRb	CIDRg	CIDRd	DBLb	DBLg	DBLd	DBLe	DBLz	CIDRb	CIDRg	CIDRd	DBLb	DBLg	DBLd	DBLe	DBLz	CIDRb	CIDRg	CIDRd	DBLb	DBLg
#9_exvivo_cluster_74	292
#9_exvivo_cluster_37	279			0	1	1	0	0	0	0	1	0	0	0		0	1	0	0	0	0	0	0	0	0	1	0	0	0	0	0	0	0	0	0	0	0	1	0	0	0	0	1	0	0	0	0	0	0
#9_exvivo_cluster_23	264			0	1	1	0	0	0	0	1	0	0	0		0	0	1	0	0	0	0	0	0	0	0	0	0	1	0	0	0	0	0	0	0	0	0	0	0	0	0	0	0	0	0	0	0	0
#9_exvivo_cluster_51	83			0	1	1	0	0	0	0	1	0	0	0		0	0	1	0	0	0	0	0	0	0	0	0	0	1	0	0	0	0	0	0	0	0	0	0	0	0	0	0	0	0	0	0	0	0
#9_exvivo_cluster_14	73			0	1	1	0	0	0	0	1	0	0	0		0	0	1	0	0	0	0	0	0	0	0	0	0	1	0	0	0	0	0	1	0	0	0	0	0	0	0	0	0	0	0	0	0	0
#9_exvivo_cluster_70	61			0	1	1	0	0	0	0	1	0	0	0		0	0	1	0	0	0	0	0	0	0	0	0	0	1	0	0	0	0	0	0	0	0	0	0	0	0	0	0	0	0	0	0	0	0
#9_exvivo_cluster_0	48			0	1	1	0	0	0	0	1	0	0	0		0	0	1	0	0	0	0	0	0	0	0	0	0	0	1	0	0	0	0	0	1	0	0	0	0	0	0	1	0	0	0	0	0	0
#9_exvivo_cluster_54	45			0	1	1	0	0	0	0	1	0	0	0		0	1	0	0	0	0	0	0	0	0	1	0	0	0	0	0	0	0	0	0	0	0	1	0	0	0	0	1	0	0	0	0	0	0
#9_exvivo_cluster_82	43			0	1	1	0	0	0	0	1	0	0	0		0	0	0	0	0	0	0	0	0	0	0	0	0	0	0	0	0	0	0	0	0	0	0	0	0	0	0	0	0	0	0	0	0	0
#9_exvivo_cluster_9	38			0	1	1	0	0	0	0	1	0	0	0		0	0	1	0	0	0	0	0	0	0	0	0	0	1	0	0	0	0	0	0	0	0	0	0	0	0	0	0	0	0	0	0	0	0
#9_exvivo_cluster_16	31			0	1	1	0	0	0	0	1	0	0	0		0	0	1	0	0	0	0	0	0	0	0	0	0	0	1	0	0	0	0	0	0	0	0	0	0	0	0	0	0	0	0	0	0	0
#9_exvivo_cluster_80	30			1	0	0	1	0	0	0		0	0	0	1	1	0	0	0	0	0	0	0	0	1	0	0	0	0	0	0	0	0	0	1	0	0	0	0	0	1	0	0	0	0	0	0	0	0
#9_exvivo_cluster_66	21			0	0	1	0	0	0	0	1	0	0	0		0	0	0	0	0	0	0	0
#9_exvivo_cluster_71	16			0	1	1	0	0	0	0	1	0	0	0		0	0	0	0	0	0	0	0	0	0	0	0	0	0	0	0	0	0	0	0	0	0	0	0	0	0	0	0	0	0	0	0	0	0
#9_exvivo_cluster_76	12			0	1	1	0	0	0	0	1	0	0	0		1	0	0	0	0	0	0	0	0	1	0	0	0	0	0	0	0	0	0	0	1	0	0	0	0	0	0	1	0	0	0	0	0	0
#9_exvivo_cluster_68	11			0	1	1	0	0	0	0	1	0	0	0		1	0	0	0	0	0	0	0	0	1	0	0	0	0	0	0	0	0	1	0	0	0	0	0	0	0	0	0	0	0	0	0	0	0
			Hit Rate:	0.0222717	0.74536	0.76095	0.0222717	0	0	0	0.76095	0	0	0	0.0222717	0.0393467	0.240535	0.44395	0	0	0	0	0	0	0.0393467	0.240535	0	0	0.385301	0.0586488	0	0	0	0.0081663	0.0764662	0.0445434	0	0.240535	0	0	0.0222717	0	0.285078	0	0	0	0	0	0
Suggested Composition
Sample_ID
#9_exvivo_cluster_74
#9_exvivo_cluster_37	NTSB3	DBLa0.9	CIDRa2.7	DBLg13	DBLd1	CIDRg2	DBLe2	DBLe2	DBLe2
#9_exvivo_cluster_23	NTSB	DBLa0	CIDRa2.5	DBLd1	CIDRb1
#9_exvivo_cluster_51	NTSB	DBLa0.6	CIDRa3.2	DBLd1	CIDRb6
#9_exvivo_cluster_14	NTSB3	DBLa0.5	CIDRa2.3	DBLd1	CIDRb1	DBLe4
#9_exvivo_cluster_70	NTSB7	DBLa0.12	CIDRa4	DBLd1	CIDRb5
#9_exvivo_cluster_0	NTSB3	DBLa0.11	CIDRa2.4	DBLd1		DBLz6	DBLe9
#9_exvivo_cluster_54	NTSB3	DBLa0.9	CIDRa2.7	DBLg13	DBLd1	CIDRg2	DBLe2	DBLe2	DBLe2
#9_exvivo_cluster_82	NTSB3	DBLa0.6	CIDRa3.1
#9_exvivo_cluster_9	NTSB	DBLa0.6	CIDRa3.2	DBLd1	CIDRb6
#9_exvivo_cluster_16	NTSB3	DBLa0.1	CIDRa3.2	DBLd1	CIDRg1
#9_exvivo_cluster_80	NTSA1	DBLa1.1	CIDRa1.2	DBLb11	DBLg1	DBLe1	DBLg1	DBLz	DBLe1	DBLg1
#9_exvivo_cluster_66		DBLa0.15	CIDRa2.3
#9_exvivo_cluster_71	NTSB2	DBLa0	CIDRa4
#9_exvivo_cluster_76	NTSB7	DBLa0.6	CIDRa3.1	DBLb5	DBLg	DBLz	DBLe4
#9_exvivo_cluster_68	NTSB3	DBLa0.4	CIDRa6	DBLb5	DBLg10	DBLd
[truncated: 177 more columns]

## Sheet: #9_1st in vitro
	Total reads	Singletons
	1997	76
						Position D1	Position D1	Position D2	Position D2	Position D2	Position D2	Position D3	Position D3	Position D3	Position D3	Position D3	Position D4	Position D4	Position D4	Position D4	Position D4	Position D4	Position D4	Position D4	Position D5	Position D5	Position D5	Position D5	Position D5	Position D5	Position D5	Position D5	Position D6	Position D6	Position D6	Position D6	Position D6	Position D6	Position D6	Position D6	Domain 07	Domain 07	Domain 07	Domain 07	Domain 07	Domain 07	Domain 07	Domain 07	Domain 08
Sample_ID	Cluster_size	Blast_cluster_sequnece	Best Blast hit	E-value	# hits in varDB	NTSA	NTSB	DBLa0	DBLa1	DBLa2	DBLpam1	CIDRa1	CIDRa2-6	CIDRb	CIDRg	CIDRd	DBLb	DBLg	DBLd	DBLe	DBLz	CIDRb	CIDRg	CIDRd	DBLb	DBLg	DBLd	DBLe	DBLz	CIDRb	CIDRg	CIDRd	DBLb	DBLg	DBLd	DBLe	DBLz	CIDRb	CIDRg	CIDRd	DBLb	DBLg	DBLd	DBLe	DBLz	CIDRb	CIDRg	CIDRd	DBLb
#9_1st_invitro_cluster_88	436	GGGACATTGTCAGAGGAAAAGATCTTTTCCTTGGTCATCAAcaaagaaaaaaagaattagaagaaaatttgaaaaaaattttcaagaaaaTACATGGTGGATTGACAGATAGTGGTGCAAAAAATCACTACCAAGATGATAATGATGGAAATTTTTATCAATTAAGAGAAGATTGGTGGAATAATAATAGAATAATGGTATGGCGCGCGATAACATGCGGCGCTGCGGGTGGTAAATATTTTAGAAAAACATGTTCTAATGACACATCAGACACTAACGAAAAATGCCGATGTACCATTCATGGTGTTCCTACATATTTCGATTATGTGCCGCAGTATCTTCGG	DBLa0.9	6.37612e-104	2	0	0	0	0	0	0	0	0	0	0	0	0	0	0	0	0	0	0	0	0	0	0	0	0	0	0	0	0	0	0	0	0	0	0	0	0	0	0	0	0	0	0	0	0
#9_1st_invitro_cluster_18	308	TGATATCATACGAGGAAGAGATCTGTATCGTGGTAATGATAaagaaaatgataaattagaaaggaaattaaaaaaaattttcaagaaaatACATAGTGGATTGACGACGAAGAAGAGGAAGACGAAGACCTCGGCAAAAGAATACTACGAAGATAAGGATACTGACAAAAACTATTATAAATTAAGAGAAGATTGGTGGGACGCAAATCGCGCCACAGTATGGAAAGCTATCACGTGCGACGTTCATGGTTCTGACTATTTTCGACCAACATGTGGTGGTGATAAAGAAAACACTGCAACTCGGGTTAAAGACAAATGCCGGTGTGGCAACGGCGACGTAAGTATTGTCCCCACATATTTCGACTATGTGCCACAGTATCTTCGC	DBLa0.15	0	6	0	4	4	0	0	0	0	4	0	0	0	0	0	3	0	0	0	0	0	0	0	0	0	0	2	0	0	0	0	0	0	0	0	0	0	0	0	0	0	0	0	0	0	0
#9_1st_invitro_cluster_44	285	GTGATATCGTACGCGGCAAAGATCCATTTTATGGTAATCCAcaagaaaaagaaaaaagagaagacttagaaaagaatttgaaaaCAATTTTCAAGTAAATACATGAGGGATTGTCGAGGACGAATGGGAAGAATGGGGAGATAGAAACTCGCTACAAAGATGACGGTGATAAATTTTTTCAATAAAGGGAAGATTGGTGGACTGCAAATCGGCACACCGTGTGGAAAGCTATCACGTGCAGCGCTGGGAGTGGTAAATATTTTCGACGAACATGTGTTGGGGGAAATGAAACTGAAAGTAACTGCCGCTGTGACGACAAGCCAAATACCAATCCCCCAACCTATTTCGATTATGTGCCGCAGTTTCTTCGC	DBLa0.15	0	6	0	4	4	0	0	0	0	4	0	0	0	0	0	3	0	0	0	0	0	0	0	0	0	0	2	0	0	0	0	0	0	0	0	0	0	0	0	0	0	0	0	0	0	0
#9_1st_invitro_cluster_63	151	TGATATCGTACGCGGCAAAGATTTGTATCTCGGTGGTAATACCAAAGaaaaaaaaaCAAAGAGATGACTTAGAAAAGAATTTACAAAACATTTTCGCGAAAATATATGGAGAATTGATAAAGAAAAAGACGGAAGCAAAAGAACACTACGAAGATGGCGCTCCAGAGTTTTATAAATTAAGAGAAGATTGGTGGGCACTTAATAGACAAGATGTATGGAAAGCATTAACATGTGATGCAGGACAAGGTGCTCAATATGTTGGACTTACATGTTCTGAAGGACGAAGTTCGGCTCATCAAAAATGCACATGCGCTAATGGAGATGTCCCCACATATTTTGACTACGTGCCGCAGTATCTTCGG	DBLa0.6	0	3	0	2	2	0	0	0	0	2	0	0	0	0	0	2	0	0	0	0	0	0	0	0	0	0	2	0	0	0	0	0	0	0	0	0	0	0	0	0	0	0	0	0	0	0
#9_1st_invitro_cluster_37	148	TGATATCGTACGCGGCAAAGATTTGTATCTCGGTGGTAATACCAAAGaaaaaaaaCAAAGAGATGACTTAGAAAAGAATTTGAAAACAATTTTCAAGCAAATACATGAGGGATTGTCGAGGACGAATGGGAAGAATGGGGAGATAGAAACTCGCTACAAAGATGACGGTGATAAATTTTTTCAATTAAGGGAAGATTGGTGGACTGCAAATCGGCACACCGTGTGGAAAGCTATCACGTGCAGCGCTGGGAGTGGTAAATATTTTCGACGAACATGTGTTGGGGGAAATGAAACTGAAAGTAACTGCCGCTGTGACGACAAGCCAAATACCAATCCCCCAACCTATTTCGATTATGTGCCGCAGTTTCTTCGC	DBLa1.1	0	200	152	0	1	157	0	0	157	1	0	0	0	156	0	0	0	0	0	0	0	0	147	0	1	0	0	0	0	0	0	0	132	0	0	0	0	0	113	0	1	0	0	0	0	0
#9_1st_invitro_cluster_80	139	GTGATATTATACGAGGAAAAGATCTTTATATACGTAATAAAcaagaaaaagatagattagaaaagaatttgaaaaaaattttccagaaaaTATATGAAGGATTGACGACGACGAACGGCGCACAAGAACACTACCAAGATGAAAATGGTGGAAATTTTTTTAAATTACGAGAAGATTGGTGGAATATCAATAGAAAAAAAGTATGGGATGCTATCACATGTAACGCTTGGGGTAATACATATTTTCGAGGAACATGTTCTAATGACACAGCTTTGGCTAAAAATAACTGCCAATGTATTGACCAAACGGTTCCCACTAATTTTGATTATGTGCCGCAGTATCTTCGC	DBLa0.12	0	2	0	1	1	0	0	0	0	1	0	0	0	0	0	1	0	0	0	0	0	0	0	0	0	0	1	0	0	0	0	0	0	0	0	0	0	0	0	0	0	0	0	0	0	0
#9_1st_invitro_cluster_16 = cluster 14 ev	89	TGATATCGTACGCGGCAAAGATCTATTTCGTGGTAATAATGAAGaaaaaaaaaCAAAGAAAAGAATTAGACAAGAAGTTGAAAGAAATTTTCCAACAAATACATAGTGAAGTGACGTCTAGCGGGAGTAATTGGAAGGCTCTAAAAACACGCTACAAAGATGATGCCAAAAAATATTATTCTAAATTACGAGAAGATTGGTGGAACGCGAATCGGCACACCGTGTGGGAAGCTATCACGTGTGAAGTTAAGAGTGGTTCTGACTATTTTCGACCAACATGTGGTAATAGTGGAAGTCCATCTATGGCTAGAGACAAATGCCGGTGTGGCAACGGCGACGTAAGTATTGTCCCCACATATTTTGACTACGTGCCGCAGTATCTTCGG	DBLa0.5	0	3	0	2	2	0	0	0	0	2	0	0	0	0	0	2	0	0	0	0	0	0	0	0	0	0	1	0	0	0	0	0	1	0	0	0	0	0	0	0	0	0	0	0	0	0
#9_1st_invitro_cluster_68	61	AGACATAATACGAGGAAGAGATTTGTATGGTGGTAATGATAAGAGAAGACAACAATTAGAAGAGAATTTAAGAAAAATTTTCGCGAATATATATGAAGAATTGTCGAGGACGCCGACGAAGAATGGGCAGAAGTCTGCAAAAGGACACTACGGAAGTGATGCTCCAAATTTTTATAAATTACGAGAAGATTGGTGGAATAATAATAGAATAATGGTATGGTACGCGATAACATGCGGCGTTAAGGGTAATAAATATTTTCGACAAACATGTGGTTCAGGAGAATGGACTAAAGACAATTGCCGATGTACCATTCATGGTGTTCCCACATATTTCGACTATGTGCCACAGTATCTTCGCT	DBLa0.9	8.40941e-118	3	0	2	2	0	0	0	0	2	0	0	0	0	2	0	0	0	0	0	0	0	0	1	0	0	0	0	0	0	0	0	0	0	0	1	0	0	0	0	1	0	0	0	0	0
#9_1st_invitro_cluster_0=cluster 0 ev	47	TGACATTATACGAGGAAAAGATCTTTATCTCGGTGATAATATaaaagatagagaacaaaaacaaaaattacaagaaaatttgaaaacaattttcgggaaaaTATATGATGAAGTGACGAGAGGGAAGACGAATGGGAAGAAGGAGGAGATAGAAACTCGCTACAAAAAAGATGATGAGGATGGAAATTTTTTTCAATTACGAGAAGATTGGTGGGCACTTAACAGAGATCAAGTATGGCAAGCCATCACATGCAAAGCGAACGGTACATACTTTCGTCCAACATGCGGTGATAGTGATAGTCCATCTCAAGCTCAAAAACAATGCCGGTGTGACGACGACAAGCCAAAGAGCGCAAAGCCCGGCAAGGCAAATGACAACGTAAATATTGTTCCCACCTA…	DBLa0.11	0	6	0	4	4	0	0	0	0	4	0	0	0	0	0	4	0	0	0	0	0	0	0	0	0	0	1	3	0	0	0	0	0	1	0	0	0	0	0	0	1	0	0	0	0	0
#9_1st_invitro_cluster_9 = cluster 9 ev	44	TGATATCGTACGCGGCAAAGATCTTTTCCTTGGTAATCCAGAAGAAATAAAACAAAGACAACAATTAGACAAGAAGTTGAAAGATATTTTCACGCAAATATATAATGAGGTGACGAATGGGAAGAAGTCGGAGCTACAAGCTCGCTACGATGGTGACGGTCCAAATTTTTTTAAATTACGAGAAGATTGGTGGAACGCGAATCGGCACACCGTGTGGAAAGCCATCACGTGCGGCACACATAAGGGTGATACATATTTTCGAACAACGTGCATTGATCTTAATGGAAGTGGAGCCCAAGCTAATAACTACTGCCGGTGTAACGGCGACCAGCCAAATGACGACAAGCCAAATATCGATCCCCCAACCTATTTAGATTATGTGCCGCAGTTTCTTCGC	DBLa0.15	0	6	0	4	4	0	0	0	0	4	0	0	0	0	0	3	0	0	0	0	0	0	0	0	0	0	2	0	0	0	0	0	0	0	0	0	0	0	0	0	0	0	0	0	0	0
#9_1st_invitro_cluster_20	30	GAGATATTATACGAGGAAAAGATTTGTATCGTCGAGATAAAGGAAAAAGAGATAAATTAGAAGATAAGTTGAAAGAGGTTTTTGGGAAAATATATAATGAGTTGACGTCGACGAATGGTGTAAAATCTCGCTACAATGGTGATGAAGCCAATAATTATTATCAATTACGAGAAGATTGGTGGGCACTTAACAGAGACCAAGTCTGGAAAGCCATCACGTGCGGCGCGGACGCTGGTAATAAATATTTTCGACAAACATGTGGTAGTGGAAAAACTGCAATTCGGACTCCTAGTCAATGCCGGTGTGGCGACGGCAAAAAGACCGGCACAAATGAGACCGACCAAGTCCCCACATATTTCGACTATGTGCCACAGTATCTTCGC	DBLa0.1	0	3	0	1	1	0	0	0	0	1	0	0	0	0	0	1	0	0	0	0	0	0	0	0	0	0	0	1	0	0	0	0	0	0	0	0	0	0	0	0	0	0	0	0	0	0
#9_1st_invitro_cluster_72	26	TGATATCGTACGCGGTAAAGATCTGTATCGTCGTGATAATAAAAAAGATAAATTAGAAAAGAATTTACAAAACATTTTCAAGCAAATACATGAAGGATTGACGACGACGAATAAAGAGGCAGCACAAAAACGCTACAATGTTGATAAAGATCCAAATTATTATCAATTGCGAGAAGATTGGTGGGCACTTAATAGAAACGATGTATGGAAAGCTATCACGTGCGAAGCTGGGGGTGGTACATATTTTCGAAAAACATGTGATGGTGGAGAAAATCCAACTGCGACTCAAGGTAACTGCAAATGCATTAATGGAGATGTCCCCACATATTTTGACTATGTGCCGCAGTATCTTCGC	DBLa0.15	0	6	0	4	4	0	0	0	0	4	0	0	0	0	0	3	0	0	0	0	0	0	0	0	0	0	2	0	0	0	0	0	0	0	0	0	0	0	0	0	0	0	0	0	0	0
#9_1st_invitro_cluster_96= cluster 80 ev	23	GTGATATTGTAAGAGGAATAGATATGTTTAAACCAAATGTCCATGACAAAGTAGAAAAGGGTCTCCGAGAGGTTTTCAAGAAAATACATGATGAAATGGAAGGTGAGGTAAAAAATGATTACAATCCTGATGGATCTGGAAATTATTATAAATTAAGAGAAGCATGGTGGGATGTGAATAGAAATAAAGTATGGCAAGCCATAACCTGTGGCGCACTACCTAAATCTGCATATTTCTTGCAATCAGAAGATAATAAACAATTATTTTTATATCCTAAATGCGGCCATAATAATAAGAATGATCTTCCTACCAATTTAGATTATGTTCCTCAATATTTACGT	DBLa1.1	0	200	152	0	1	157	0	0	157	1	0	0	0	156	0	0	0	0	0	0	0	0	147	0	1	0	0	0	0	0	0	0	132	0	0	0	0	0	113	0	1	0	0	0	0	0
#9_1st_invitro_cluster_28	17	TGATATCATACGAGGAAGAGATCTGTATCGTGGTAATGATAAAGAAAATGATAAATTAGAAAGGAAATTaaaaaaaaaTTTTCAAGAAAATACATAGTGGATTGACGACGAAGAAGAGGAAGACGAAGACCTCGGCAAAAGAATACTACGAAGATAAGGATACTGACAAAAACTATTATAAATTAAGAGAAGATTGGTGGGACGCAAATCGCGCCACAGTATGGAAAGCTATCACGTGCGACGTTCATGGTTCTGACTATTTTCGACCAACATGTGGTGGTGATAAAGAAAACACTGCAACTCGGGTTAAAGACAAATGCCGGTGTGGCACCGACCAGGTCCCCACATATTTTGACTACGTGCCACAGTTTCTTCGC	DBLa0.15	0	6	0	4	4	0	0	0	0	4	0	0	0	0	0	3	0	0	0	0	0	0	0	0	0	0	2	0	0	0	0	0	0	0	0	0	0	0	0	0	0	0	0	0	0	0
					# hits in varDB	NTSA	NTSB	DBLa0	DBLa1	DBLa2	DBLpam1	CIDRa1	CIDRa2-6	CIDRb	CIDRg	CIDRd	DBLb	DBLg	DBLd	DBLe	DBLz	CIDRb	CIDRg	CIDRd	DBLb	DBLg	DBLd	DBLe	DBLz	CIDRb	CIDRg	CIDRd	DBLb	DBLg	DBLd	DBLe	DBLz	CIDRb	CIDRg	CIDRd	DBLb	DBLg	DBLd	DBLe	DBLz	CIDRb	CIDRg	CIDRd	DBLb
				Sample_total:	452	304	32	34	314	0	0	314	34	0	0	0	312	2	25	0	0	0	0	0	0	294	1	2	0	15	4	0	0	0	0	265	1	0	1	0	0	226	0	4	0	0	0	0	0
Interpreded Results				Position D1	Position D1	Position D2	Position D2	Position D2	Position D2	Position D3	Position D3	Position D3	Position D3	Position D3	Position D3	Position D4	Position D4	Position D4	Position D4	Position D4	Position D4	Position D4	Position D4	Position D5	Position D5	Position D5	Position D5	Position D5	Position D5	Position D5	Position D5	Position D6	Position D6	Position D6	Position D6	Position D6	Position D6	Position D6	Position D6	Domain 07	Domain 07	Domain 07	Domain 07	Domain 07	Domain 07	Domain 07	Domain 07	Domain 08	Domain 08
Sample_ID	Cluster_size			NTSA	NTSB	DBLa0	DBLa1	DBLa2	DBLpam1	CIDRa1	CIDRa2-6	CIDRb	CIDRg	CIDRd	CIDRa1.2-3	DBLb	DBLg	DBLd	DBLe	DBLz	CIDRb	CIDRg	CIDRd	DBLb	DBLg	DBLd	DBLe	DBLz	CIDRb	CIDRg	CIDRd	DBLb	DBLg	DBLd	DBLe	DBLz	CIDRb	CIDRg	CIDRd	DBLb	DBLg	DBLd	DBLe	DBLz	CIDRb	CIDRg	CIDRd	DBLb	DBLg
#9_1st_invitro_cluster_88	436
#9_1st_invitro_cluster_18	308			0	1	1	0	0	0	0	1	0	0	0		0	0	1	0	0	0	0	0	0	0	0	0	0	1	0	0	0	0	0	0	0	0	0	0	0	0	0	0	0	0	0	0	0	0
#9_1st_invitro_cluster_44	285			0	1	1	0	0	0	0	1	0	0	0		0	0	1	0	0	0	0	0	0	0	0	0	0	1	0	0	0	0	0	0	0	0	0	0	0	0	0	0	0	0	0	0	0	0
#9_1st_invitro_cluster_63	151			0	1	1	0	0	0	0	1	0	0	0		0	0	1	0	0	0	0	0	0	0	0	0	0	1	0	0	0	0	0	0	0	0	0	0	0	0	0	0	0	0	0	0	0	0
#9_1st_invitro_cluster_37	148			1	0	0	1	0	0	0		0	0	0	1	1	0	0	0	0	0	0	0	0	1	0	0	0	0	0	0	0	0	0	1	0	0	0	0	0	1	0	0	0	0	0	0	0	0
#9_1st_invitro_cluster_80	139			0	1	1	0	0	0	0	1	0	0	0		0	0	1	0	0	0	0	0	0	0	0	0	0	1	0	0	0	0	0	0	0	0	0	0	0	0	0	0	0	0	0	0	0	0
#9_1st_invitro_cluster_16 = cluster 14 ev	89			0	1	1	0	0	0	0	1	0	0	0		0	0	1	0	0	0	0	0	0	0	0	0	0	1	0	0	0	0	0	1	0	0	0	0	0	0	0	0	0	0	0	0	0	0
#9_1st_invitro_cluster_68	61			0	1	1	0	0	0	0	1	0	0	0		0	1	0	0	0	0	0	0	0	0	1	0	0	0	0	0	0	0	0	0	0	0	1	0	0	0	0	1	0	0	0	0	0	0
#9_1st_invitro_cluster_0=cluster 0 ev	47			0	1	1	0	0	0	0	1	0	0	0		0	0	1	0	0	0	0	0	0	0	0	0	0	0	1	0	0	0	0	0	1	0	0	0	0	0	0	1	0	0	0	0	0	0
#9_1st_invitro_cluster_9 = cluster 9 ev	44			0	1	1	0	0	0	0	1	0	0	0		0	0	1	0	0	0	0	0	0	0	0	0	0	1	0	0	0	0	0	0	0	0	0	0	0	0	0	0	0	0	0	0	0	0
#9_1st_invitro_cluster_20	30			0	1	1	0	0	0	0	1	0	0	0		0	0	1	0	0	0	0	0	0	0	0	0	0	0	1	0	0	0	0	0	0	0	0	0	0	0	0	0	0	0	0	0	0	0
#9_1st_invitro_cluster_72	26			0	1	1	0	0	0	0	1	0	0	0		0	0	1	0	0	0	0	0	0	0	0	0	0	1	0	0	0	0	0	0	0	0	0	0	0	0	0	0	0	0	0	0	0	0
#9_1st_invitro_cluster_96= cluster 80 ev	23			1	0	0	1	0	0	0		0	0	0	1	1	0	0	0	0	0	0	0	0	1	0	0	0	0	0	0	0	0	0	1	0	0	0	0	0	1	0	0	0	0	0	0	0	0
#9_1st_invitro_cluster_28	17			0	1	1	0	0	0	0	1	0	0	0		0	0	1	0	0	0	0	0	0	0	0	0	0	1	0	0	0	0	0	0	0	0	0	0	0	0	0	0	0	0	0	0	0	0
			Hit Rate:	0.0947894	0.663525	0.663525	0.0947894	0	0	0	0.663525	0	0	0	0.0947894	0.0947894	0.0338137	0.629712	0	0	0	0	0	0	0.0947894	0.0338137	0	0	0.587029	0.0426829	0	0	0	0	0.144124	0.0260532	0	0.0338137	0	0	0.0947894	0	0.059867	0	0	0	0	0	0
Suggested Composition
Sample_ID
#9_1st_invitro_cluster_88
#9_1st_invitro_cluster_18	NTSB	DBLa0	CIDRa2.5	DBLd1	CIDRb1
#9_1st_invitro_cluster_44	NTSB	DBLa0	CIDRa2.5	DBLd1	CIDRb1
#9_1st_invitro_cluster_63	NTSB	DBLa0.6	CIDRa3.2	DBLd1	CIDRb6
#9_1st_invitro_cluster_37	NTSA1	DBLa1.1	CIDRa1.2	DBLb11	DBLg1	DBLe1	DBLg1	DBLz	DBLe1	DBLg1
#9_1st_invitro_cluster_80	NTSB7	DBLa0.12	CIDRa4	DBLd1	CIDRb5
#9_1st_invitro_cluster_16 = cluster 14 ev	NTSB3	DBLa0.5	CIDRa2.3	DBLd1	CIDRb1	DBLe4
#9_1st_invitro_cluster_68	NTSB3	DBLa0.9	CIDRa2.7	DBLg13	DBLd1	CIDRg2	DBLe2	DBLe2	DBLe2
#9_1st_invitro_cluster_0=cluster 0 ev	NTSB3	DBLa0.11	CIDRa2.4	DBLd1		DBLz6	DBLe9
#9_1st_invitro_cluster_9 = cluster 9 ev	NTSB	DBLa0	CIDRa2.5	DBLd1	CIDRb1
#9_1st_invitro_cluster_20	NTSB3	DBLa0.1	CIDRa3.2	DBLd1	CIDRg1
#9_1st_invitro_cluster_72	NTSB	DBLa0	CIDRa2.5	DBLd1	CIDRb1
#9_1st_invitro_cluster_96= cluster 80 ev	NTSA1	DBLa1.1	CIDRa1.2	DBLb11	DBLg1	DBLe1	DBLg1	DBLz	DBLe1	DBLg1
#9_1st_invitro_cluster_28	NTSB	DBLa0	CIDRa2.5	DBLd1	CIDRb1
[truncated: 177 more columns]

## Sheet: #9_2nd in vitro
	Total reads	Singletons
	2149	91
						Position D1	Position D1	Position D2	Position D2	Position D2	Position D2	Position D3	Position D3	Position D3	Position D3	Position D3	Position D4	Position D4	Position D4	Position D4	Position D4	Position D4	Position D4	Position D4	Position D5	Position D5	Position D5	Position D5	Position D5	Position D5	Position D5	Position D5	Position D6	Position D6	Position D6	Position D6	Position D6	Position D6	Position D6	Position D6	Domain 07	Domain 07	Domain 07	Domain 07	Domain 07	Domain 07	Domain 07	Domain 07	Domain 08
Sample_ID	Cluster_size	Blast_cluster_sequnece	Best Blast hit	E-value	# hits in varDB	NTSA	NTSB	DBLa0	DBLa1	DBLa2	DBLpam1	CIDRa1	CIDRa2-6	CIDRb	CIDRg	CIDRd	DBLb	DBLg	DBLd	DBLe	DBLz	CIDRb	CIDRg	CIDRd	DBLb	DBLg	DBLd	DBLe	DBLz	CIDRb	CIDRg	CIDRd	DBLb	DBLg	DBLd	DBLe	DBLz	CIDRb	CIDRg	CIDRd	DBLb	DBLg	DBLd	DBLe	DBLz	CIDRb	CIDRg	CIDRd	DBLb
#9_2nd_invitro_cluster_99	477	GGACATTGTCAGAGGAAAAGATCTTTTCCTTGGTCATCAACaaagaaaaaaagaattagaagaaaatttgaaaaaaattttcaagaaaaTACATGGTGGATTGACAGATAGTGGTGCAAAAAAATCACTACCAAGATGATAATGATGGAAATTTTTATCAATTAAGAGAAGATTGGTGGAATAATAATAGAATAATGGTATGGCGCGCGATAACATGCGGCGCTGCGGGTGGTAAATATTTTAGAAAAACATGTTCTAATGACACATCAGACACTAACGAAAAATGCCGATGTACCATTCATGGTGTTCCTACATATTTCGATTATGTGCCGCAGTATCTTCGG	DBLa0.9	8.18988e-108	2	0	0	0	0	0	0	0	0	0	0	0	0	0	0	0	0	0	0	0	0	0	0	0	0	0	0	0	0	0	0	0	0	0	0	0	0	0	0	0	0	0	0	0	0
#9_2nd_invitro_cluster_52	358	TGATATCGTACGCGGCAAAGATCCATTTTATGGTAATCCACaagaaaaagaaaaaagagaagacttagaaaagaatttgaaaaCAATTTTCAAGCAAATACATGAGGGATTGTCGAGGACGAATGGGAAGAATGGGGAGATAGAAACTCGCTACAAAGATGACGGTGATAAATTTTTTTCAATTAAGGGAAGATTGGTGGACTGCAAATCGGCACACCGTGTGGAAAGCTATCACGTGCAGCGCTGGGAGTGGTAAATATTTTCGACGAACATGTGTTGGGGGAAATGAAACTGAAAGTAACTGCCGCTGTGACGACAAGCCAAATACCAATCCCCCAACCTATTTCGATTATGTGCCGCAGTTTCTTCAC	DBLa0.9	8.18988e-108	2	0	0	0	0	0	0	0	0	0	0	0	0	0	0	0	0	0	0	0	0	0	0	0	0	0	0	0	0	0	0	0	0	0	0	0	0	0	0	0	0	0	0	0	0
#9_2nd_invitro_cluster_39	315	TGATATCATACGAGGAAGAGATCTGTATCGTGGTAATGATAAAGAAAATAATAAATTAGAAAGGAAATTaaaaaaaaaaTTTTCAAGAAAATACATAGTGGATTGACGACGAAGAAGAGGAAGACGAAGACCTCGGCAAAAGAATACTACGAAGATAAGGATACTGACAAAAACTATTATAAATTAAGAGAAGATTGGTGGGACGCAAATCGCGCCACAGTATGGAAAGCTATCACGTGCGACGTTCATGGTTCTGACTATTTTCGACCAACATGTGGTGGTGATAAAGAAAACACTGCAACTCGGGTTAAAGACAAATGCCGGTGTGGCAACGACCAAGTCCCCACATATTTCGACTATGTGCCACAGTATCTTCGC	DBLa0.15	0	3	0	2	2	0	0	0	0	2	0	0	0	0	0	1	0	0	0	0	0	0	0	0	0	0	1	0	0	0	0	0	0	0	0	0	0	0	0	0	0	0	0	0	0	0
#9_2nd_invitro_cluster_73	177	GTGATATCGTACGCGGCAAAGATTTGTATCTCGGTGGTAATACcaaagaaaaaaaacaaagagatgacttagaaaagaatttacaaaacattttcgcgaaaaTATATGGAGAATTGATAAAGAAAAAGACGGAAGCAAAAGAACACTACGAAGATGGCGCTCCAGAGTTTTATAAATTAAGAGAAGATTGGTGGGCACTTAATAGACAAGATGTATGGAAAGCATTAACATGTGATGCAGGACAAGGTGCTCAATATGTTGGACTTACATGTTCTGAAGGACGAAGTTCGGCTCATCAAAAATGCACATGCGCTAATGGAGATGTCCCCACATATTTTGATTATGTGCCGCAGTTTCTTCGC	DBLa0.6	0	3	0	2	2	0	0	0	0	2	0	0	0	0	0	2	0	0	0	0	0	0	0	0	0	0	2	0	0	0	0	0	0	0	0	0	0	0	0	0	0	0	0	0	0	0
#9_2nd_invitro_cluster_92	91	TGATATTATACGAGGAAAAGATCTTTATATTCGTAATAAACAagaaaaagatagattagaaaagaatttgaaaaaaaattttccagaaaaTATATGAAGGATTGACGACGACGAACGGCGCACAAGAACACTACCAAGATGAAAATGGTGGAAATTTTTTTAAATTACGAGAAGATTGGTGGAATATCAATAGAAAAAAAGTATGGGATGCTATCACATGTAACGCTTGGGGTAATACATATTTTCGAGGAACATGTTCTAATGACACAGCTTTGGCTAAAAATAACTGCCAATGTATTGACCAAACGGTTCCCACTAATTTTGATTATGTGCCGCAGTATCTTCGC	DBLa0.12	0	2	0	1	1	0	0	0	0	1	0	0	0	0	0	1	0	0	0	0	0	0	0	0	0	0	1	0	0	0	0	0	0	0	0	0	0	0	0	0	0	0	0	0	0	0
#9_2nd_invitro_cluster_106 = cluster 96 1st	88	GTGATATTGTAAGAGGAATAGATATGTTTAAACCAAATGTCCATGACAAAGTAGAAAAGGGTCTCCGAGAGGTTTTCAAGAAAATACATGATGAAATGGAAGGTGAGGTAAAAAATGATTACAATCCTGATGGATCTGGAAATTATTATAAATTAAGAGAAGCATGGTGGGATGTGAATAGAAATAAAGTATGGCAAGCCATAACCTGTGGCGCACTACCTAAATCTGCATATTTCTTGCAATCAGAAGATAATAAACAATTATTTTTATATCCTAAATGCGGCCATAATAATAAGAATGATCTTCCTACCAATTTAGATTATGTTCCTCAATATTTACGT	DBLa1.1	0	200	152	0	1	157	0	0	157	1	0	0	0	156	0	0	0	0	0	0	0	0	147	0	1	0	0	0	0	0	0	0	132	0	0	0	0	0	113	0	1	0	0	0	0	0
#9_2nd_invitro_cluster_78	88	GAGACATAATACGAGGAAGAGATTTGTATGGTGGTAATAATAAGAGAAGACAACAATTAGAAGAGAATTTAAGAAAAATTTTCGCGAATATATATGAAGAATTGTCGAGGACGCCGACGAAGAATGGGCAGAAGTCTGCAAAAGGACACTACGGAAGTGATGCTCCAAATTTTTATAAATTACGAGAAGATTGGTGGAATAATAATAGAATAATGGTATGGTACGCGATAACATGCGGCGTTAAGGGTAATAAATATTTTCGACAAACATGTGGTTCAGGAGAATGGACTAAAGACAATTGCCGATGTACCATTCATGGTGTTCCCACATATTTTGACTACGTGCCGCAGTATCTTCGG	DBLa0.9	3.88494e-121	3	0	2	2	0	0	0	0	2	0	0	0	0	2	0	0	0	0	0	0	0	0	1	0	0	0	0	0	0	0	0	0	0	0	1	0	0	0	0	1	0	0	0	0	0
#9_2nd_invitro_cluster_15 =cluster 9 ev	84	TGATATCGTACGCGGCAAAGATCTTTTCCTTGGTAATCCAGAAGAAATAAAACAAAGACAACAATTAGACAAGAAGTTGAAAGATATTTTCACGCAAATATATAATGAGGTGACGAATGGGAAGAAGTCGGAGCTACAAGCTCGCTACGATGGTGACGGTCCAAATTTTTTTAAATTACGAGAAGATTGGTGGAACGCGAATCGGCACACCGTGTGGAAAGCCATCACGTGCGGCACACATAAGGGTGATACATATTTTCGAACAACGTGCATTGATCTTAATGGAAGTGGAGCCCAAGCTAATAACTACTGCCGGTGTAACGGCGACCAGCCAAATGACGACAAGCCAAATATCGATCCCCCAACCTATTTAGATTATGTGCCGCAGTTTCTTCGC	DBLa0.5	0	3	0	2	2	0	0	0	0	2	0	0	0	0	0	2	0	0	0	0	0	0	0	0	0	0	1	0	0	0	0	0	1	0	0	0	0	0	0	0	0	0	0	0	0	0
#9_2nd_invitro_cluster_0=cluster 0 1st	81	GTGACATTATACGAGGAAAAGATCTTTATCTCGGTGATAATATaaaagatagagaacaaaaacaaaaattacaagaaaatttgaaaacaattttcgggaaaaTATATGATGAAGTGACGAGAGGGAAGACGAATGGGAAGAAGGAGGAGATAGAAACTCGCTACAAAAAAGATGATGAGGATGGAAATTTTTTTCAATTACGAGAAGATTGGTGGGCACTTAACAGAGATCAAGTATGGCAAGCCATCACATGCAAAGCGAACGGTACATACTTTCGTCCAACATGCGGTGATAGTGATAGTCCATCTCAAGCTCAAAAACAATGCCGGTGTGACGACGACAAGCCAAAGAGCGCAAAGCCCGGCAAGGCAAATGACAACGTAAATATTGTTCCCACCT…	DBLa0.11	0	6	0	4	4	0	0	0	0	4	0	0	0	0	0	4	0	0	0	0	0	0	0	0	0	0	1	3	0	0	0	0	0	1	0	0	0	0	0	0	1	0	0	0	0	0
#9_2nd_invitro_cluster_24	60	TGATATCGTACGCGGCAAAGATCTATTTCGTGGTAATAATGAAGaaaaaaaaaCAAAGAAAAGAATTAGACAAGAAGTTGAAAGAAATTTTCCAACAAATACATAGTGAAGTGACGTCTAGCGGGAGTAATTGGAAGGCTCTAAAAACACGCTACAAAGATGATGCCAAAAAATATTATTCTAAATTACGAGAAGATTGGTGGAACGCGAATCGGCACACCGTGTGGGAAGCTATCACGTGTGAAGTTAAGAGTGGTTCTGACTATTTTCGACCAACATGTGGTAATAGTGGAAGTCCATCTATGGCTAGAGACAAATGCCGGTGTGGCAACGGCGACGTAAGTATTGTCCCCACATATTTTGACTACGTGCCACAGTTTCTTCGC	DBLa0.5	0	3	0	2	2	0	0	0	0	2	0	0	0	0	0	2	0	0	0	0	0	0	0	0	0	0	1	0	0	0	0	0	1	0	0	0	0	0	0	0	0	0	0	0	0	0
#9_2nd_invitro_cluster_82 = cluster 72 1st	31	TGATATCGTACGCGGTAAAGATCTGTATCGTCGTGATAATAAAAAAGATAAATTAGAAAAGAATTTACAAAACATTTTCAAGCAAATACATGAAGGATTGACGACGACGAATAAAGAGGCAGCACAAAAACGCTACAATGTTGATAAAGATCCAAATTATTATCAATTGCGAGAAGATTGGTGGGCACTTAATAGAAACGATGTATGGAAAGCTATCACGTGCGAAGCTGGGGGTGGTACATATTTTCGAAAAACATGTGATGGTGGAGAAAATCCAACTGCGACTCAAGGTAACTGCAAATGCATTAATGGAGATGTCCCCACATATTTTGACTATGTGCCGCAGTATCTTCGC	DBLa0.5	0	3	0	2	2	0	0	0	0	2	0	0	0	0	0	2	0	0	0	0	0	0	0	0	0	0	1	0	0	0	0	0	1	0	0	0	0	0	0	0	0	0	0	0	0	0
#9_2nd_invitro_cluster_27	30	GAGATATTATACGAGGAAAAGATTTGTATCGTCGAGATAAAGGAAAAAGAGATAAATTAGAAGATAAGTTGAAAGAGGTTTTTGGGAAAATATATAATGAATTGACGTCGACGAATGGTGTAAAATCTCGCTACAATGGTGATGAAGCCAATAATTATTATCAATTACGAGAAGATTGGTGGGCACTTAACAGAGACCAAGTCTGGAAAGCCATCATGTGCGGCGCGGACGCTGGTAATAAATATTTTCGACAAACATGTGGTAGTGGAAAAACTGCAATTCGGACTCCTAGTCAATGCCGGTGTGGCGACGGCAAAAAGACCGGCACAAATGAGACCGACCAGGTCCCCACATATTTTGACTACGTGCCACAGTTTCTTCGC	DBLa0.1	0	3	0	1	1	0	0	0	0	1	0	0	0	0	0	1	0	0	0	0	0	0	0	0	0	0	0	1	0	0	0	0	0	0	0	0	0	0	0	0	0	0	0	0	0	0
#9_2nd_invitro_cluster_110	21	TGATATTATACGAGGAAAAGATCTTTATCGTGGAAATAAACAAGAAAAAGATGCATTACAAGAGCAATTAAAGAAATATTTCAAGGAGCTTCATAATCATTTAAAGCAGCAAGAAAAAAATTACTATGAAGATAGAAATGGAAATTATTATCTATTAAGAGAAGATTGGTGGGCACTTAATAGAAAAGATGTTTGGAAAGCATTAACATGTGAAGCATACGGTACATATTTTCGACACACATGTAATGGACAAAATCCAACTCAGACTGAAGATAACTGCCAATGTATCAATGGTGATGTCCCCACATATTTTGACTACGTCCCTCAACATTTACGT	DBLa0.6	5.6632e-174	1	0	1	1	0	0	0	0	1	0	0	0	0	0	0	0	0	0	0	0	0	0	0	0	0	0	0	0	0	0	0	0	0	0	0	0	0	0	0	0	0	0	0	0	0
#9_2nd_invitro_cluster_61	11	GTGATATTATACGAGGAAAAGATCTGTATCTCGGTTATGATcaaaaagaaaaagaccgaagacgaaaattagaagagaaattgaaagaaattttcaagaaaaTACATAGTGAAGTGACGAGCGGCAATAATAAGGATACGCTACAAAAACGCTACGAAGGTGATACTGCAGATTTTTTAAAATTACGAGAAGATTGGTGGGAAGCTAATAGACAAGAAGTATGGAAAGCTATCACATGTCATGCAGGACAAAGTGATAAATATTTTCGACAAACATGTTCTGATGACACAGCAGACACTCATGAAAAATGCCGGTGTAAGGGCGACCAAGTCCCCACATATTTTGACTATGTGCCGCAGTATCTTCGG	DBLa0.16	0	2	0	0	1	0	0	0	0	1	0	0	0	0	0	1	0	0	0	0	0	0	0	0	0	0	1	0	0	0	0	0	0	0	0	0	0	0	0	0	0	0	0	0	0	0
					# hits in varDB	NTSA	NTSB	DBLa0	DBLa1	DBLa2	DBLpam1	CIDRa1	CIDRa2-6	CIDRb	CIDRg	CIDRd	DBLb	DBLg	DBLd	DBLe	DBLz	CIDRb	CIDRg	CIDRd	DBLb	DBLg	DBLd	DBLe	DBLz	CIDRb	CIDRg	CIDRd	DBLb	DBLg	DBLd	DBLe	DBLz	CIDRb	CIDRg	CIDRd	DBLb	DBLg	DBLd	DBLe	DBLz	CIDRb	CIDRg	CIDRd	DBLb
				Sample_total:	236	152	19	21	157	0	0	157	21	0	0	0	156	2	16	0	0	0	0	0	0	147	1	1	0	9	4	0	0	0	0	135	1	0	1	0	0	113	0	3	0	0	0	0	0
Interpreded Results				Position D1	Position D1	Position D2	Position D2	Position D2	Position D2	Position D3	Position D3	Position D3	Position D3	Position D3	Position D3	Position D4	Position D4	Position D4	Position D4	Position D4	Position D4	Position D4	Position D4	Position D5	Position D5	Position D5	Position D5	Position D5	Position D5	Position D5	Position D5	Position D6	Position D6	Position D6	Position D6	Position D6	Position D6	Position D6	Position D6	Domain 07	Domain 07	Domain 07	Domain 07	Domain 07	Domain 07	Domain 07	Domain 07	Domain 08	Domain 08
Sample_ID	Cluster_size			NTSA	NTSB	DBLa0	DBLa1	DBLa2	DBLpam1	CIDRa1	CIDRa2-6	CIDRb	CIDRg	CIDRd	CIDRa1.2-3	DBLb	DBLg	DBLd	DBLe	DBLz	CIDRb	CIDRg	CIDRd	DBLb	DBLg	DBLd	DBLe	DBLz	CIDRb	CIDRg	CIDRd	DBLb	DBLg	DBLd	DBLe	DBLz	CIDRb	CIDRg	CIDRd	DBLb	DBLg	DBLd	DBLe	DBLz	CIDRb	CIDRg	CIDRd	DBLb	DBLg
#9_2nd_invitro_cluster_99	477
#9_2nd_invitro_cluster_52	358
#9_2nd_invitro_cluster_39	315			0	1	1	0	0	0	0	1	0	0	0		0	0	1	0	0	0	0	0	0	0	0	0	0	1	0	0	0	0	0	0	0	0	0	0	0	0	0	0	0	0	0	0	0	0
#9_2nd_invitro_cluster_73	177			0	1	1	0	0	0	0	1	0	0	0		0	0	1	0	0	0	0	0	0	0	0	0	0	1	0	0	0	0	0	0	0	0	0	0	0	0	0	0	0	0	0	0	0	0
#9_2nd_invitro_cluster_92	91			0	1	1	0	0	0	0	1	0	0	0		0	0	1	0	0	0	0	0	0	0	0	0	0	1	0	0	0	0	0	0	0	0	0	0	0	0	0	0	0	0	0	0	0	0
#9_2nd_invitro_cluster_106 = cluster 96 1st	88			1	0	0	1	0	0	0		0	0	0	1	1	0	0	0	0	0	0	0	0	1	0	0	0	0	0	0	0	0	0	1	0	0	0	0	0	1	0	0	0	0	0	0	0	0
#9_2nd_invitro_cluster_78	88			0	1	1	0	0	0	0	1	0	0	0		0	1	0	0	0	0	0	0	0	0	1	0	0	0	0	0	0	0	0	0	0	0	1	0	0	0	0	1	0	0	0	0	0	0
#9_2nd_invitro_cluster_15 =cluster 9 ev	84			0	1	1	0	0	0	0	1	0	0	0		0	0	1	0	0	0	0	0	0	0	0	0	0	1	0	0	0	0	0	1	0	0	0	0	0	0	0	0	0	0	0	0	0	0
#9_2nd_invitro_cluster_0=cluster 0 1st	81			0	1	1	0	0	0	0	1	0	0	0		0	0	1	0	0	0	0	0	0	0	0	0	0	0	1	0	0	0	0	0	1	0	0	0	0	0	0	1	0	0	0	0	0	0
#9_2nd_invitro_cluster_24	60			0	1	1	0	0	0	0	1	0	0	0		0	0	1	0	0	0	0	0	0	0	0	0	0	1	0	0	0	0	0	1	0	0	0	0	0	0	0	0	0	0	0	0	0	0
#9_2nd_invitro_cluster_82 = cluster 72 1st	31			0	1	1	0	0	0	0	1	0	0	0		0	0	1	0	0	0	0	0	0	0	0	0	0	1	0	0	0	0	0	1	0	0	0	0	0	0	0	0	0	0	0	0	0	0
#9_2nd_invitro_cluster_27	30			0	1	1	0	0	0	0	1	0	0	0		0	0	1	0	0	0	0	0	0	0	0	0	0	0	1	0	0	0	0	0	0	0	0	0	0	0	0	0	0	0	0	0	0	0
#9_2nd_invitro_cluster_110	21			0	1	1	0	0	0	0	1	0	0	0		0	0	0	0	0	0	0	0	0	0	0	0	0	0	0	0	0	0	0	0	0	0	0	0	0	0	0	0	0	0	0	0	0	0
#9_2nd_invitro_cluster_61	11			0	0	1	0	0	0	0	1	0	0	0		0	0	1	0	0	0	0	0	0	0	0	0	0	1	0	0	0	0	0	0	0	0	0	0
			Hit Rate:	0.0460251	0.511506	0.517259	0.0460251	0	0	0	0.517259	0	0	0	0.0460251	0.0460251	0.0460251	0.460251	0	0	0	0	0	0	0.0460251	0.0460251	0	0	0.402197	0.0580544	0	0	0	0	0.137552	0.042364	0	0.0460251	0	0	0.0460251	0	0.0883891	0	0	0	0	0	0
Suggested Composition
Sample_ID
#9_2nd_invitro_cluster_99
#9_2nd_invitro_cluster_52
#9_2nd_invitro_cluster_39	NTSB2	DBLa0.15	CIDRa2.5	DBLd1	CIDRb1
#9_2nd_invitro_cluster_73	NTSB	DBLa0.6	CIDRa3.2	DBLd1	CIDRb6
#9_2nd_invitro_cluster_92	NTSB7	DBLa0.12	CIDRa4	DBLd1	CIDRb5
#9_2nd_invitro_cluster_106 = cluster 96 1st	NTSA1	DBLa1.1	CIDRa1.2	DBLb11	DBLg1	DBLe1	DBLg1	DBLz	DBLe1	DBLg1
#9_2nd_invitro_cluster_78	NTSB3	DBLa0.9	CIDRa2.7	DBLg13	DBLd1	CIDRg2	DBLe2	DBLe2	DBLe2
#9_2nd_invitro_cluster_15 =cluster 9 ev	NTSB3	DBLa0.5	CIDRa2.3	DBLd1	CIDRb1	DBLe4
#9_2nd_invitro_cluster_0=cluster 0 1st	NTSB3	DBLa0.11	CIDRa2.4	DBLd1		DBLz6	DBLe9
#9_2nd_invitro_cluster_24	NTSB3	DBLa0.5	CIDRa2.3	DBLd1	CIDRb1	DBLe4
#9_2nd_invitro_cluster_82 = cluster 72 1st	NTSB3	DBLa0.5	CIDRa2.3	DBLd1	CIDRb1	DBLe4
#9_2nd_invitro_cluster_27	NTSB3	DBLa0.1	CIDRa3.2	DBLd1	CIDRg1
#9_2nd_invitro_cluster_110	NTSB3	DBLa0.6	CIDRa3.1
#9_2nd_invitro_cluster_61		DBLa0.16	CIDRa3.4	DBLd1	CIDRb1
[truncated: 177 more columns]

## Sheet: #14_ex vivo
	Total reads	Singletons
	1976	88
						Position D1	Position D1	Position D2	Position D2	Position D2	Position D2	Position D3	Position D3	Position D3	Position D3	Position D3	Position D4	Position D4	Position D4	Position D4	Position D4	Position D4	Position D4	Position D4	Position D5	Position D5	Position D5	Position D5	Position D5	Position D5	Position D5	Position D5	Position D6	Position D6	Position D6	Position D6	Position D6	Position D6	Position D6	Position D6	Domain 07	Domain 07	Domain 07	Domain 07	Domain 07	Domain 07	Domain 07	Domain 07	Domain 08
Sample_ID	Cluster_size	Blast_cluster_sequnece	Best Blast hit	E-value	# hits in varDB	NTSA	NTSB	DBLa0	DBLa1	DBLa2	DBLpam1	CIDRa1	CIDRa2-6	CIDRb	CIDRg	CIDRd	DBLb	DBLg	DBLd	DBLe	DBLz	CIDRb	CIDRg	CIDRd	DBLb	DBLg	DBLd	DBLe	DBLz	CIDRb	CIDRg	CIDRd	DBLb	DBLg	DBLd	DBLe	DBLz	CIDRb	CIDRg	CIDRd	DBLb	DBLg	DBLd	DBLe	DBLz	CIDRb	CIDRg	CIDRd	DBLb
#14_exvivo_cluster_93	321	AGATATCGTTAGAGGAAAAGATCTGTATCTCGGTTATGATGataaagaaaaagatcaaagaaaacaattagaaaagaatttgaaaacaattttcgcgaaaatACATGAGGGATTGAAGGATCCAGAAAAAACTAAATATAATGATCCCaaaaaaaaaTTATTATAAATTACGAGAAGATTGGTGGACGGCGAATCGCTCCACAGTATGGAAAGCTATCACATGTAGTGCTGGAGACAATGATAAATATTCAAAAAGCACCGAACATGGTAAAACGGGTGTTTCAAGTGGTAAATGCGGTAATAGGGATCAAGATGTCCCAACGCATTTAGATTACGTTCCTCAATTTTTACGT	DBLa0.15	5.66575e-139	1	0	0	0	0	0	0	0	0	0	0	0	0	0	0	0	0	0	0	0	0	0	0	0	0	0	0	0	0	0	0	0	0	0	0	0	0	0	0	0	0	0	0	0	0
#14_exvivo_cluster_139	227	CGATATTATTAGGGGAAAAGATCTGTATCTTGGTGATAAAGGAGAAAAACTGAAATTAGAAGAAAGATTACAAAAAATGTTTCAGAACATTAAGAAAAATAATTATTCAACACTTAATAATCTTTCACTAGAACAGGTAAGGGAATATTGGTGGGCACTTAATAGAAGAGACGTATGGAAAGCTATCACCTGCAGCGCTGGGAGTGATTCTCAATATTTTCGACGAACATGTGGTAGTGATGAAAAAACTGCAATTCGGACTCCCAGTCACTGCCGGTGTAAGGACGACCAGGTTCCTACATATTTTGACTATGTGCCGCAGTTTCTTCGC	DBLa0.11	3.35076e-171	2	0	1	2	0	0	0	0	2	0	0	0	0	0	2	0	0	0	0	0	0	0	0	0	0	0	1	0	0	0	0	0	0	0	0	0	0	0	0	0	0	0	0	0	0
#14_exvivo_cluster_86	97	TGATATTGTAAGAGGAAAAGATCTGTATCTCGGTGGTAGAGGAAGAGATCAATTAGAAAGTAATTTGAGAAAAATTTTCGGGAAAATACATGACAAATTGGGAGATGAAGCAAAAAAATTACTACGCAAAAGAAAAAGATCCAGATTTTTTAAAATTACGAGAAGATTGGTGGTATGCGAATCGCGCCACAATCTGGGAAGCCATGACATGCAACGACGACAACAAGCTAGCAAATGCTCAATATTTTCGAGCAACATGTGGTAGTGGAAATAATGCAAGACGGGATCCTAGTCAATGCCGATGTAGCGACAACCAGGTTCCCACATATTTTGACTACGTGCCGCAGTATCTTCGT	DBLa0.1	0	9	0	8	8	0	0	0	0	8	0	0	0	0	0	7	0	0	0	0	0	0	0	0	0	0	4	3	0	0	1	0	0	0	0	0	0	0	0	0	0	1	0	0	0	0
#14_exvivo_cluster_140	92	AGACATTATACGAGGAAAAGATCTTTTCCTTGGTCATAAACaaaaaaaaaaaTGAATTAGAAGCAAGATTACAAAAAATGTTTAAGAACATTAAGGAAAAGAATCCAGCACTTATACGCCTTAAAAATGAAGAAGTTAGGGAATATTGGTGGGCACTTAATAGAAAGGACGTATGGAAAGCCATGACATGTGATGCGCCACCTGATGCTCAATATTTTCGAGGAACATGTGGTAGTAATGCAAAAACTGCACCTCAGACTCCTAGTCAATGCCGGTGTAACGGCGACCAAGTCCCCACATATTTCGATTATGTGCCGCAGTATCTTCGC	DBLa0.15	0	2	0	0	1	0	0	0	0	1	0	0	0	0	0	1	0	0	0	0	0	0	0	0	0	0	1	0	0	0	0	0	0	0	0	0	0	0	0	0	0	0	0	0	0	0
#14_exvivo_cluster_29	86	TGATATCGTTAGAGGAAAAGATCTATTTTATGGTAATCCACAAGAAAAAGATCAAAGAGATAAATTAGACAAGAATTTGAAAGAAATTTTCGCGAAAATCCATGGGAAACTGACAAAAGAAGCACAAGAATATTACAAAAAAGATGATAAAGACGGAAATTATTATCAATTAAGAGAAGATTGGTGGAACGCTAATAGACAAGAAGTATGGAAAGCTATCACGTGCAACGCTCAGGGTTTTAACTATTTTCGACACACATGTAATGGAGGAGAACAAACTAAAGGTTACTGCCGGTGTGAGAAGAAAAGTGGCGGAAAGGGCGGCGAAGTAAATATTGTCCCCACATATTTCGACTATGTGCCACAGTTTCTTCGC	DBLa0.13	6.69857e-129	5	0	3	3	0	0	0	0	3	0	0	0	2	1	0	0	0	0	0	0	0	1	1	0	0	0	0	0	0	0	0	0	0	1	0	0	0	0	0	0	0	0	0	0	0
#14_exvivo_cluster_142	84	TGATATTATTAGGGGAAAAGATCTGTATCTTGGTGATAAAGGAGAAAAACTGAAATTAGAAGAAAGATTACAAAAAATGTTTCAGAACATTAAGAAAAATAATTATTCAACACTTAATAATCTTTCACTAGAACAGGTAAGGGAATATTGGTGGGCACTTAATAGAAGAGACGTATGGAAAGCTATCACCTGCAGCGCTGGGAGTGATTCTCAATATTTTCGAGGAACATGTGGTAGTGGACGAGATGCAATTCGGACTCCCAGTCACTGCCGGTGTAAGGACGACCAGGTTCCTACATATTTCGATTATGTGCCACAGTATCTTCGC	DBLa0.11	5.48072e-179	4	0	2	3	0	0	0	0	3	0	0	0	0	0	3	0	0	0	0	0	0	0	0	0	0	1	1	0	0	0	0	0	0	0	0	0	0	0	0	0	0	0	0	0	0
#14_exvivo_cluster_25	67	GCGATATTGTGAGAGGAAGAGATCTATTTTATGGTAATCCACAAGAAAAAGAACAAAGAGAAAAATTAGACGAGAAGTTGAAAACAATTTTCGGGAAAATACATAAGGAAGTGACGAAGAACGGCGCACAAGAACGCTACAATGGTGATAAAGAAAATTATTATAAATTAAGAGAAGATTGGTGGACTGCTAATCGCGCCAAAGTATGGGAAGCAATTACATGTAAGGCGGAGCAAAATGATAAATATTTTAGAGATGCATGTTCTAATGACACATCAGACACTAACGAAAAATGCCGCTGTAGCGACAAGTCAAAGGCTGGCAACGGCGACGTAAATATTGTCCCCACCTATTTTGACTACGTGCCGCAGTATCTTCGT	DBLa0.15	0	2	0	0	1	0	0	0	0	1	0	0	0	0	0	1	0	0	0	0	0	0	0	0	0	0	1	0	0	0	0	0	0	0	0	0	0	0	0	0	0	0	0	0	0	0
#14_exvivo_cluster_40	62	AGATATTGTCAGAGGAAGAGATCTATTTTATGGTAATCCACaagaaaaagaaaaaagagaagacttagaaaaTAATTTGAAAACAATTTTCAAGCAAATACATGAAGGATTGAAGAATGGGAGGACGAATGGGAAGAATGTGGATACGCTAAAAGATCGCTACCAAGGTGATGATAATTATTATCAATTACGAGAAGATTGGTGGGCACTTAATAGAAAAGATGTTTGGAAAGCATTAACATGTGAAGCATACGGTACATATTTTCGACACACATGTAATGGACAAAATCCAACTCAGACTGAAGATAACTGCCAATGTATCAATGGTGATGTCCCCACCTATTTTGACTATGTGCCACAGTTTCTTCGC	DBLa0.6	0	6	0	5	5	0	0	0	0	5	0	0	0	4	0	0	0	0	0	0	0	0	3	1	0	0	0	0	0	0	0	2	1	0	0	0	0	0	0	0	1	0	1	1	0	0
#14_exvivo_cluster_131	61	TGATATTATTAGAGGAAAGGATCTATATCTTGGTGATAACAAGAAGGATAAAGCACAAAAACTAAAATTACAAGATAATTTAAAAGAAATTTTCAAGAACATTAAGAATACTAATCCAAGACTTACTGATCTTACAGATGACCAAATTAGGGAATACTGGTGGGCAATTCATAGAAAAGAGGTTTGGGAAGCATTAACATGTTCTGCGGATGGCAGTGAAGATTATTTCATACAATCAGAAAGAAATAAAAAATTATTTTCAAATTCTAAATGCGGCCATAATAAAGACGGTGATCCTCTTACGAATTTAGATTACGTCCCTCAATTTTTACGT	DBLa1.5	0	34	25	0	0	26	0	0	0	0	5	6	15	6	18	1	0	0	0	0	0	0	8	13	0	0	1	0	0	1	5	1	0	0	10	2	0	11	0	1	1	0	1	0	0	0
#14_exvivo_cluster_28	57	GAGATATTGTCAGAGGAAGAGATCTATTTTATGGTAATCCACAAGAAAGTACACAAAGAGAAAAATTAGAGAAGAATTTGAAAGAAATTTTCGCGAAAATACATGGAAATTTGAGGAATGGTGTAAAAGAACGCTACAATGATGATGCCaaaaaaaaTTATTATCAATTACGTGAAGATTGGTGGACTGCAAATCGGCACACCGTGTGGAAAGCAATCACATGTCATGCAGGACAAAATGATAAATATTTTAGAAATACATGTAATGGAGGAAGTCCAACTGAAGGTTACTGCCGGTGTGACGGCGACAAACCAGGTAGCGACAAGCCAAATACCGATCCTCCTACATATTTTGACTATGTGCCACAGTATCTTCGC	DBLa0.5	1.11583e-131	10	0	7	7	0	0	0	0	7	0	0	0	0	0	6	0	0	0	0	0	0	0	0	0	0	4	2	0	0	0	0	0	2	0	0	0	0	0	0	2	0	0	0	0	0
#14_exvivo_cluster_17	51	AGATATTATTCGTGGAAAAGATCTTTTTATAGGTTATAATCAAAAAGATCGAAATGAAAAAGCTAAATTACAAGAGAACTTGACaaaaattttcgggaaaatatatggaaaattgaatgaaaaaataaaatcaaaCTATAATGATGATCCAGATTATTTTCAATTAAGGGAAGATTGGTGGTATGCGAATCGCGCCACAATCTGGGAAGCTATCACATGTAACGCTAAGGGTTATCAATATTTTCGTGCAACGTGCGATAGTGGTGATAATGAAAACACTGCAACTCTTGCTAGAAACCAATGCCGGTGTGGCGACGGCAAGTCAAAGGGCGCAAATGCCGACCAAGTCCCCACATATTTTGACTATGTCCCACAATATTTGAGA	DBLa0.5	1.11583e-131	10	0	7	7	0	0	0	0	7	0	0	0	0	0	6	0	0	0	0	0	0	0	0	0	0	4	2	0	0	0	0	0	2	0	0	0	0	0	0	2	0	0	0	0	0
#14_exvivo_cluster_115	48	AGATATCGTACGCGGCAAAGATCTATATCTTCGATATAATAGAAAAGATAAAACTGATAAGTTACAAGAACAATTAAAAAAATATTTCCAGAAAATATATGACAAATTGAATGATAAGGAGGGAGCAAAAGAACGCTACAATGATACTACAAATTATTATGAATTAAGAGAAGATTGGTGGTATGCTAATAGAAGACAGGTATGGAAAGCTATCACGTGCAGCGCTGCGGGTAATACATATTTTCGAAAAACAGCGTGTGGAGGATATGCAAGTAATGATAAATGCCGATGTATCAGTGGAGATCCTCCTACATATTTTGACTATGTGCCGCAGTTTCTTCGC	DBLa0.9	0	2	0	2	2	0	0	0	0	2	0	0	0	0	0	2	0	0	0	0	0	0	0	0	0	0	2	0	0	0	0	0	0	0	0	0	0	0	0	0	0	0	0	0	0	0
#14_exvivo_cluster_147	42	CGATATTATTAGGGGAAAAGATCTGTATCTTGGTGATAAAGGAGAAAAACTGAAATTAGAAGAAAGATTACAAAAAATGTTTCAGAACATTAAGAAAAATAATTATTCAACACTTAATAATCTTTCACTAGAACAGGTAAGGGAATATTGGTGGGCACTTAATAGAAGAGACGTATGGAAAGCTATCACCTGCAGCGCTGGGAGTGATTCTCAATATTTTCGAGGAACATGTGGTAGTGGACGAGATGCAATTCGGACTCCCAGTCACTGCCGGTGTATCAGTGGAGATCCTCCTACATATTTTGACTATGTGCCGCAGTTTCTTCGC	DBLa0.11	2.56803e-172	2	0	1	2	0	0	0	0	2	0	0	0	0	0	2	0	0	0	0	0	0	0	0	0	0	0	1	0	0	0	0	0	0	0	0	0	0	0	0	0	0	0	0	0	0
#14_exvivo_cluster_161	41	AGATATCGTTAGAGGAAAAGATCTTTTCCTTGGTCATAATCAAAGGaaaaaaaaaaTTAGAAGAAAGATTAGAACAAATGTTTGAGAACATTCAGGTTAAAAATGCAAAACGTGAGGGTCTTTCAATAGATGCGGTAAGAGAATACTGGTGGGCACTTAATAGACAAGAAATATGGAAAGCTATCACATGTAAAGCAAATGATGGTGATAAATATTTTAGAGATGCATGTAATGGAGGAAAATCTTCGACTCAAGGTAAATGCCGGTGTAACGGCGACCAGGTCCCTACATATTTCGATTATGTGCCGCAGTATCTTCGG	DBLa0.15	5.66575e-139	1	0	0	0	0	0	0	0	0	0	0	0	0	0	0	0	0	0	0	0	0	0	0	0	0	0	0	0	0	0	0	0	0	0	0	0	0	0	0	0	0	0	0	0	0
#14_exvivo_cluster_1	39	AGACATTATAAGAGGAAAAGACCTGTATCTTGGTAAtaaaaaacaaaatgaaatacaaagagaaaaagaaaaattagaagagaatttacaaaaaatTTTCGGGAAAATATATGAAGAATTGATAAAGAACGCGAGTAATGGGAAGGAAGCACAAGAACGCTACAAAAAAGATGATAAAGATCCAAATTATTATAAATTACGAGAAGATTGGTGGGAAGCTAATAGAAAAGAAGTATGGAAAGCTATCACGTGCGGTGCTGACCATGGTAATAGATATTTTCGAGCAACGTGCAGTGATAGTCATCGTAGTGAAACTTTTTCTCAAGCTAAGGAAAAATGCCGCTGTAAGGACGAAGAGGGCAAAAATACCGACCAGGTCCCCACATATTTTGACTACGT…	DBLa0.11	0	6	0	3	3	0	0	0	0	3	0	0	0	0	0	3	0	0	0	0	0	0	0	0	0	0	3	0	0	0	0	0	0	0	0	0	0	0	0	0	0	0	0	0	0	0
#14_exvivo_cluster_77	33	AGATATAATCAGAGGAAAAGATCTGTATCTAGGTGATAACGGAAAGGAAAAATTAGAAGAGAATTTAAAAACAATTTTCGGGAAAATATATGACAAATTGGATGGGAAGAAAGTGCACAAATCGGCAAAAGAGCACTACAAAGAAGATAAAGAAACAGGAAATTATTATCAATTACGTGAAGATTGGTGGAACGCTAATAGAAAAATGGTATGGTATGCTATCACTTGTGGTGCAGGACAAATTGATAAATATTTTAGAAATGCATGTTCTAATAACACAACAGAGACTGATAAAAAATGCCGATGCGCTATTGGAACTGTTCCTACATATTTCGATTATGTGCCGCAGTATCTTCGC	DBLa0.9	0	7	0	3	3	0	0	0	0	3	0	0	0	0	0	2	0	0	0	0	0	0	0	0	0	0	2	0	0	0	0	0	0	0	0	0	0	0	0	0	0	0	0	0	0	0
#14_exvivo_cluster_73	31	AGATATTATTCGTGGAAAAGATCTGTATCTCGGTTATGATGATAAAGAAAAAGAACAAAGAGAAAAATTAGAAAATAATTTGAAAGGAGTTTTCGCGAAAATACATAGTGGATTGACGAAGAAAGGCGCAGAAGCGCGCTACGGAAGTGATAAAGATCCAAAttttttttAAATTACGAGAAGATTGGTGGGATCTTAATAGACATGATGTATGGAAAGCAATTACATGTGATGCACCAGATAATGCTAAATATAAAGTAATAAAACCAGATGGCAGTACAAAAGATTCGACATGGATAAAATGTAGAAACATTGTAGGTGTTCCCACTAATTTTGATTATGTTCCACAATATTTGAGA	DBLa2	0	3	0	1	0	0	1	0	1	0	0	0	0	1	0	0	0	0	0	0	0	0	1	0	0	0	0	0	0	0	0	0	0	1	0	0	0	0	0	0	1	0	0	0	0	0
#14_exvivo_cluster_30	28	AGATATTGTCAGAGGAAGAGATTTGTATCTCGGTAATCCACAAGAAAACAAACAAAGAGATGAATTAGATGATAAGTTGAAAGATATTTTCGGGAAAATTAAGGGAAATAATAATTCAACACTTAAGGATCTTCCACTACATAAGGTAAGGGAATATTGGTGGTATGCGAATCGCGCCACAGTATGGAAAGCAATTACATGTGACGACAGGCTAGAGGGTAATGCATATTTTCGAGCAACATGTAGTGATAGAGATCGTAATGGAACTTTGTCTCGTGCTAATCACTACTGCCGGTGTAACGGCGACAAGCCAGATAAAGACAAGGCAAATGTCGATCCCCCAACCTATTTTGATTATGTGCCACAATATTTAAGA	DBLa0.11	0	1	0	1	1	0	0	0	0	1	0	0	0	0	0	1	0	0	0	0	0	0	0	0	0	0	1	0	0	0	0	0	0	0	0	0	0	0	0	0	0	0	0	0	0	0
#14_exvivo_cluster_46	26	AGATATCGTACGCGGTAAAGATTTATTTTATGGTAATCCACAAGAAAAAGAACAAAGAGAAAAATTAGACGAGAAGTTGAAAACAATTTTCGGGAATATATATGAAAAATTGTCGAGGACGAATGGGAAGGTACCAGAAAATTACTACGGACAAGACAGTCCAAATTATTATAAATTACGAGAAGATTGGTGGACAGCGAATCGAGAAACGGTGTGGGAAGCATTAACATGTGACGCGCGAGATAATGCTGATGATAAATATTTTAGAAAAACAGCGTGTGCAGGAAGAAGTCCGACTGATGGTCGATGCCGATGTAGCGACGACCAGGTCCCTACATATTTTGATTATGTGCCGCAGTATCTTCGC	DBLa0.16	0	23	0	12	17	0	0	0	0	17	0	0	0	0	0	14	0	0	0	0	0	0	0	0	0	0	13	0	0	0	0	0	0	0	0	0	0	0	0	0	0	0	0	0	0	0
#14_exvivo_cluster_127	21	TGACATTATACGAGGAAAAGATCTTTTCCTTGGTCATCAACAAAGAAAAAAACATTTAGAAAAACGTTTAGAACAAATGTTTAAGAACATTCAGAAAAATAATAATACTAAACTAGGTCAACTTACACTAGATCAGGTAAGAGAATATTGGTGGGCACTTAATAGAGACCAAGTATGGAAAGCCATCACGTGCGAAGCTGGGGGTGATAAATATTTTCGAAAAACATGTGGTGATGATAGTGGAACGTTGTCTCATGCTAGTAACAAATGCCGATGTGCCGGTAAAAATGCCGACAAAGTCCCCACATATTTTGACTACGTGCCGCAGTATCTTCGC	DBLa0.6	2.31346e-83	2	0	0	0	0	0	0	0	0	0	0	0	0	0	0	0	0	0	0	0	0	0	0	0	0	0	0	0	0	0	0	0	0	0	0	0	0	0	0	0	0	0	0	0	0
#14_exvivo_cluster_122	20	TGATATTGTAAGAGGAATAGATATGTTTAAACCAAATGTCCATGACAAAGTAGAAAAGGGTCTCCGAGAGGTTTTCAAGAAAATACATGATGGAATGGAAGATGAAGTAAAAAATGATTACAATCCTGATGGATCTGGAAATTATTATAAATTAAGAGAAGCATGGTGGAATGTGAATAGAAATAAAGTATGGGAAGCCATAACCTGTGGGGCACTACCTAAATCTGCATATGTCTTGCAATCAGAAAATAATACACAATTACCTTCATATCTTAAATGCGGCCATAATAATAAGGATGATCCTCCTACCAATTTAGATTATGTTCCTCAATATTTACGT	DBLa1.1	0	200	155	0	0	158	0	0	156	2	0	0	0	153	0	0	0	1	0	0	0	0	142	0	0	0	0	0	0	0	1	0	129	0	0	0	0	0	116	1	0	0	0	0	0	0
#14_exvivo_cluster_75	18	AGACATTATACGAGGAAAAGATCTGTATCTCGGTTATGATGATAAAGAAAAAGAACAAAGAGAAAAATTAGAAAATAATTTGAAAGGAGTTTTCGCGAAAATACATAGTGGATTGACGAAGAAAGGCGCAGAAGCGCGCTACGGAAGTGATAAAGATCCAAATTTTTTTAAATTACGAGAAGATTGGTGGGATCTTAATAGACATGATGTATGGAAAGCAATTACATGTGATGCACCAGATAATGCTAAATATAAAGTAATAAAACCAGATGGAACTATAACACCATCTAACTATAAAAAATGTAGAAACATTGTAGGTGTTCCCACTAATTTTGATTATGTTCCACAATATTTGAGA	DBLa2	0	2	0	1	0	0	1	0	1	0	0	0	0	1	0	0	0	0	0	0	0	0	1	0	0	0	0	0	0	0	0	0	0	1	0	0	0	0	0	0	1	0	0	0	0	0
#14_exvivo_cluster_95	18	AGATATCGTTAGAGGAAGAGATTTGTATCGTGGTGATAATAGGgaaaaaacaaaattagaaaagaatttgaaaaaaattttcaagaaaatacatgaaaatTTGGGTACACAGGATGCAAAAGACCACTACCAAGATGAAGAAGACGGAAATTATTATCAATTAAGAGAAGATTGGTGGAATAATAATAGAAAAAAAGTCTGGGATGCTATCACATGCAATGCTGGGGGTGGTAAATATTTTAGAAATACATGTGGTGATAAAAAGAACCCAAGTCCGACTCAAGGTAAATGCCGATGTGCCGGTAATATCGATCCCCCAACCTATTTCGATTATGTGCCGCAGTATCTTCGC	DBLa0.11	0	2	0	0	1	0	0	0	0	1	0	0	0	0	0	1	0	0	0	0	0	0	0	0	0	0	1	0	0	0	0	0	0	0	0	0	0	0	0	0	0	0	0	0	0	0
#14_exvivo_cluster_45	17	TGATATTGTGAGAGGAAGAGATTTGTATCTCGGTGATAATAgaaaagatagagaacaaagaaaaaaattagatgagaatttgaaaaaaaTTTTCAAGCAAATACATGAAGAATTGATAAAGAAAAAGACGGAAGCACAAGAACGCTACAAAAAAGATGAAGATGACGGTGGAAATTATTATCAATTACGAGAAGATTGGTGGGAAGAAAATAGAGAAACAGTATGGAAAGCTATCACGTGCAACGCTCAGGGTTTTAACTATTTTCGACAAACATGTTCAAAAGGGCATGGGGGGACTCAAAATAACTGCCGATGTATCAATTTTAGTGTTCCTACATATTTTGACTACGTCCCTCAGTATCTTCGC	DBLa0.8	0	3	0	2	2	0	0	0	0	2	0	0	0	0	0	2	0	0	0	0	0	0	0	0	0	0	2	0	0	0	0	0	0	0	0	0	0	0	0	0	0	0	0	0	0	0
#14_exvivo_cluster_76	17	TGATATTATAAGAGGAAAAGATCTTTTCCTTGGTCATCAACAAAGAAAAAGAAAATTAGAAGAGAATTTACAAAAAATTTTTGGGCATATATATAAAGAATTAACGAAGAATGGGAAGACGAATGTGGATGCGCTACAAGCTCGCTACGGAAGTGACGGTCCAGAATTTTTTAAATTACGAGAAGATTGGTGGTATGCTAATAGACAAGAAGTATGGAAAGCTATCACATGTGGTGTAGAAGAAAACGAGAAATATTTTAAAGACACATGTTCATCCAAAAATGTGCATTATAGAAAATGTCATTGTAATGATGGAGATGTTCTTACAAATTTCGATTACGTCCCTCAATATTTAAGA	DBLa0.12	0	4	0	0	4	0	0	0	0	4	0	0	0	0	0	3	0	0	0	0	0	0	0	0	0	0	1	2	0	0	0	0	0	1	0	0	0	0	0	0	1	0	0	0	0	0
#14_exvivo_cluster_165	16	AGACATTGTCAGAGGAAGAGATCTGTATCTTCGAGATAAAGGAGGAAAAACAAAATTAGAAAAGAATTTGGAAAAAATTTTTGAGTACATTAAGAACAAGAATAAATCAACACTTGAATCACTTACAGATAAAGAAATTAGGGAATATTGGTGGGAAGAAAATAGAGAAACAGTATGGAAAGCTATCACGTGCAGCGCTGGGGGTAATAAATATTTTCGACCAACATGTAGTGAAGACACTTGGAGTCGGGATAAGTGCCACTGCATCAATGACGGTGTTCCCACTAATTTCGATTATGTGCCTCAATATTTGAGA	DBLa0.23	5.29063e-179	27	0	21	21	0	0	0	0	21	0	0	0	0	1	20	0	0	0	0	0	0	0	0	0	1	16	3	0	0	0	0	1	0	0	0	0	0	0	0	0	0	0	0	0	0
#14_exvivo_cluster_24	15	GGACATTGTCAGAGGAAAAGATCTATTTCGTGGTTATAATGaaaaagatcaagaagaaaaaacaaaattacaagaaaatttgaaaaaaaattttcgagaaaaTACATGAAGGATTGTCGACGACGAGAGGGAAGAAAGGGCACAAGTCGGCAAAAGACCACTACAAAGATGATACTGCAAATTATTATCAATTACGAGAAGATTGGTGGTATGCGAATCGCGGCACAGTATGGAAAGCACTAACATGTGGTGCACCAATACATGGTGTACAGTATTTTCGAAAAACATGTTCAAATGGAGGTAGTTATGCTTATAAACAATGCAGATGTATTACGCATGATGTTCCTACATATTTTGACTATGTGCCGCAGTATCTTCGC	DBLa1.2	0	19	14	0	0	14	0	0	15	0	0	0	0	13	2	0	0	0	0	0	0	0	9	1	1	0	0	0	0	0	0	10	0	0	1	0	0	1	0	0	0	0	7	3	0	2
#14_exvivo_cluster_114	15	TGATATTGTAAGAGGAAGGGATATGTTTAAACGTAATAACCATGACAATGTAGAAAACGGTCTAAGAGAAGTTTTTAGGAAAATATATAATGGCTTGAAGGACAAGGGAATTCATCATTATAAAGATGATGATATTTCTGGAAATTACTCCAAATTAAGGGAAGCTTGGTGGATAGCTAACAGAGATCAAGTCTGGAAAGCTATAACATGTGAAGCTCCACAAAAAGTTGATTATTTTAGAAAAGGTTCAAATGGAGAAAGTATTTTTTCAAATAGTGGAAAATGTGGTGGTAAGGAAGCACCCGTTCCTACCAATTTAGATTACGTTCCTCAATTTTTACGT	DBLa1.2	0	29	15	0	0	18	0	0	18	0	0	0	0	18	0	0	0	0	0	0	0	1	15	0	0	0	0	0	0	1	10	2	0	0	0	0	0	0	0	9	0	0	2	0	0	0
#14_exvivo_cluster_121	14	AGATATTGTAAGAGGAAAAGATATGTTTAAACCTAATCCGCAGGATAAAGTACAAGAAGGTCTAAAAAATGTTTTCAAGAATATACATGAAAATTTAACTGAACCTTTAAAAAGTCATTACGCAGATGATGATGGATCTGGAAATTACTATAAATTAAGAGAAGACTGGTGGAAAGCGAACAGAGATCAAGTATGGAAAGCCATAACATGCAAAGCACCAACAGGTGCTGATTATTTCGTATATAAACCAAATAGAGTTCGTACCTTTACAAATACTAAATGCGGTCATGATGATAAAGATGTTCCTACCAATTTAGATTATGTCCCTCAATTTTTACGT	DBLa1.6	0	70	54	0	0	56	0	0	45	0	0	11	0	46	8	0	0	0	0	0	0	0	42	0	5	0	0	0	0	0	5	36	0	6	0	0	0	0	0	4	6	0	28	3	1	27
#14_exvivo_cluster_54	14	GACATTATACGAGGAAAAGATCTGTATCTCGGTTATGATGAtaaagaaaaaaagcaaaatggaaaaaaaacagaaagagaaaaaTTAGAACAGAAATTGAAAGATATTTTCAAGAAAATATATGAAAAATTGGATTCAAAAGCACAAACTCCCTACAATGGTGACGGTGATAATTTTTTTCAATTACGAGAAGATTGGTGGGCACATAATAGACAAGACGTATGGAAAGCATTAACATGTGATGCTGGGAATGCTCAATATTTTCGACACACATGTAATGGACAAGATAAAACCCACAACAAATGCCGATGTGAAGGCGCAAATGTTGTCCCCACATATTTTGATTATGTGCCGCAGTATCTTCGC	DBLa0.11	0	1	0	1	1	0	0	0	0	1	0	0	0	0	0	1	0	0	0	0	0	0	0	0	0	0	1	0	0	0	0	0	0	0	0	0	0	0	0	0	0	0	0	0	0	0
#14_exvivo_cluster_123	14	AGATATTGTAAGAGGACGTGATATGTTTAAACCAAATGATGCTGACAAAGTACAAAAAGGTCTAAGGGCAGTTTTCCAGAAAATACATGATAAATTAAAGCAACCTGAAAAAGATTATTACAATGCTGATGAAAAAGGAAATTTTTATAAATTAAGGGAAGATTGGTGGACAGCGAACAGGGATCAAGTATGGAAAGCACTAACCTGTTATGCACCAGACAAAGCTAATTATTTCATATATAAATCAGATAATTTACTTAACTTTTCTAGTGATAGGTGTGGTCATAATAATAACGATGGTCCTCTTACCAATTTAGATTACGTCCCTCAATTTTTACGT	DBLa1.2	0	19	14	0	0	14	0	0	15	0	0	0	0	13	2	0	0	0	0	0	0	0	9	1	1	0	0	0	0	0	0	10	0	0	1	0	0	1	0	0	0	0	7	3	0	2
#14_exvivo_cluster_13	13	AGATATTGTAAGAGGAAAAGATCTTTATCGTCGTGATAATAaaaaagataaaaaagataaattacaagaacaattaaaaaaaaTATTTCCAACAAATACATGGTGGATTGTCGGAGGAAGCAAAAGAACACTACGGAAGTGATAAAGAAAATTATTATCAATTAAGGGAAGATTGGTGGACAGCGAATCGCGCCACAATCTGGGAAGCCATCACATGTGAAGCAAAAACTGATGATAAATATTTTAGAAAAACATGTTCTAATGATACATCACACACTAAGGAAAAATGCCGCTGTGACGACAAGCCAAGTGGCGGAAAGACCGGCAAGGGAAGTGGCGACGTAAGTATTGTCCCCACCTATTTCGATTATGTGCCGCAGTATCTTCGC	DBLa0.15	0	2	0	0	1	0	0	0	0	1	0	0	0	0	0	1	0	0	0	0	0	0	0	0	0	0	1	0	0	0	0	0	0	0	0	0	0	0	0	0	0	0	0	0	0	0
#14_exvivo_cluster_116	12	TGATATTGTAAGAGGAAGAGATTTGTATGGTGGTAATAAGAAAAAAGATAAATTAGAAAAGAATTTGAAAACAATTTTCAAAGAAATATATGACAATTTGAACGATGCAGATGTGAAAAAACACTACGAAGATGATGATAAAGGAACTGAAAATTATTATAAATTAAGGAATGCTTGGTGGGAAGCTAATAGAAAAGAAGTATGGAAAGCTATCATATGCGGCGCTGCGGGTGGTACATATTTTAGAAAAACATGTGGTTCAGGAGAATGGACTAATGAAAAATGCCGATGTCCGATAAATGATGTCCCCACCTATTTTGACTACGTGCCGCAGTTTCTTCGC	DBLa0.8	0	19	0	14	15	0	0	0	0	15	0	0	0	0	1	15	0	0	0	0	0	0	0	1	0	0	8	5	0	1	0	0	0	1	1	0	0	0	1	0	1	0	0	0	0	0
#14_exvivo_cluster_57	12	AGACATTATAAGAGGAAAAGATCTGTATCTCGGTGGTAGAGGAAGAGATCAATTAGAAAGTAAGTTGAAAGAAATTTTCGGGAAAATACATAGTGAAGTGACGAAGGGAGGGAAGAATGTAAAAAAGCAGTCTCTACAAGAACGCTACGGAAATGATCCAAATTTTTTTAAATTACGAGAAGATTGGTGGAACGCTAATAGACAAGAAGTATGGTACGCGATAACATGCGGCGCTGCGGGGGGTAATATATATTTTCGAGCAACATGTGGTAGTGGAAATAATGCAACTCAGGCTAAAGACAAATGCCGATGTACCACAAATTATGTTCCCACATATTTCGATTATGTGCCGCAGTATCTTCGC	DBLa0.9	6.05097e-179	1	0	0	0	0	0	0	0	0	0	0	0	0	0	0	0	0	0	0	0	0	0	0	0	0	0	0	0	0	0	0	0	0	0	0	0	0	0	0	0	0	0	0	0	0
#14_exvivo_cluster_155	11	AGATATCGTACGCGGCAAAGATCTATTCCTTGGTCATCAACaaagaaaaaaagaattagaaaaaagattacaaaaaaTGTTTCAGAACATTCAGAGTACTATTGATCAACTTAATGGTCTTTCACTAGATGAAGTAAGAGAATATTGGTGGAACGCTAATAGACAACAAGTATGGAAAGCTATCACATGTGATGCTAAAGAGGAGGATACATATTCAAAAATCACCGATAATGGTAGAAGAACTCATTCATATGATAAATGCGGTCATGATGTGGATAAAGATGTTCCAACGAACTTGGACTACGTCCCTCAATATTTACGG	DBLa0.3	0	3	0	3	3	0	0	0	0	3	0	0	0	0	0	2	0	0	0	0	0	0	0	0	0	0	1	1	0	0	0	0	0	0	0	0	0	0	0	0	0	0	0	0	0	0
					# hits in varDB	NTSA	NTSB	DBLa0	DBLa1	DBLa2	DBLpam1	CIDRa1	CIDRa2-6	CIDRb	CIDRg	CIDRd	DBLb	DBLg	DBLd	DBLe	DBLz	CIDRb	CIDRg	CIDRd	DBLb	DBLg	DBLd	DBLe	DBLz	CIDRb	CIDRg	CIDRd	DBLb	DBLg	DBLd	DBLe	DBLz	CIDRb	CIDRg	CIDRd	DBLb	DBLg	DBLd	DBLe	DBLz	CIDRb	CIDRg	CIDRd	DBLb
				Sample_total:	533	277	98	113	286	2	0	251	115	5	17	15	257	33	96	0	1	0	0	0	1	231	18	7	1	68	21	0	3	22	61	131	14	14	2	0	13	117	15	16	1	46	10	1	31
Interpreded Results				Position D1	Position D1	Position D2	Position D2	Position D2	Position D2	Position D3	Position D3	Position D3	Position D3	Position D3	Position D3	Position D4	Position D4	Position D4	Position D4	Position D4	Position D4	Position D4	Position D4	Position D5	Position D5	Position D5	Position D5	Position D5	Position D5	Position D5	Position D5	Position D6	Position D6	Position D6	Position D6	Position D6	Position D6	Position D6	Position D6	Domain 07	Domain 07	Domain 07	Domain 07	Domain 07	Domain 07	Domain 07	Domain 07	Domain 08	Domain 08
Sample_ID	Cluster_size			NTSA	NTSB	DBLa0	DBLa1	DBLa2	DBLpam1	CIDRa1	CIDRa2-6	CIDRb	CIDRg	CIDRd	CIDRa1.2-3	DBLb	DBLg	DBLd	DBLe	DBLz	CIDRb	CIDRg	CIDRd	DBLb	DBLg	DBLd	DBLe	DBLz	CIDRb	CIDRg	CIDRd	DBLb	DBLg	DBLd	DBLe	DBLz	CIDRb	CIDRg	CIDRd	DBLb	DBLg	DBLd	DBLe	DBLz	CIDRb	CIDRg	CIDRd	DBLb	DBLg
#14_exvivo_cluster_93	321
#14_exvivo_cluster_139	227			0	1	1	0	0	0	0	1	0	0	0		0	0	1	0	0	0	0	0	0	0	0	0	0	0	1	0	0	0	0	0	0	0	0	0	0	0	0	0	0	0	0	0	0	0
#14_exvivo_cluster_86	97			0	1	1	0	0	0	0	1	0	0	0		0	0	1	0	0	0	0	0	0	0	0	0	0	0	0	0	0	0	0	0	0	0	0	0	0	0	0	0	0	0	0	0	0	0
#14_exvivo_cluster_140	92			0	0	1	0	0	0	0	1	0	0	0		0	0	1	0	0	0	0	0	0	0	0	0	0	1	0	0	0	0	0	0	0	0	0	0
#14_exvivo_cluster_29	86			0	1	1	0	0	0	0	1	0	0	0		0	0	0	0	0	0	0	0	0	0	0	0	0	0	0	0	0	0	0	0	0	0	0	0	0	0	0	0	0	0	0	0	0	0
#14_exvivo_cluster_142	84			0	1	1	0	0	0	0	1	0	0	0		0	0	1	0	0	0	0	0	0	0	0	0	0	0	0	0	0	0	0	0	0	0	0	0	0	0	0	0	0	0	0	0	0	0
#14_exvivo_cluster_25	67			0	0	1	0	0	0	0	1	0	0	0		0	0	1	0	0	0	0	0	0	0	0	0	0	1	0	0	0	0	0	0	0	0	0	0
#14_exvivo_cluster_40	62			0	1	1	0	0	0	0	1	0	0	0		1	0	0	0	0	0	0	0	0	1	0	0	0	0	0	0	0	0	0	0	0	0	0	0	0	0	0	0	0	0	0	0	0	0
#14_exvivo_cluster_131	61			1	0	0	1	0	0	0		0	0	0		0	1	0	0	0	0	0	0	0	0	0	0	0	0	0	0	0	0	0	0	0	0	0	0	0	0	0	0	0	0	0	0	0	0
#14_exvivo_cluster_28	57			0	1	1	0	0	0	0	1	0	0	0		0	0	1	0	0	0	0	0	0	0	0	0	0	0	0	0	0	0	0	0	0	0	0	0	0	0	0	0	0	0	0	0	0	0
#14_exvivo_cluster_17	51			0	1	1	0	0	0	0	1	0	0	0		0	0	1	0	0	0	0	0	0	0	0	0	0	0	0	0	0	0	0	0	0	0	0	0	0	0	0	0	0	0	0	0	0	0
#14_exvivo_cluster_115	48			0	1	1	0	0	0	0	1	0	0	0		0	0	1	0	0	0	0	0	0	0	0	0	0	1	0	0	0	0	0	0	0	0	0	0	0	0	0	0	0	0	0	0	0	0
#14_exvivo_cluster_147	42			0	1	1	0	0	0	0	1	0	0	0		0	0	1	0	0	0	0	0	0	0	0	0	0	0	1	0	0	0	0	0	0	0	0	0	0	0	0	0	0	0	0	0	0	0
#14_exvivo_cluster_161	41
#14_exvivo_cluster_1	39			0	1	1	0	0	0	0	1	0	0	0		0	0	1	0	0	0	0	0	0	0	0	0	0	1	0	0	0	0	0	0	0	0	0	0	0	0	0	0	0	0	0	0	0	0
#14_exvivo_cluster_77	33			0	1	1	0	0	0	0	1	0	0	0		0	0	1	0	0	0	0	0	0	0	0	0	0	1	0	0	0	0	0	0	0	0	0	0	0	0	0	0	0	0	0	0	0	0
#14_exvivo_cluster_73	31			0	1	0	0	1	0	1		0	0	0		1	0	0	0	0	0	0	0	0	1	0	0	0	0	0	0	0	0	0	0	1	0	0	0	0	0	0	1	0	0	0	0	0	0
#14_exvivo_cluster_30	28			0	1	1	0	0	0	0	1	0	0	0		0	0	1	0	0	0	0	0	0	0	0	0	0	1	0	0	0	0	0	0	0	0	0	0	0	0	0	0	0	0	0	0	0	0
#14_exvivo_cluster_46	26			0	1	1	0	0	0	0	1	0	0	0		0	0	1	0	0	0	0	0	0	0	0	0	0	1	0	0	0	0	0	0	0	0	0	0	0	0	0	0	0	0	0	0	0	0
#14_exvivo_cluster_127	21
#14_exvivo_cluster_122	20			1	0	0	1	0	0	0		0	0	0	1	1	0	0	0	0	0	0	0	0	1	0	0	0	0	0	0	0	0	0	1	0	0	0	0	0	1	0	0	0	0	0	0	0	0
#14_exvivo_cluster_75	18			0	1	0	0	1	0	1		0	0	0		1	0	0	0	0	0	0	0	0	1	0	0	0	0	0	0	0	0	0	0	1	0	0	0	0	0	0	1	0	0	0	0	0	0
#14_exvivo_cluster_95	18			0	0	1	0	0	0	0	1	0	0	0		0	0	1	0	0	0	0	0	0	0	0	0	0	1	0	0	0	0	0	0	0	0	0	0
#14_exvivo_cluster_45	17			0	1	1	0	0	0	0	1	0	0	0		0	0	1	0	0	0	0	0	0	0	0	0	0	1	0	0	0	0	0	0	0	0	0	0	0	0	0	0	0	0	0	0	0	0
#14_exvivo_cluster_76	17			0	0	1	0	0	0	0	1	0	0	0		0	0	1	0	0	0	0	0	0	0	0	0	0	0	0	0	0	0	0	0	0	0	0	0	0	0	0	0	0	0	0	0
#14_exvivo_cluster_165	16			0	1	1	0	0	0	0	1	0	0	0		0	0	1	0	0	0	0	0	0	0	0	0	0	1	0	0	0	0	0	1	0	0	0	0	0	0	0	0	0	0	0	0	0	0
#14_exvivo_cluster_24	15			1	0	0	1	0	0	1		0	0	0		1	0	0	0	0	0	0	0	0	1	0	0	0	0	0	0	0	0	1	0	0	0	0	0	0	0	0	0	0	0	0	0	0	0
#14_exvivo_cluster_114	15			1	0	0	1	0	0	1		0	0	0		1	0	0	0	0	0	0	0	0	1	0	0	0	0	0	0	0	1	0	0	0	0	0	0	0	0	1	0	0	0	0	0	0	0
#14_exvivo_cluster_121	14			1	0	0	1	0	0	1		0	0	0		1	0	0	0	0	0	0	0	0	1	0	0	0	0	0	0	0	0	1	0	0	0	0	0	0	0	0	0	0	0	0	0	0	0
#14_exvivo_cluster_54	14			0	1	1	0	0	0	0	1	0	0	0		0	0	1	0	0	0	0	0	0	0	0	0	0	1	0	0	0	0	0	0	0	0	0	0	0	0	0	0	0	0	0	0	0	0
#14_exvivo_cluster_123	14			1	0	0	1	0	0	1		0	0	0		1	0	0	0	0	0	0	0	0	1	0	0	0	0	0	0	0	0	1	0	0	0	0	0	0	0	0	0	0	0	0	0	0	0
#14_exvivo_cluster_13	13			0	0	1	0	0	0	0	1	0	0	0		0	0	1	0	0	0	0	0	0	0	0	0	0	1	0	0	0	0	0	0	0	0	0	0
#14_exvivo_cluster_116	12			0	1	1	0	0	0	0	1	0	0	0		0	0	1	0	0	0	0	0	0	0	0	0	0	0	0	0	0	0	0	0	0	0	0	0	0	0	0	0	0	0	0	0	0	0
#14_exvivo_cluster_57	12
#14_exvivo_cluster_155	11			0	1	1	0	0	0	0	1	0	0	0		0	0	1	0	0	0	0	0	0	0	0	0	0	0	0	0	0	0	0	0	0	0	0	0	0	0	0	0	0	0	0	0	0	0
			Hit Rate:	0.0798851	0.574138	0.664943	0.0798851	0.0281609	0	0.0614943	0.664943	0	0	0	0.0114943	0.108621	0.0350575	0.579885	0	0	0	0	0	0	0.108621	0	0	0	0.236207	0.154598	0	0	0.00862069	0.0247126	0.0206897	0.0281609	0	0	0	0	0.0114943	0.00862069	0.0281609	0	0	0	0	0	0
Suggested Composition
Sample_ID
#14_exvivo_cluster_93
#14_exvivo_cluster_139	NTSB3	DBLa0.11	CIDRa2.4	DBLd	CIDRg7
#14_exvivo_cluster_86	NTSB3	DBLa0.1	CIDRa3.1	DBLd1
#14_exvivo_cluster_140		DBLa0.15	CIDRa3.2	DBLd1	CIDRb1
#14_exvivo_cluster_29	NTSB3	DBLa0	CIDRa2.5
#14_exvivo_cluster_142	NTSB3	DBLa0.11	CIDRa2.4	DBLd
#14_exvivo_cluster_25		DBLa0.15	CIDRa3.2	DBLd1	CIDRb1
#14_exvivo_cluster_40	NTSB	DBLa0.6	CIDRa3.1	DBLb5	DBLg
#14_exvivo_cluster_131	NTSA	DBLa1.5		DBLg12
#14_exvivo_cluster_28	NTSB3	DBLa0.13	CIDRa2.3	DBLd1
#14_exvivo_cluster_17	NTSB3	DBLa0.13	CIDRa2.3	DBLd1
#14_exvivo_cluster_115	NTSB3	DBLa0.9	CIDRa4	DBLd1	CIDRb1
#14_exvivo_cluster_147	NTSB3	DBLa0.11	CIDRa2.4	DBLd	CIDRg7
#14_exvivo_cluster_161
#14_exvivo_cluster_1	NTSB3	DBLa0.11	CIDRa2.4	DBLd1	CIDRb
#14_exvivo_cluster_77	NTSB3	DBLa0.9	CIDRa2.4	DBLd1	CIDRb
#14_exvivo_cluster_73	NTSB1	DBLa2	CIDRa1.1	DBLb12	DBLg14	DBLz5	DBLe4
#14_exvivo_cluster_30	NTSB3	DBLa0.11	CIDRa2.4	DBLd1	CIDRb5
#14_exvivo_cluster_46	NTSB3	DBLa0.16	CIDRa3.4	DBLd1	CIDRb1
#14_exvivo_cluster_127
#14_exvivo_cluster_122	NTSA1	DBLa1.1	CIDRa1.2	DBLb11	DBLg1	DBLe1	DBLg1	DBLz	DBLe1
#14_exvivo_cluster_75	NTSB1	DBLa2	CIDRa1.1	DBLb12	DBLg14	DBLz5	DBLe4
#14_exvivo_cluster_95		DBLa0.11	CIDRa2.4	DBLd1	CIDRb6
#14_exvivo_cluster_45	NTSB7	DBLa0.8	CIDRa3.4	DBLd1	CIDRb
#14_exvivo_cluster_76		DBLa0.12	CIDRa2.4	DBLd1
#14_exvivo_cluster_165	NTSB3	DBLa0.23	CIDRa3.3	DBLd1	CIDRb1	DBLe14
#14_exvivo_cluster_24	NTSA3	DBLa1.2	CIDRa1.5	DBLb	DBLg	DBLd
#14_exvivo_cluster_114	NTSA7	DBLa1.2	CIDRa1.5	DBLb3	DBLg	DBLg	DBLd	CIDRb1	DBLb3
#14_exvivo_cluster_121	NTSA2	DBLa1.1	CIDRa1.7	DBLb1	DBLg12	DBLd5
#14_exvivo_cluster_54	NTSB3	DBLa0.11	CIDRa2.4	DBLd1	CIDRb5
#14_exvivo_cluster_123	NTSA3	DBLa1.2	CIDRa1.5	DBLb	DBLg	DBLd
#14_exvivo_cluster_13		DBLa0.15	CIDRa3.2	DBLd1	CIDRb1
#14_exvivo_cluster_116	NTSB3	DBLa0.8	CIDRa3.2	DBLd1
#14_exvivo_cluster_57
#14_exvivo_cluster_155	NTSB	DBLa0.3	CIDRa3.2	DBLd1
[truncated: 177 more columns]

## Sheet: #14_2nd in vitro
	Total reads	Singletons
	2655	148
						Position D1	Position D1	Position D2	Position D2	Position D2	Position D2	Position D3	Position D3	Position D3	Position D3	Position D3	Position D4	Position D4	Position D4	Position D4	Position D4	Position D4	Position D4	Position D4	Position D5	Position D5	Position D5	Position D5	Position D5	Position D5	Position D5	Position D5	Position D6	Position D6	Position D6	Position D6	Position D6	Position D6	Position D6	Position D6	Domain 07	Domain 07	Domain 07	Domain 07	Domain 07	Domain 07	Domain 07	Domain 07	Domain 08
Sample_ID	Cluster_size	Blast_cluster_sequnece	Best Blast hit	E-value	# hits in varDB	NTSA	NTSB	DBLa0	DBLa1	DBLa2	DBLpam1	CIDRa1	CIDRa2-6	CIDRb	CIDRg	CIDRd	DBLb	DBLg	DBLd	DBLe	DBLz	CIDRb	CIDRg	CIDRd	DBLb	DBLg	DBLd	DBLe	DBLz	CIDRb	CIDRg	CIDRd	DBLb	DBLg	DBLd	DBLe	DBLz	CIDRb	CIDRg	CIDRd	DBLb	DBLg	DBLd	DBLe	DBLz	CIDRb	CIDRg	CIDRd	DBLb
#14_2nd_invitro_cluster_180	558	CGATATTATTAGGGGAAAAGATCTGTATCTTGGTGATAAAGGAGAAAAACTGAAATTAGAAGAAAGATTACAAAAAATGTTTCAGAACATTAAGAAAAATAATTATTCAACACTTAATAATCTTTCACTAGAACAGGTAAGGGAATATTGGTGGGCACTTAATAGAAGAGACGTATGGAAAGCTATCACCTGCAGCGCTGGGAGTGATTCTCAATATTTTCGAGGAACATGTGGTAGTGGACGAGATGCAATTCGGACTCCCAGTCACTGCCGGTGTAAGGACGACCAGGTTCCTACATATTTTGACTATGTGCCGCAGTTTCTTCGCT	DBLa0.11	7.11025e-178	4	0	2	3	0	0	0	0	3	0	0	0	0	0	3	0	0	0	0	0	0	0	0	0	0	1	1	0	0	0	0	0	0	0	0	0	0	0	0	0	0	0	0	0	0
#14_2nd_invitro_cluster_117	242	AGATATCGTTAGAGGAAAAGATCTGTATCTCGGTTATGATGataaagaaaaagatcaaagaaaacaattagaaaagaatttgaaaacaattttcgcgaaaatACATGAGGGATTGAAGGATCCAGAAAAAACTAAATATAATGATCCCaaaaaaaaaTTATTATAAATTACGAGAAGATTGGTGGACGGTGAATCGCTCCACAGTATGGAAAGCTATCACATGTAGTGCTGGAGACAATGATAAATATTCAAAAAGCACCGAACATGGTAAAACGGGTGTTTCAAGTGGTAAATGCGGTAATAGGGATCAAGATGTCCCAACGCATTTAGATTACGTTCCTCAATTTTTACGT	DBLa0.1	0	9	0	8	8	0	0	0	0	8	0	0	0	0	0	7	0	0	0	0	0	0	0	0	0	0	4	3	0	0	1	0	0	0	0	0	0	0	0	0	0	1	0	0	0	0
#14_2nd_invitro_cluster_110	196	GTGATATTGTAAGAGGAAAAGATCTGTATCTCGGTGGTAGAGGAAGAGATCAATTAGAAAGTAATTTGAGAAAAATTTTCGGGAAAATACATGACAAATTGGGAGATGAAGCAAAAAATTACTACGCAAAAGAAAAAGATCCAGATTTTTTAAAATTACGAGAAGATTGGTGGTATGCGAATCGCGCCACAATCTGGGAAGCCATGACATGCAACGACGACAACAAGCTAGCAAATGCTCAATATTTTCGAGCAACATGTGGTAGTGGAAATAATGCAAGACGGGATCCTAGTCAATGCCGATGTAGCGACAACCAGGTTCCCACATATTTTGACTATGTGCCGCAGTATCTTCGC	DBLa0.1	0	9	0	8	8	0	0	0	0	8	0	0	0	0	0	7	0	0	0	0	0	0	0	0	0	0	4	3	0	0	1	0	0	0	0	0	0	0	0	0	0	1	0	0	0	0
#14_2nd_invitro_cluster_179	165	GGAGACATTATACGAGGAAAAGATCTTTTCCTTGGTCATAAACaaaaaaaaaaTGAATTAGAAGCAAGATTACAAAAAATGTTTAAGAACATTAAGGAAAAGAATCCAGCACTTATACGCCTTAAAAATGAAGAAGTTAGGGAATATTGGTGGGCACTTAATAGAAAGGACGTATGGAAAGCCATGACATGTGACGCGCCACCTGATGCTCAATATTTTCGAGGAACATGTGGTAGTAATGCAAAAACTGCACCTCAGACTCCTAGTCAATGCCGGTGTAACGGCGACCAAGTCCCCACATATTTCGATTATGTGCCGCAGTATCTTCGC	DBLa1.2	0	29	15	0	0	18	0	0	18	0	0	0	0	18	0	0	0	0	0	0	0	1	15	0	0	0	0	0	0	1	10	2	0	0	0	0	0	0	0	9	0	0	2	0	0	0
#14_2nd_invitro_cluster_212=cluster 161 ev	105	AGATATCGTTAGAGGAAAAGATCTTTTCCTTGGTCATAATCAAAGGaaaaaaaaaaTTAGAAGAAAGATTAGAACAAATGTTTGAGAACATTCAGGTTAAAAATGCAAAACGTGAGGGTCTTTCAATAGATGCGGTAAGAGAATACTGGTGGGCACTTAATAGACAAGAAATATGGAAAGCTATCACATGTAAAGCAAATGATGGTGATAAATATTTTAGAGATGCATGTAATGGAGGAAAATCTTCGACTCAAGGTAAATGCCGGTGTAACGGCGACCAGGTCCCTACATATTTCGATTATGTGCCGCAGTATCTTCGG	DBLa0.15	7.38115e-133	2	0	0	0	0	0	0	0	0	0	0	0	0	0	0	0	0	0	0	0	0	0	0	0	0	0	0	0	0	0	0	0	0	0	0	0	0	0	0	0	0	0	0	0	0
#14_2nd_invitro_cluster_95	96	AGACATTATACGAGGAAAAGATCTGTATCTCGGTTATGATGATAAAGAAAAAGAACAAAGAGAAAAATTAGAAAATAATTTGAAAGGAGTTTTCGCGAAAATACATAGTGGATTGACGAAGAAAGGCGCAGAAGCGCGCTACGGAAGTGATAAAGATCCAAATTTTTTTAAATTACGAGAAGATTGGTGGGATCTTAATAGACATGATGTATGGAAAGCAATTACATGTGATGCACCAGATAATGCTAAATATAAAGTAATAAAACCAGATGGCAGTACAAAAGATTCGACATGGATAAAATGTAGAAACATTGTAGGTGTTCCCACTAATTTTGATTATGTTCCACAATATTTGAGA	DBLa2	0	3	0	1	0	0	1	0	1	0	0	0	0	1	0	0	0	0	0	0	0	0	1	0	0	0	0	0	0	0	0	0	0	1	0	0	0	0	0	0	1	0	0	0	0	0
#14_2nd_invitro_cluster_44	95	GTGATATCGTTAGAGGAAAAGATCTATTTTATGGTAATCCACAAGAAAAAGATCAAAGAGATAAATTAGACAAGAATTTGAAAGAAATTTTCGCGAAAATCCATGGGAAACTGACAAAAGAAGCACAAGAATATTACAAAAAAGATGATAAAGACGGAAATTATTATCAATTAAGAGAAGATTGGTGGAACGCTAATAGACAAGAAGTATGGAAAGCTATCACGTGCAACGCTCAGGGTTTTAACTATTTTCGACACACATGTAATGGAGGAGAACAAACTAAAGGTTACTGCCGGTGTGAGAAGAAAAGTGGCGGAAAGGGCGGCGAAGTAAATATTGTCCCCACATATTTCGACTATGTACCACAGTTTCTTCGC	DBLa0.19	1.45366e-125	3	0	2	2	0	0	0	0	2	0	0	0	2	0	0	0	0	0	0	0	0	1	0	0	0	0	0	0	0	0	0	0	0	0	0	0	0	0	0	0	0	0	0	0	0
#14_2nd_invitro_cluster_219	85	AGACATTGTCAGAGGAAGAGATCTGTATCTTCGAGATAAAGGAggaaaaacaaaattagaaaagaatttggaaaaaaaTTTTTGAGTACATTAAGAACAAGAATAAATCAACACTTGAATCACTTACAGATAAAGAAATTAGGGAATATTGGTGGGAAGAAAATAGAGAAACAGTATGGAAAGCTATCACGTGCAGCGCTGGGGGTAATAAATATTTTCGACCAACATGTAGTGAAGACACTTGGAGTCGGGATAAGTGCCACTGCATCAATGACGGTGTTCCCACTAATTTCGATTATGTGCCTCAATATTTGAGA	DBLa0.23	5.30647e-179	27	0	21	21	0	0	0	0	21	0	0	0	0	1	20	0	0	0	0	0	0	0	0	0	1	16	3	0	0	0	0	1	0	0	0	0	0	0	0	0	0	0	0	0	0
#14_2nd_invitro_cluster_42 = cluster 25 ev	81	GCGATATTGTGAGAGGAAGAGATCTATTTTATGGTAATCCACAAGAAAAAGAACAAAGAGAAAAATTAGACGAGAAGTTGAAAACAATTTTCGGGAAAATACATAAGGAAGTGACGAAGAACGGCGCACAAGAACGCTACAATGGTGATAAAGAAAATTATTATAAATTAAGAGAAGATTGGTGGACTGCTAATCGCGCCAAAGTATGGGAAGCAATTACATGTAAGGCGGAGCAAAATGATAAATATTTTAGAGATGCATGTTCTAATGACACATCAGACACTAACGAAAAATGCCGCTGTAGCGACAAGTCAAAGGCTGGCAACGGCGACGTAAATATTGTCCCCACCTATTTTGACTACGTGCCGCAGTATCTTCGT	DBLa0.11	7.11025e-178	4	0	2	3	0	0	0	0	3	0	0	0	0	0	3	0	0	0	0	0	0	0	0	0	0	1	1	0	0	0	0	0	0	0	0	0	0	0	0	0	0	0	0	0	0
#14_2nd_invitro_cluster_55	65	AGATATTATACGAGGAAGAGATCTATTTTATGGTAATCCACaagaaaaagaaaaaaagagaagacttagaaaaTAATTTGAAAACAATTTTCAAGCAAATACATGAAGGATTGAAGAATGGGAGGACGAATGGGAAGAATGTGGATACGCTAAAAGATCGCTACCAAGGTGATGATAATTATTATCAATTACGAGAAGATTGGTGGGCACTTAATAGAAAAGATGTTTGGAAAGCATTAACATGTGAAGCATACGGTACATATTTTCGACACACATGTAATGGACAAAATCCAACTCAGACTGAAGATAACTGCCAATGTATCAATGGTGATGTCCCCACCTATTTTGACTATGTGCCACAGTTTCTTCGC	DBLa0.6	0	10	0	8	8	0	0	0	0	8	0	0	0	3	0	4	0	0	0	0	0	0	3	0	0	0	3	1	0	0	0	2	1	0	0	0	0	0	0	0	1	0	1	1	0	0
#14_2nd_invitro_cluster_45=cluster 30 ev	60	AGATATTGTCAGAGGAAGAGATTTGTATCTCGGTAATCCACAAGAAAACAAACAAAGAGATGAATTAGATGATAAGTTGAAAGATATTTTCGGGAAAATTAAGGGAAATAATAATTCAACACTTAAGGATCTTCCACTACATAAGGTAAGGGAATATTGGTGGTATGCGAATCGCGCCACAGTATGGAAAGCAATTACATGTGACGACAGGCTAGAGGGTAATGCATATTTTCGAGCAACATGTAGTGATAGAGATCGTAATGGAACTTTGTCTCGTGCTAATCACTACTGCCGGTGTAACGGCGACAAGCCAGATAAAGACAAGGCAAATGTCGATCCCCCAACCTATTTTGATTATGTGCCACAATATTTAAGA	DBLa0.11	1.92951e-104	2	0	0	2	0	0	0	0	2	0	0	0	0	0	1	0	0	0	0	0	0	0	0	0	0	1	0	0	0	0	0	0	0	0	0	0	0	0	0	0	0	0	0	0	0
#14_2nd_invitro_cluster_28	53	TGATATTATTCGTGGAAAAGATCTTTTTATAGGTTATAATCAAAAAGATCGAAATGAAAAAGCTAAATTACAAGAGAACTTGACaaaaattttcgggaaaatatatggaaaattgaatgaaaaaataaaatcaaaCTATAATGATGATCCAGATTATTTTCAATTAAGGGAAGATTGGTGGTATGCGAATCGCGCCACAATCTGGGAAGCTATCACATGTAACGCTAAGGGTTATCAATATTTTCGTGCAACGTGCGATAGTGGTGATAATGAAAACACTGCAACTCTTGCTAGAATCCAATGCCGGTGTGGCGACGGCAAGTCAAAGGGCGCAAATGCCGACCAAGTCCCCACATATTTTGACTATGTCCCACAATATTTGAGA	DBLa0.16	0	3	0	2	3	0	0	0	0	3	0	0	0	0	0	3	0	0	0	0	0	0	0	0	0	0	1	2	0	0	0	0	0	0	0	0	0	0	0	0	0	0	0	0	0	0
#14_2nd_invitro_cluster_137	52	AGATATCGTACGCGGCAAAGATCTATATCTTCGATATAATAGAAAAGATAAAACTGATAAGTTACAAGAACAATTAAAAAAATATTTCCAGAAAATATATGACAAATTGAATGATAAGGAGGGAGCAAAAAGAACGCTACAATGATACTACAAATTATTATGAATTAAGAGAAGATTGGTGGTATGCTAATAGAAGACAGGTATGGAAAGCTATCACGTGCAGCGCTGCGGGTAATACATATTTTCGAAAAACAGCGTGTGGAGGATATGCAAGTAATGATAAATGCCGATGTATCAGTGGAGATCCTCCTACATATTTTGACTATGTGCCGCAGTTTCTTCGC	DBLa0.9	0	2	0	2	2	0	0	0	0	2	0	0	0	0	0	2	0	0	0	0	0	0	0	0	0	0	2	0	0	0	0	0	0	0	0	0	0	0	0	0	0	0	0	0	0	0
#14_2nd_invitro_cluster_161=cluster 127 ev	47	TGACATTATACGAGGAAAAGATCTTTTCCTTGGTCATCAACAAAGAAAAAAACATTTAGAAAAACGTTTAGAACAAATGTTTAAGAACATTCAGAAAAATAATAATACTAAACTAGGTCAACTTACACTAGATCAGGTAAGAGAATATTGGTGGGCACTTAATAGAGACCAAGTATGGAAAGCCATCACGTGCGAAGCTGGGGGTGATAAATATTTTCGAAAAACATGTGGTGATGATAGTGGAACGTTGTCTCATGCTAGTAACAAATGCCGATGTGCCGGTAAAAATGCCGACAAAGTCCCCACATATTTTGACTACGTGCCGCAGTATCTTCGC	DBLa0.6	1.38253e-85	2	0	0	0	0	0	0	0	0	0	0	0	0	0	0	0	0	0	0	0	0	0	0	0	0	0	0	0	0	0	0	0	0	0	0	0	0	0	0	0	0	0	0	0	0
#14_2nd_invitro_cluster_220	43	AGACATTGTACGAGGAAAAGATCTGTATCTCGGTGATAAAGGAGGAAAAACAAAATTAGAAAAGAATTTGGAAAAAATTTTTGAGTACATTAAGAACAAGAATAAATCAACACTTGAATCACTTACAGATAAAGAAATTAGGGAATATTGGTGGGCACTTAATAGACAAGATGTATGGAAAGCTATCACGTGCAGCGCTGGGGGTAATAAATATTTTCGACCAACATGTAGTGAAGACACTTGGAGTCGGGATAAGTGCCACTGCATCAATGACGGTGTTCCAACTAATTTCGATTATGTGCCTCAATATTTGAGA	DBLa0.9	0	11	0	7	7	0	0	0	0	7	0	0	0	0	0	5	0	0	0	0	0	0	0	0	0	0	2	3	0	0	2	0	0	0	0	0	0	0	0	0	0	2	0	0	0	0
#14_2nd_invitro_cluster_46	39	AGATATTGTCAGAGGAAGAGATCTATTTTATGGTAATCCACAAGAAAGTACACAAAGAGAAAAATTAGAGAAGAATTTGAAAGAAATTTTCGCGAAAATACATGGAAATTTGAGGAATGGTGTAAAAGAACGCTACAATGATGATGCCaaaaaaaaTTATTATCAATTACGTGAAGATTGGTGGACTGCAAATCGGCACACCGTGTGGAAAGCAATCACATGTCATGCAGGACAAAATGATAAATATTTTAGAAATACATGTAATGGAGGAAGTCCAACTGAAGGTTACTGCCGGTGTGACGGCGACAAACCAGGTAGCGACAAGCCAAATACCGATCCTCCTACATATTTTGACTATGTGCCACAGTATCTTCGC	DBLa0.5	8.5434e-138	10	0	7	7	0	0	0	0	7	0	0	0	0	0	6	0	0	0	0	0	0	0	0	0	0	4	2	0	0	0	0	0	2	0	0	0	0	0	0	2	0	0	0	0	0
#14_2nd_invitro_cluster_97	34	TGATATTATAAGAGGAAAAGATCTTTTCCTTGGTCATCAACAAAGAAAAAGAAAATTAGAAGAGAATTTACAAAAAATTTTTGGGCATATATATAAAGAATTAACGAAGAATGGGAAGACGAATGTGGATGCGCTACAAGCTCGCTACGGAAGTGACGGTCCAGAATTTTTTAAATTACGAGAAGATTGGTGGTATGCTAATAGACAAGAAGTATGGAAAGCTATCACATGTGGTGTAGAAGAAAACGAGAAATATTTTAAAGACACATGTTCATCCAAAAATGTGCATTATAGAAAATGTCATTGTAATGATGGAGATGTTCTTACAAATTTCGATTATGTCCCTCAATATTTACGT	DBLa0.12	0	3	0	0	3	0	0	0	0	3	0	0	0	0	0	2	0	0	0	0	0	0	0	0	0	0	0	2	0	0	0	0	0	1	0	0	0	0	0	0	1	0	0	0	0	0
#14_2nd_invitro_cluster_166	34	TGATATTATTAGAGGAAAGGATCTATATCTTGGCGATAACAAGAAGGATAAAGCACAAAAACTAAAATTACAAGATAATTTAAAAGAAATTTTCAAGAACATTAAGAATACTAATCCAAGACTTACTGATCTTACAGATGACCAAATTAGGGAATACTGGTGGGCAATTCATAGAAAAGAGGTTTGGGAAGCATTAACATGTTCTGCGGATGGCAGTGAAGATTATTTCATACAATCAGAAAGAAATAAAAAATTATTTTCAAATTCTAAATGCGGCCATAATAAAGACGGTGATCCTCTTACGAATTTAGATTACGTCCCTCAATTTTTACGT	DBLa1.5	0	32	24	0	0	25	0	0	0	0	5	6	14	6	17	1	0	0	0	0	0	0	8	13	0	0	1	0	0	1	5	1	0	0	10	2	0	11	0	1	1	0	1	0	0	0
#14_2nd_invitro_cluster_150=cluster 122 ev	27	TGATATTGTAAGAGGAATAGATATGTTTAAACCAAATGTCCATGACAAAGTAGAAAAGGGTCTCCGAGAGGTTTTCAAGAAAATACATGATGGAATGGAAGATGAAGTAAAAAATGATTACAATCCTGATGGATCTGGAAATTATTATAAATTAAGAGAAGCATGGTGGAATGTGAATAGAAATAAAGTATGGGAAGCCATAACCTGTGGGGCACTACCTAAATCTGCATATGTCTTGCAATCAGAAAATAATACACAATTACCTTCATATCTTAAATGCGGCCATAATAATAAGGATGATCCTCCTACCAATTTAGATTATGTTCCTCAATATTTACGT	DBLa1.1	0	200	155	0	0	158	0	0	156	2	0	0	0	153	0	0	0	1	0	0	0	0	142	0	0	0	0	0	0	0	1	0	129	0	0	0	0	0	116	1	0	0	0	0	0	0
#14_2nd_invitro_cluster_62=cluster 46 ev	22	AGATATCGTACGCGGTAAAGATTTATTTTATGGTAATCCACAAGAAAAAGAACAAAGAGAAAAATTAGACGAGAAGTTGAAAACAATTTTCGGGAATATATATGAAAAATTGTCGAGGACGAATGGGAAGGTACCAGAAAATTACTACGGACAAGACAGTCCAAATTATTATAAATTACGAGAAGATTGGTGGACAGCGAATCGAGAAACGGTGTGGGAAGCATTAACATGTGACGCGCGAGATAATGCTGATGATAAATATTTTAGAAAAACAGCGTGTGCAGGAAGAAGTCCGACTGATGGTCGATGCCGATGTAGCGACGACCAGGTCCCTACATATTTTGATTATGTGCCGCAGTATCTTCGC	DBLa0.16	0	23	0	12	17	0	0	0	0	17	0	0	0	0	0	14	0	0	0	0	0	0	0	0	0	0	13	0	0	0	0	0	0	0	0	0	0	0	0	0	0	0	0	0	0	0
#14_2nd_invitro_cluster_74	20	CGATATTGTGAGAGGAAGAGATCTATTTTATGGAAATACACAAGAAAAAACAAAAAGAGAACAATTAGATGATAAGTTGAAAGAGGTTTTTGGGAAAATACATAGTGGATTGACAGGTAGTGCAAAAGACCACTACCAAGATAAAAATGGTGGAAATTATTATAAATTACGAGAAGATTGGTGGTCACTTAATAGAGAAACAGTATGGAAAGCCATGACATGTAGCGACGAGCTAAGAGGTGCTTCATATTTTCGACCAACGTGCATTGATGGAGAGAGTCAGTCTCAAGCTCATGACAAATGTCGATGTCCCAAAGGCGACCAGGTCCCCACCTATTTTGACTATGTGCCGCAGTTTCTTCGC	DBLa0.16	0	3	0	2	3	0	0	0	0	3	0	0	0	0	0	3	0	0	0	0	0	0	0	0	0	0	1	2	0	0	0	0	0	0	0	0	0	0	0	0	0	0	0	0	0	0
#14_2nd_invitro_cluster_207	17	GAGATATCGTACGCGGCAAAGATCTTTTCCTTGGTCATCAACaaagaaaaaaagaattagaaaaaagattacaaaaaaTGTTTCAGAACATTCAGAGTACTATTGATCAACTTAATGGTCTTTCACTAGATGAAGTAAGAGAATATTGGTGGAACGCTAATAGACAACAAGTATGGAAAGCTATCACATGTGATGCTAAAGAGGAGGATACATATTCAAAAATCACCGATAATGGTAGAAGAACTCATTCATATGATAAATGCGGTCATGATGTGGATAAAGATGTTCCAACGAACTTGGACTACGTCCCTCAATATTTACGG	DBLa0.3	0	3	0	3	3	0	0	0	0	3	0	0	0	0	0	2	0	0	0	0	0	0	0	0	0	0	1	1	0	0	0	0	0	0	0	0	0	0	0	0	0	0	0	0	0	0
#14_2nd_invitro_cluster_141	17	TGATATTGTAAGAGGAAGGGATATGTTTAAACGTAATAACCATGACAATGTAGAAAACGGTCTAAGAGAAGTTTTTAGGAAAATATATAATGGCTTGAAGGACAAGGGAATTCATCATTATAAAGATGATGATATTTCTGGAAATTACTCCAAATTAAGGGAAGCTTGGTGGATAGCTAACAGAGATCAAGTCTGGAAAGCTATAACATGTGAAGCTCCACAAAAAGTTGATTATTTTAGAAAAGGTTCAAATGGAGAAAGTATTTTTTCAAATAGTGGAAAATGTGGTGGTAAGGAAGCACCCGTTCCTACCAATTTAGATTACGTCCCTCAATTTTTACGT	DBLa1.2	0	29	15	0	0	18	0	0	18	0	0	0	0	18	0	0	0	0	0	0	0	1	15	0	0	0	0	0	0	1	10	2	0	0	0	0	0	0	0	9	0	0	2	0	0	0
#14_2nd_invitro_cluster_2=cluster 1 ev	17	AGACATTATAAGAGGAAAAGACCTGTATCTTGGTAAtaaaaaacaaaatgaaatacaaagagaaaaagaaaaattagaagagaatttacaaaaaatTTTCGGGAAAATATATGAAGAATTGATAAAGAACGCGAGTAATGGGAAGGAAGCACAAGAACGCTACAAAAAAGATGATAAAGATCCAAATTATTATAAATTACGAGAAGATTGGTGGGAAGCTAATAGAAAAGAAGTATGGAAAGCTATCACGTGCGGTGCTGACCATGGTAATAGATATTTTCGAGCAACGTGCAGTGATAGTCATCGTAGTGAAACTTTTTCTCAAGCTAAGGAAAAATGCCGCTGTAAGGACGAAGAGGGCAAAAATACCGACCAGGTCCCCACATATTTTGACTACGT…	DBLa0.11	0	6	0	3	3	0	0	0	0	3	0	0	0	0	0	3	0	0	0	0	0	0	0	0	0	0	3	0	0	0	0	0	0	0	0	0	0	0	0	0	0	0	0	0	0	0
#14_2nd_invitro_cluster_96	16	AGATATTATACGAGGAAAAGATCTGTATGAGGGTTATGATGaaaaagaaaaaaaaCGAAGACAACAATTAGAAAATAAGTTGAAAGATATTTTCAAGGAAATACATGAAGGATTGAAGGGTGCAAAAACTCGCTACAATGGTGACGGTGATAATTATTTTCAATTACGAGAAGATTGGTGGAATAATAATAGAAAAATGGTATGGTATGCTATGACGTGCGGTGCAGGAACTAGTGATAAATATTTTCGACGAACATGTGGTAGTGATGAAAAAACTGCAATTCGGACTCCTAGTCAATGCCGATGTAGCACTCGTGTTGTTCCCACATATTTCGATTATGTGCCGCAGTATCTTCGT	DBLa0.16	0	23	0	12	17	0	0	0	0	17	0	0	0	0	0	14	0	0	0	0	0	0	0	0	0	0	13	0	0	0	0	0	0	0	0	0	0	0	0	0	0	0	0	0	0	0
#14_2nd_invitro_cluster_139	16	TGATATTGTAAGAGGAAGAGATTTGTATGGTGGTAATAAGAAAAAAGATAAATTAGAAAAGAATTTGAAAACAATTTTCAAAGAAATATATGACAATTTGAACGATGCAGATGTGAAAAAACACTACGAAGATGATGATAAAGGAACTGAAAATTATTATAAATTAAGGAATGCTTGGTGGGAAGCTAATAGAAAAGAAGTATGGAAAGCTATCATATGCGGCGCTGCGGGTGGTACATATTTTAGAAAAACATGTGGTTCAGGAGAATGGACTAATGAAAAATGCCGATGTCCGATAAATGATGTCCCCACCTATTTTGACTATGTGCCGCAGTATCTTCGT	DBLa0.8	0	19	0	14	15	0	0	0	0	15	0	0	0	0	1	15	0	0	0	0	0	0	0	1	0	0	8	5	0	1	0	0	0	1	1	0	0	0	1	0	1	0	0	0	0	0
#14_2nd_invitro_cluster_138	15	GAGATATTGTCAGAGGCAAAGATCTTTATCTTGGTACCAATGAAGAGAAAAAACCATTAGAAGAAAATTTGAAAAATCTTTTCAAAAGATTATATGAAGAAATAAAGGATGAACAAAAATCTTCTTATGATGATGATGGAACTGGAAATTATTTTAAATTAAGAGAATATTGGTGGAATTCTAATAGAAATGATGTATGGAAAGCTATTACATGTGGTGCAGAAGACGATGATAAATATACGAAAAAGAAACGAAACGGTGAAACAACTCAATCTAGCCATATTAAATGTAGAAACGTTTCAGATCCTCCTACTAATTTGGATTATGTCCCTCAATATTTACGT	DBLa0.4	0	56	0	0	44	0	0	0	0	45	0	0	0	45	0	0	0	0	0	0	0	0	38	2	0	0	0	0	0	0	0	31	0	0	2	0	0	0	0	0	0	0	0	31	0	0
#14_2nd_invitro_cluster_93	14	GAGATATAATCAGAGGAAAAGATCTGTATCTAGGTGATAACGGAAAGGAAAAATTAGAAGAGAATTTAAAAACAATTTTCGGGAAAATATATGACAAATTGGATGGGAAGAAAGTGCACAAATCGGCAAAAGAGCACTACAAAGAAGATAAAGAAACAGGAAATTATTATCAATTACGTGAAGATTGGTGGAACGCTAATAGAAAAATGGTATGGTATGCTATCACTTGTGGTGCAGGACAAATTGATAAATATTTTAGAAATGCATGTTCTAATAACACAACAGAGACTGATAAAAAATGCCGATGCGCTATTGGAACTGTTCCTACATATTTCGATTATGTGCCGCAGTATCTTCGC	DBLa0.9	0	11	0	7	7	0	0	0	0	7	0	0	0	0	0	5	0	0	0	0	0	0	0	0	0	0	2	3	0	0	2	0	0	0	0	0	0	0	0	0	0	2	0	0	0	0
#14_2nd_invitro_cluster_58	14	TGATATTGTAAGAGGAAAAGATCTGTATCTCGGTGGTAGAGGAAGAGATCAATTAGAAAGTAAGTTGAAAGAAATTTTCGGGAAAATACATAGTGAAGTGACGAAGGGAGGGAAGAATGTAAAAAAGCAGTCTCTACAAGAACGCTACGGAAGTGATAAAGATCCAAATTTTTTTAAATTACGAGAAGATTGGTGGAACGCTAATAGACAAGAAGTATGGTACGCGATAACATGCGGCGCTGCGGGGGGTAATATATATTTTCGAGCAACATGTGGTAGTGGAAATAATGCAACTCAGGCTAAAGACAAATGCCGATGTACCACAAATTATGTTCCCACATATTTCGATTATGTGCCGCAGTATCTTCGC	DBLa0.9	6.23358e-169	1	0	0	0	0	0	0	0	0	0	0	0	0	0	0	0	0	0	0	0	0	0	0	0	0	0	0	0	0	0	0	0	0	0	0	0	0	0	0	0	0	0	0	0	0
#14_2nd_invitro_cluster_149	14	AGATATTGTAAGAGGAAAAGATATGTTTAAACCTAATCCGCAGGATAAAGTACAAGAAGGTCTAAAAAATGTTTTCAAGAATATACATGAAAATTTAACTGAACCTTTAAAAAGTCATTACGCAGATGATGATGGATCTGGAAATTACTATAAATTAAGAGAAGACTGGTGGAAAGCGAACAGAGATCAAGTATGGAAAGCCATAACATGCAAAGCACCAACAGGTGCTGATTATTTCGTATATAAACCAAATAGAGTTCGTACCTTTACAAATACTAAATGCGGTCATGATGATAAAGATGTTCCTACCAATTTAGATTACGTCCCTCAATTTTTACGT	DBLa1.1	0	70	54	0	0	56	0	0	45	0	0	11	0	46	8	0	0	0	0	0	0	0	42	0	5	0	0	0	0	0	5	36	0	6	0	0	0	0	0	4	6	0	28	3	1	27
#14_2nd_invitro_cluster_208	12	TGATATTATCAGAGGAAAAGATTTATACCTTGGTCATGAACAGGGAAATAATAAATTAGAGGCTAGATTAAAAACGATATTTCAGAACATTAAGAATAAAAATAAGTCTCCATTATATAAACTTTCAGTGGACAAAGTTAGGGAATATTGGTGGGCGCTTAATAGAGAAGATGTATGGAAAGCATTAACATGTTCTGCGGATGGCAGTGAAGAATATTTCATACAATCAGAAAGTAATAAAAAATTATTTTCAAATTCTAAATGCGGCCATGAACAAGGAAACGTTCCTACCAATTTAGATTACGTCCCTCAATTTTTAAGA	DBLa1.5	0	27	18	0	0	21	0	0	6	0	5	0	10	14	5	0	0	0	0	0	0	4	11	2	0	0	0	0	0	0	12	1	0	0	2	0	0	0	3	0	0	0	1	0	0	0
#14_2nd_invitro_cluster_152=cluster 123 ev	11	AGATATTGTAAGAGGACGTGATATGTTTAAACCAAATGATGCTGACAAAGTACAAAAAGGTCTAAGGGCAGTTTTCCAGAAAATACATGATAAATTAAAGCAACCTGAAAAAGATTATTACAATGCTGATGAAAAAGGAAATTTTTATAAATTAAGGGAAGATTGGTGGACAGCGAACAGGGATCAAGTATGGAAAGCACTAACCTGTTATGCACCAGACAAAGCTAATTATTTCATATATAAATCAGATAATTTACTTAACTTTTCTAGTGATAGGTGTGGTCATAATAATAACGATGGTCCTCTTACCAATTTAGATTACGTCCCTCAATTTTTACGT	DBLa1.2	0	19	14	0	0	14	0	0	15	0	0	0	0	13	2	0	0	0	0	0	0	0	9	1	1	0	0	0	0	0	0	10	0	0	1	0	0	1	0	0	0	0	7	3	0	2
#14_2nd_invitro_cluster_165	11	TGACATTGTAAGAGGAAAGGATATGTTTAAACCAAATAGTGATGACAAAGTAGAAAAAGGACTAAAAGTAGTTTTCGATAAAATATATAAAAAATTAGGAAAAGAAGGAAAACAGTATTATAATGATGAAAATGGAAATTATTATAAATTAAGAGAAGCTTGGTGGAAGGTCAACAGAGATCAAGTATGGAAAGCCATAACATGTAGTGCACCATACCACCCTGGATATTTCAGACAGTCAAAAGATAATAAACAATTATTTTCAGATTATAAATGCGGCCATGAACAAGGAAACGTTCCTACAAATCTTGACTATGTTCCTCAATTTTTACGTT	DBLa1.6	0	1	1	0	0	1	0	0	0	0	0	1	0	0	1	0	0	0	0	0	0	0	0	0	1	0	0	0	0	0	0	0	1	0	0	0	0	0	0	0	1	0	0	0	0	0
					# hits in varDB	NTSA	NTSB	DBLa0	DBLa1	DBLa2	DBLpam1	CIDRa1	CIDRa2-6	CIDRb	CIDRg	CIDRd	DBLb	DBLg	DBLd	DBLe	DBLz	CIDRb	CIDRg	CIDRd	DBLb	DBLg	DBLd	DBLe	DBLz	CIDRb	CIDRg	CIDRd	DBLb	DBLg	DBLd	DBLe	DBLz	CIDRb	CIDRg	CIDRd	DBLb	DBLg	DBLd	DBLe	DBLz	CIDRb	CIDRg	CIDRd	DBLb
				Sample_total:	656	296	123	186	311	1	0	259	189	10	18	24	319	35	120	0	1	0	0	0	6	285	19	7	1	81	32	0	4	49	85	132	11	16	2	0	12	120	24	14	6	42	38	1	29
Interpreded Results				Position D1	Position D1	Position D2	Position D2	Position D2	Position D2	Position D3	Position D3	Position D3	Position D3	Position D3	Position D3	Position D4	Position D4	Position D4	Position D4	Position D4	Position D4	Position D4	Position D4	Position D5	Position D5	Position D5	Position D5	Position D5	Position D5	Position D5	Position D5	Position D6	Position D6	Position D6	Position D6	Position D6	Position D6	Position D6	Position D6	Domain 07	Domain 07	Domain 07	Domain 07	Domain 07	Domain 07	Domain 07	Domain 07	Domain 08	Domain 08
Sample_ID	Cluster_size			NTSA	NTSB	DBLa0	DBLa1	DBLa2	DBLpam1	CIDRa1	CIDRa2-6	CIDRb	CIDRg	CIDRd	CIDRa1.2-3	DBLb	DBLg	DBLd	DBLe	DBLz	CIDRb	CIDRg	CIDRd	DBLb	DBLg	DBLd	DBLe	DBLz	CIDRb	CIDRg	CIDRd	DBLb	DBLg	DBLd	DBLe	DBLz	CIDRb	CIDRg	CIDRd	DBLb	DBLg	DBLd	DBLe	DBLz	CIDRb	CIDRg	CIDRd	DBLb	DBLg
#14_2nd_invitro_cluster_180	558			0	1	1	0	0	0	0	1	0	0	0		0	0	1	0	0	0	0	0	0	0	0	0	0	0	0	0	0	0	0	0	0	0	0	0	0	0	0	0	0	0	0	0	0	0
#14_2nd_invitro_cluster_117	242			0	1	1	0	0	0	0	1	0	0	0		0	0	1	0	0	0	0	0	0	0	0	0	0	0	0	0	0	0	0	0	0	0	0	0	0	0	0	0	0	0	0	0	0	0
#14_2nd_invitro_cluster_110	196			0	1	1	0	0	0	0	1	0	0	0		0	0	1	0	0	0	0	0	0	0	0	0	0	0	0	0	0	0	0	0	0	0	0	0	0	0	0	0	0	0	0	0	0	0
#14_2nd_invitro_cluster_179	165			1	0	0	1	0	0	1		0	0	0		1	0	0	0	0	0	0	0	0	1	0	0	0	0	0	0	0	1	0	0	0	0	0	0	0	0	1	0	0	0	0	0	0	0
#14_2nd_invitro_cluster_212=cluster 161 ev	105
#14_2nd_invitro_cluster_95	96			0	1	0	0	1	0	1		0	0	0		1	0	0	0	0	0	0	0	0	1	0	0	0	0	0	0	0	0	0	0	1	0	0	0	0	0	0	1	0	0	0	0	0	0
#14_2nd_invitro_cluster_44	95			0	1	1	0	0	0	0	1	0	0	0		1	0	0	0	0	0	0	0	0	1	0	0	0	0	0	0	0	0	0	0	0	0	0	0	0	0	0	0	0	0	0	0	0	0
#14_2nd_invitro_cluster_219	85			0	1	1	0	0	0	0	1	0	0	0		0	0	1	0	0	0	0	0	0	0	0	0	0	1	0	0	0	0	0	1	0	0	0	0	0	0	0	0	0	0	0	0	0	0
#14_2nd_invitro_cluster_42 = cluster 25 ev	81			0	1	1	0	0	0	0	1	0	0	0		0	0	1	0	0	0	0	0	0	0	0	0	0	0	0	0	0	0	0	0	0	0	0	0	0	0	0	0	0	0	0	0	0	0
#14_2nd_invitro_cluster_55	65			0	1	1	0	0	0	0	1	0	0	0		0	0	0	0	0	0	0	0	0	0	0	0	0	0	0	0	0	0	0	0	0	0	0	0	0	0	0	0	0	0	0	0	0	0
#14_2nd_invitro_cluster_45=cluster 30 ev	60			0	0	1	0	0	0	0	1	0	0	0		0	0	1	0	0	0	0	0	0	0	0	0	0	1	0	0	0	0	0	0	0	0	0	0
#14_2nd_invitro_cluster_28	53			0	1	1	0	0	0	0	1	0	0	0		0	0	1	0	0	0	0	0	0	0	0	0	0	0	0	0	0	0	0	0	0	0	0	0	0	0	0	0	0	0	0	0	0	0
#14_2nd_invitro_cluster_137	52			0	1	1	0	0	0	0	1	0	0	0		0	0	1	0	0	0	0	0	0	0	0	0	0	1	0	0	0	0	0	0	0	0	0	0	0	0	0	0	0	0	0	0	0	0
#14_2nd_invitro_cluster_161=cluster 127 ev	47
#14_2nd_invitro_cluster_220	43			0	1	1	0	0	0	0	1	0	0	0		0	0	1	0	0	0	0	0	0	0	0	0	0	0	0	0	0	0	0	0	0	0	0	0	0	0	0	0	0	0	0	0	0	0
#14_2nd_invitro_cluster_46	39			0	1	1	0	0	0	0	1	0	0	0		0	0	1	0	0	0	0	0	0	0	0	0	0	0	0	0	0	0	0	0	0	0	0	0	0	0	0	0	0	0	0	0	0	0
#14_2nd_invitro_cluster_97	34			0	0	1	0	0	0	0	1	0	0	0		0	0	1	0	0	0	0	0	0	0	0	0	0	0	1	0	0	0	0	0	1	0	0	0	0	0	0	1	0	0	0	0
#14_2nd_invitro_cluster_166	34			1	0	0	1	0	0	0		0	0	0		0	1	0	0	0	0	0	0	0	0	0	0	0	0	0	0	0	0	0	0	0	0	0	0	0	0	0	0	0	0	0	0	0	0
#14_2nd_invitro_cluster_150=cluster 122 ev	27			1	0	0	1	0	0	0		0	0	0	1	1	0	0	0	0	0	0	0	0	1	0	0	0	0	0	0	0	0	0	1	0	0	0	0	0	1	0	0	0	0	0	0	0	0
#14_2nd_invitro_cluster_62=cluster 46 ev	22			0	1	1	0	0	0	0	1	0	0	0		0	0	1	0	0	0	0	0	0	0	0	0	0	1	0	0	0	0	0	0	0	0	0	0	0	0	0	0	0	0	0	0	0	0
#14_2nd_invitro_cluster_74	20			0	1	1	0	0	0	0	1	0	0	0		0	0	1	0	0	0	0	0	0	0	0	0	0	0	0	0	0	0	0	0	0	0	0	0	0	0	0	0	0	0	0	0	0	0
#14_2nd_invitro_cluster_207	17			0	1	1	0	0	0	0	1	0	0	0		0	0	1	0	0	0	0	0	0	0	0	0	0	0	0	0	0	0	0	0	0	0	0	0	0	0	0	0	0	0	0	0	0	0
#14_2nd_invitro_cluster_141	17			1	0	0	1	0	0	1		0	0	0		1	0	0	0	0	0	0	0	0	1	0	0	0	0	0	0	0	1	0	0	0	0	0	0	0	0	1	0	0	0	0	0	0	0
#14_2nd_invitro_cluster_2=cluster 1 ev	17			0	1	1	0	0	0	0	1	0	0	0		0	0	1	0	0	0	0	0	0	0	0	0	0	1	0	0	0	0	0	0	0	0	0	0	0	0	0	0	0	0	0	0	0	0
#14_2nd_invitro_cluster_96	16			0	1	1	0	0	0	0	1	0	0	0		0	0	1	0	0	0	0	0	0	0	0	0	0	1	0	0	0	0	0	0	0	0	0	0	0	0	0	0	0	0	0	0	0	0
#14_2nd_invitro_cluster_139	16			0	1	1	0	0	0	0	1	0	0	0		0	0	1	0	0	0	0	0	0	0	0	0	0	0	0	0	0	0	0	0	0	0	0	0	0	0	0	0	0	0	0	0	0	0
#14_2nd_invitro_cluster_138	15			0	0	1	0	0	0	0	1	0	0	0		1	0	0	0	0	0	0	0	0	1	0	0	0	0	0	0	0	0	1	0	0	0	0	0	0	0	0	0	0	0	1	0
#14_2nd_invitro_cluster_93	14			0	1	1	0	0	0	0	1	0	0	0		0	0	1	0	0	0	0	0	0	0	0	0	0	0	0	0	0	0	0	0	0	0	0	0	0	0	0	0	0	0	0	0	0	0
#14_2nd_invitro_cluster_58	14
#14_2nd_invitro_cluster_149	14			1	0	0	1	0	0	1		0	0	0		1	0	0	0	0	0	0	0	0	1	0	0	0	0	0	0	0	0	1	0	0	0	0	0	0	0	0	0	0	0	0	0	0	0
#14_2nd_invitro_cluster_208	12			1	0	0	1	0	0	0		0	0	0		1	0	0	0	0	0	0	0	0	0	0	0	0	0	0	0	0	0	0	0	0	0	0	0	0	0	0	0	0	0	0	0	0	0
#14_2nd_invitro_cluster_152=cluster 123 ev	11			1	0	0	1	0	0	1		0	0	0		1	0	0	0	0	0	0	0	0	1	0	0	0	0	0	0	0	0	1	0	0	0	0	0	0	0	0	0	0	0	0	0	0	0
#14_2nd_invitro_cluster_165	11			1	0	0	1	0	0	0		0	1	0		0	1	0	0	0	0	0	0	0	0	0	1	0	0	0	0	0	0	0	1	0	0	0	0	0	0	0	1	0	0	0	0	0	0
			Hit Rate:	0.126908	0.753162	0.758831	0.126908	0.0418666	0	0.132141	0.758831	0	0.00479721	0	0.011775	0.197122	0.0196249	0.682512	0	0	0	0	0	0	0.191888	0	0.00479721	0	0.1099	0.0148277	0	0	0.079372	0.0174444	0.0536415	0.0566943	0	0	0	0	0.011775	0.079372	0.0614915	0	0	0.00654165	0	0	0
Suggested Composition
Sample_ID
#14_2nd_invitro_cluster_180	NTSB3	DBLa0.11	CIDRa2.4	DBLd
#14_2nd_invitro_cluster_117	NTSB3	DBLa0.1	CIDRa3.1	DBLd1
#14_2nd_invitro_cluster_110	NTSB3	DBLa0.1	CIDRa3.1	DBLd1
#14_2nd_invitro_cluster_179	NTSA7	DBLa1.2	CIDRa1.5	DBLb3	DBLg	DBLg	DBLd	CIDRb1	DBLb3
#14_2nd_invitro_cluster_212=cluster 161 ev
#14_2nd_invitro_cluster_95	NTSB1	DBLa2	CIDRa1.1	DBLb12	DBLg14	DBLz5	DBLe4
#14_2nd_invitro_cluster_44	NTSB3	DBLa0	CIDRa2.5	DBLb5	DBLg10
#14_2nd_invitro_cluster_219	NTSB3	DBLa0.23	CIDRa3.3	DBLd1	CIDRb1	DBLe14
#14_2nd_invitro_cluster_42 = cluster 25 ev	NTSB3	DBLa0.11	CIDRa2.4	DBLd
#14_2nd_invitro_cluster_55	NTSB	DBLa0	CIDRa3.1
#14_2nd_invitro_cluster_45=cluster 30 ev		DBLa0.11	CIDRa4	DBLd1	CIDRb1
#14_2nd_invitro_cluster_28	NTSB3	DBLa0	CIDRa3.4	DBLd1
#14_2nd_invitro_cluster_137	NTSB3	DBLa0.9	CIDRa4	DBLd1	CIDRb1
#14_2nd_invitro_cluster_161=cluster 127 ev
#14_2nd_invitro_cluster_220	NTSB3	DBLa0.9	CIDRa2.2	DBLd1
#14_2nd_invitro_cluster_46	NTSB3	DBLa0.13	CIDRa2.3	DBLd1
#14_2nd_invitro_cluster_97		DBLa0.12	CIDRa2.4	DBLd1	CIDRg	DBLz6	DBLe12
#14_2nd_invitro_cluster_166	NTSA	DBLa1.5		DBLg12
#14_2nd_invitro_cluster_150=cluster 122 ev	NTSA1	DBLa1.1	CIDRa1.2	DBLb11	DBLg1	DBLe1	DBLg1	DBLz	DBLe1
#14_2nd_invitro_cluster_62=cluster 46 ev	NTSB3	DBLa0.16	CIDRa3.4	DBLd1	CIDRb1
#14_2nd_invitro_cluster_74	NTSB3	DBLa0	CIDRa3.4	DBLd1
#14_2nd_invitro_cluster_207	NTSB	DBLa0.3	CIDRa3.2	DBLd1
#14_2nd_invitro_cluster_141	NTSA7	DBLa1.2	CIDRa1.5	DBLb3	DBLg	DBLg	DBLd	CIDRb1	DBLb3
#14_2nd_invitro_cluster_2=cluster 1 ev	NTSB3	DBLa0.11	CIDRa2.4	DBLd1	CIDRb
#14_2nd_invitro_cluster_96	NTSB3	DBLa0.16	CIDRa3.4	DBLd1	CIDRb1
#14_2nd_invitro_cluster_139	NTSB3	DBLa0.8	CIDRa3.2	DBLd1
#14_2nd_invitro_cluster_138		DBLa0.4	CIDRa2.1	DBLb5	DBLg2	DBLd4	CIDRg1
#14_2nd_invitro_cluster_93	NTSB3	DBLa0.9	CIDRa2.2	DBLd1
#14_2nd_invitro_cluster_58
#14_2nd_invitro_cluster_149	NTSA2	DBLa1.1	CIDRa1.7	DBLb1	DBLg12	DBLd5
#14_2nd_invitro_cluster_208	NTSA	DBLa1.5		DBLb
#14_2nd_invitro_cluster_152=cluster 123 ev	NTSA3	DBLa1.2	CIDRa1.5	DBLb	DBLg	DBLd
#14_2nd_invitro_cluster_165	NTSA7	DBLa1.6	CIDRg3	DBLg2	DBLe13	DBLe13	DBLe13
[truncated: 177 more columns]

[truncated: 21 more sheets: #25_ex vivo, #25_1st in vitro, #26_ex vivo, #26_1st in vitro, #29_ex vivo, #29_1st in vitro, #29_2nd in vitro, #4_ex vivo, #4_1st in vitro, #4_2nd in vitro, #12_ex vivo, #12_1st in vitro, #12_2nd in vitro, #5_ex vivo, #5_1st in vitro, #7_ex vivo, #7_1st in vitro, #7_2nd in vitro, #17_ex vivo, #17_1st in vitro …]
